# Supplementary material for: Machine learning with sparse nutrition data to improve cardiovascular mortality risk prediction in the USA using nationally randomly sampled data
Source: PubMed Central journal article supplement — BMJ Open. 2019 Nov 28;9(11):e032703. doi: 10.1136/bmjopen-2019-032703 (PMC6924849; doi:10.1136/bmjopen-2019-032703), 2019-11-28

# BMJ Open

BMJ Open is committed to open peer review. As part of this commitment we make the peer review history of every article we publish publicly available.

When an article is published we post the peer reviewers' comments and the authors' responses online. We also post the versions of the paper that were used during peer review. These are the versions that the peer review comments apply to.

The versions of the paper that follow are the versions that were submitted during the peer review process. They are not the versions of record or the final published versions. They should not be cited or distributed as the published version of this manuscript.

BMJ Open is an open access journal and the full, final, typeset and author-corrected version of record of the manuscript is available on our site with no access controls, subscription charges or pay-per-view fees (<http://bmjopen.bmj.com>).

If you have any questions on BMJ Open's open peer review process please email [info.bmjopen@bmj.com](mailto:info.bmjopen@bmj.com)

# BMJ Open

## Using machine learning to incorporate sparse nutrition data into cardiovascular mortality risk prediction

|                               |                                                                                                          |
|-------------------------------|----------------------------------------------------------------------------------------------------------|
| Journal:                      | <i>BMJ Open</i>                                                                                          |
| Manuscript ID                 | bmjopen-2019-032703                                                                                      |
| Article Type:                 | Research                                                                                                 |
| Date Submitted by the Author: | 04-Jul-2019                                                                                              |
| Complete List of Authors:     | Rigdon, Joseph ; Stanford University, Quantitative Sciences Unit<br>Basu, Sanjay; Harvard Medical School |
| Keywords:                     | Cardiovascular disease, machine learning, Nutrition < TROPICAL MEDICINE, risk prediction                 |
|                               |                                                                                                          |

SCHOLARONE™  
Manuscripts

1  
2  
3 **Using machine learning to incorporate sparse nutrition data into cardiovascular**  
4 **mortality risk prediction**  
5  
6  
7  
8  
9

10  
11  
12  
13 Joseph Rigdon, PhD\*

14  
15 Quantitative Sciences Unit, Stanford University School of Medicine,

16  
17 1070 Arastradero Road #3C3104, MC 5559

18  
19 Palo Alto, California 94304

20  
21 [jrigdon@stanford.edu](mailto:jrigdon@stanford.edu)  
22  
23  
24  
25  
26  
27

28 Sanjay Basu, MD, PhD

29  
30 Center for Primary Care, Harvard Medical School

31  
32 Research and Analytics, Collective Health

33  
34 School of Public Health, Imperial College London

35  
36 635 Huntington Avenue, 2<sup>nd</sup> floor

37  
38 Boston, MA 02115

39  
40 [sanjay\\_basu@hms.harvard.edu](mailto:sanjay_basu@hms.harvard.edu)  
41  
42  
43  
44  
45  
46

47 \*Denotes corresponding author  
48  
49  
50  
51  
52  
53  
54  
55  
56  
57  
58  
59  
60

## Abstract

**Objectives:** We aimed to test whether or not adding (i) nutrition predictor variables and/or (ii) using machine learning models improves cardiovascular death prediction versus standard Cox models without nutrition predictor variables

**Design:** Prospective study

**Setting:** Six waves of NHANES data collected from 1999-2011 linked to the National Death Index

**Participants:** 29,390 participants were included in the training set for model derivation and 12,600 were included in the test set for model evaluation. Our study sample was approximately 20% black race and 25% Hispanic ethnicity.

**Primary and Secondary Outcome Measures:** Time from NHANES interview until the minimum of time of cardiovascular death or censoring

**Results:** A standard risk model excluding nutrition data overestimated risk nearly two-fold [calibration slope of predicted versus true risk: 0.53 (95% CI: 0.49, 0.57)] with moderate discrimination [C-statistic: 0.87 (0.85, 0.88)]. Nutrition data alone, or machine learning alone, failed to improve performance, but both together improved calibration [slope: 1.08 (0.83, 1.33)] and discrimination [C-statistic: 0.93 (0.92, 0.94)].

**Conclusions:** Our results indicate that the inclusion of nutrition data with available machine learning algorithms can substantially improve cardiovascular risk prediction.

**Keywords:** Cardiovascular disease, machine learning, nutrition, risk prediction

**Word Count:** 3,167

## Article Summary

### Article focus

- Cardiovascular risk prediction models are commonplace in primary care medicine, and current models are built using Cox regression models with simple demographic and clinical variables
- Could using machine learning models and incorporating nutrition predictor variables improve cardiovascular risk prediction?

### Key messages

- Use of survival random forest models with nutrition variables can yield well-calibrated models whereas standard models overestimate risk nearly two-fold and can improve model discrimination from 87% to 93%
- This study supports the clinical scenario where a patient fills out a 24-hour dietary recall in the waiting room prior to seeing the physician, and this nutrition data is used in concert with a machine learning model to more accurately predict CVD risk

### Strengths and limitations of this study

- Nationally representative data with a comprehensive evaluation of nutrition, direct laboratory assessment of biomarkers, and direct examination of blood pressure
- Comprehensive follow-up with mortality adjudication by cause of death
- Limitations include the need to impute missing data, a short follow-up duration among individuals collected in the later waves of NHANES, and the lack of information about CVD events in addition to CVD mortality.

## Introduction

Nutrition is thought to be a major contributor to cardiovascular disease mortality risk<sup>1-4</sup>, but as yet is not explicitly incorporated into cardiovascular risk models that are used to guide clinical prescribing of statins and other preventive medications<sup>5-9</sup>. Nutrition is both imperfectly measured, typically through 24-hour dietary recalls, and nutrition data are sparse and multi-variable, with numerous metrics from individual kilocalorie intakes across a wide range of macro and micronutrients<sup>10,11</sup>, making it difficult to determine how an overall nutritional profile might be incorporated into clinical practice. Several groups have offered composite nutrition quality scores (e.g., the Healthy Eating Index and alternatives)<sup>12-14</sup>, which correlate to some degree with cardiovascular mortality<sup>15-22</sup> but have not yet been incorporated into common risk equations that use more traditional risk markers (e.g., systolic blood pressure)<sup>5</sup>. Optimizing cardiovascular disease risk prediction is important in clinical practice, because many modern clinical guidelines recommend that physicians prescribe therapies (such as statins, aspirin, and intensive blood pressure treatment) based in part on estimates of overall cardiovascular disease risk, not simply based on the levels of a single biomarker such as cholesterol or blood pressure levels, which fail to fully capture the influence of nutrition on risk<sup>23-26</sup>.

With modern machine learning methods, it may be possible to avoid the problems of composite indices, such as reducing a large amount of sparse data to a rough composite that does not explain substantial variation in observed risk<sup>27</sup>. Machine learning approaches are particularly adept at capturing a complex array of large data represented by the sparse matrices of nutrition variables, and incorporating interactions among the data variables (such as between different types of nutrients, e.g., different fats, different carbohydrates, etc.), and identify nonlinear relationships between risk factors and outcomes (e.g., increasing carbohydrate to a very high level from a medium level may

1  
2  
3 differ in impact than increasing from low to medium) that traditional regression models  
4 may not fully capture<sup>28–31</sup>. Additionally, with high-quality, more rapid 24-hour dietary  
5 recall techniques that can more comprehensively assess a person's dietary behaviors  
6 and link them to large nutritional databases, it is now possible to assess nutritional  
7 profiles in detail in the clinician's office or clinic waiting room<sup>32–35</sup>. It remains unclear,  
8 however, whether nutritional information from a 24-hour recall can add meaningful value  
9 to cardiovascular mortality risk prediction beyond biomarker values—such as lipid  
10 profile, blood pressure, and diabetes status—and whether using a machine learning  
11 approach can advance the predictive power of dietary recalls for cardiovascular risk  
12 assessment beyond composite indices already available.  
13  
14  
15  
16  
17  
18  
19  
20  
21  
22  
23  
24

25 Here, we use a 2-by-2 factorial experimental design to test two hypotheses using  
26 observational data: (i) that the data from a single 24-hour dietary recall can add  
27 substantial predictive value to cardiovascular mortality risk estimation beyond that  
28 afforded by standard biomarkers already included in traditional cardiovascular risk  
29 calculators; and (ii) that machine learning approaches to directly incorporate sparse  
30 matrices of nutrition data into risk estimates can be superior to standard regression  
31 models or the composite nutritional indices constructed through linear modeling methods  
32 in the past.  
33  
34  
35  
36  
37  
38  
39  
40  
41  
42  
43  
44  
45  
46

## 47 **Methods**

48  
49

50 We conducted a 2-by-2 factorial experiment in which we compared the calibration and  
51 discrimination of cardiovascular disease mortality risk prediction models with and without  
52 data from a 24-hour dietary recall, and with and without a machine learning approach.  
53  
54  
55  
56  
57  
58  
59  
60

### *Data Source*

Six waves of cross-sectional data from the National Health and Nutrition Examination Survey (NHANES, 1999-2000, 2001-2002, 2003-2004, 2005-2006, 2007-2008, and 2009-2010) were used to develop and validate the risk prediction models. The details of the NHANES sampling scheme are described elsewhere<sup>36</sup>. Briefly, NHANES is a survey including laboratory biomarkers and clinical examination, collected in two-year waves among children and adults, sampled to represent the non-institutionalized civilian U.S. population. Each observation within each wave was linked to the National Death Index (NDI, through 2011) by the Centers for Disease Control. The NDI provided data on the time of CVD death or censoring of follow-up, and additionally a variable attributing death to one of nine-cause specific categories (heart disease, cancer, chronic lower respiratory disease, cerebrovascular diseases, diabetes, pneumonia and influenza, Alzheimer's disease, kidney disease, and unintentional injuries).

The primary statistical outcome was defined as time from NHANES interview to the minimum of time of censoring or time of death from heart disease or cerebrovascular diseases, henceforth CVD mortality. Death from any other cause was treated as censored. Inclusion criteria were age 20-79 years old at time of interview with no prior CVD history. No actions were taken to blind assessment of predictors for the outcome and other predictors. No actions were taken to blind assessment of the outcome.

All potential predictors in the models were collected at time of NHANES interview to mimic a hypothetical scenario where a medical provider may want to conduct an in-clinic 24-hour dietary recall to improve prediction of CVD mortality. Demographic variables included age, sex, and race (Black race, Hispanic ethnicity), and currently-employed cardiovascular disease risk factors of total cholesterol (mg/dL), high-density lipoprotein



1  
2  
3 cholesterol (HDL; mg/dL), systolic blood pressure (mmHg), blood pressure treatment  
4 status (yes/no), diabetes status (yes/no), and current smoking status (yes/no)<sup>5</sup>. Nutrition  
5 variables included daily standardized intake of micronutrients (e.g., sodium, selenium)  
6 and macronutrients (e.g., fat, carbohydrates, protein) collected during a single 24-hour  
7 dietary recall following the NHANES interview (Supplementary Table A).  
8  
9  
10  
11  
12

### 13 14 15 16 *Patient and Public Involvement*

17 No patient involved.  
18  
19  
20  
21

### 22 *Model Development*

23  
24 Random samples of 70% of each NHANES wave were pooled to form the training  
25 sample from which the models were derived, with the remaining 30% prospectively held  
26 out to form the test set to assess performance of each model without refitting or  
27 recalibration. To train the models in the presence of missing data, 10 imputed data sets  
28 for the training sample were created using multiple imputation via chained equations<sup>37,38</sup>.  
29  
30  
31  
32  
33  
34  
35  
36

37 In one arm of the 2-by-2 design, we tested whether or not switching from the standard  
38 Cox proportional hazards model to a machine learning algorithm could improve  
39 calibration and discrimination. The machine learning algorithms tested were those  
40 commonly used for clinical event risk prediction for censored time-to-event data: survival  
41 gradient boosted machines (GBMs)<sup>39</sup> and survival random forests (RFs)<sup>40</sup>. Both of these  
42 machine learning approaches construct decision trees from data. In a typical decision  
43 tree, each branch of the tree divides the sampled study population into increasingly-  
44 smaller subgroups that differ in their probability of the outcome. A good decision tree will  
45 separate the sampled population into groups that have low within-group variability and  
46 high between-group variability in the probability of the outcome. GBMs average many  
47  
48  
49  
50  
51  
52  
53  
54  
55  
56  
57  
58  
59  
60

1  
2  
3 trees where errors made by the first tree contribute to learning of a less erroneous tree in  
4 the next iteration (a “boosting” strategy)<sup>41,42</sup>. RFs also build numerous decision trees, but  
5 average a forest composed of many trees, where each tree is independently fitted (a  
6 “bagging” strategy) with a random subset of covariates selected to be eligible to define  
7 the branches<sup>42–45</sup>. RFs use inverse probability of censoring weights to address  
8 censoring.  
9  
10  
11  
12  
13  
14  
15  
16  
17

18 In the second arm of the 2-by-2 design, we tested whether or not adding nutrition  
19 variables, including all micro and macronutrients assessed in the NHANES dietary recall,  
20 to the standard demographic and biomarker variables could improve prediction. We  
21 additional compare incorporating all nutrition data versus using common existing  
22 composite nutrition indices: the Healthy Eating Index (HEI)<sup>46</sup>, Alternate Healthy Eating  
23 Index (AHEI)<sup>47</sup>, Mediterranean Diet Score (MDS)<sup>48</sup>, and the Dietary Approaches to Stop  
24 Hypertension diet score (DASH)<sup>49</sup>.  
25  
26  
27  
28  
29  
30  
31  
32  
33  
34

35 In total, our 2-by-2 design contained 18 models in four quadrants (Supplementary Table  
36 B). The no machine learning, no nutrition (standard model) quadrant included only one  
37 model: a Cox regression model with demographics and biomarker variables. The  
38 machine learning, no nutrition quadrant included two models: a gradient boosted  
39 machine and a random forest, both using only demographics and biomarker variables.  
40  
41 The no machine learning, nutrition quadrant included five models: a Cox regression  
42 including demographics, biomarkers, and either HEI, AHEI, MDS, DASH, or all micro  
43 and macronutrients from NHANES. Finally, the machine learning, nutrition quadrant  
44 included 10 total models: gradient boosted machines or random forests including  
45 demographics, biomarkers, and either HEI, AHEI, MDS, DASH, or all micro and  
46 macronutrients from NHANES.  
47  
48  
49  
50  
51  
52  
53  
54  
55  
56  
57  
58  
59  
60

1  
2  
3  
4  
5 Cox regression models, a gradient boosted machine with 100 trees, a maximum tree  
6 depth of 1, and a learning rate of 0.1<sup>50</sup>, and a survival random forest based on 20  
7 conditional inference trees<sup>51,52</sup> were fit to each of the 10 imputed data sets. For the best  
8 performing model, we increased the number of trees from 20 to 500 to further improve  
9 model fit.  
10  
11  
12  
13  
14

### 15 16 17 18 *Outcome metrics*

19  
20 Model performance was assessed in terms of calibration (using the Greenwood-Nam-  
21 D'Agostino [GND] test) and discrimination (using the C-statistic). In the GND test, model  
22 predicted probability of 10-year CVD mortality risk was compared to actual death from  
23 CVD within 10 years after the NHANES interview by decile of predicted risk. A slope and  
24 intercept line were then drawn using these values across deciles of predicted risk, such  
25 that a calibration slope of 1 reflects perfect calibration (a perfect 45-degree line between  
26 predicted risk and actual event rates).  
27  
28  
29  
30  
31  
32  
33  
34  
35  
36

37 Model discrimination was assessed using the C-statistic (area under receiver operating  
38 characteristic [ROC] curve). Each point on the ROC curve was defined by the sensitivity  
39 (x-axis) and 1-specificity (y-axis) for a given cutpoint. The calculation of sensitivity and  
40 specificity followed from model predicted risk (above/below cutpoint) versus gold  
41 standard of outcome (whether or not CVD mortality happened within 10 years after  
42 NHANES interview). As with the GND statistics, C-statistics were calculated for each of  
43 the 10 imputed data sets and an overall C-statistic for each model was estimated by  
44 Rubin's rules.  
45  
46  
47  
48  
49  
50  
51  
52  
53  
54  
55  
56  
57  
58  
59  
60

1  
2  
3 Each model developed on imputed training data set  $k = 1, \dots, 10$  was applied to imputed  
4  
5 test set  $k=1, \dots, 10$  to avoid overlap between training data model development and test  
6  
7 set evaluation. Calibration and discrimination mean values and 95% confidence intervals  
8  
9 for each model were calculated using Rubin's rules to combine the 10 calibration values<sup>3</sup>  
10  
11 (one per imputed data set).  
12  
13

14  
15  
16 No model updating was done in this study, and no risk groups were created. There were  
17  
18 no differences in setting, eligibility criteria, outcome, or predictors between the training  
19  
20 (development) set and the test (validation) set. There was no need for participant  
21  
22 consent or Ethical Review Board approval as the data are publicly available. All  
23  
24 statistical analyses were carried out in Stata 15 software<sup>53</sup> and R version 3.5.1<sup>54</sup>.  
25  
26 This manuscript was written in accordance with the Transparent Reporting of a  
27  
28 Multivariable Prediction Model for Individual Prognosis or Diagnosis (TRIPOD)  
29  
30 recommendations<sup>55</sup>, summarized in Supplementary Table I. All data relevant to the study  
31  
32 are included in the article or uploaded as supplementary information, and statistical  
33  
34 code, and dataset (upon request) are available at  
35  
36 [https://github.com/joerigdon/CVD\\_Prediction](https://github.com/joerigdon/CVD_Prediction).  
37  
38  
39  
40  
41  
42

## 43 **Results**

### 44 *Descriptive statistics on the study sample*

45  
46  
47 Distributions of demographics, covariates and outcome rates were nearly equivalent in  
48  
49 training and test sets (Table 1). Of the  $n=29390$  individuals in the training set,  
50  
51 1171/29390 (4.0%) experienced CVD mortality within the follow-up period; of the  
52  
53  $n=12600$  in the test set, 515/12600 (4.1%) experienced CVD mortality. The median  
54  
55  
56  
57  
58  
59  
60

1  
2  
3 follow-up time was 79 months in both training and test sets, with a mean age of 50  
4 years, and 47% of the population being male, 20% Black, 26% Hispanic, 16% with  
5 diabetes, and 19% actively smoking tobacco. Composite nutrition indices were identical  
6 to within rounding error between the train and test datasets, with a mean HEI score of 47  
7 (out of 100<sup>46</sup>), AHEI score of 47 (out of 110<sup>47</sup>), MDS score of 5 (out of 10<sup>48</sup>), and DASH  
8 score of 47 (out of 80<sup>49</sup>); higher scores indicate better adherence to the recommended  
9 dietary guidelines for all four of the composite scores.  
10  
11  
12  
13  
14  
15  
16  
17  
18  
19

20 Compared to individuals without CVD mortality, individuals experiencing CVD mortality  
21 were older (74.3 vs. 49.0 years old), more likely to be male (55.0% vs. 46.9%), had  
22 higher systolic blood pressure (142.9 vs. 124.8 mmHg), were more likely to take blood  
23 pressure medications (74.2% vs. 30.8%), and were more likely to have diabetes (33.3%  
24 vs. 15.5%; Table 2). Regarding nutrition variables, those experiencing CVD mortality  
25 counter-intuitively had a higher HEI score (51.0 vs. 46.9), a higher AHEI score (48.0 vs.  
26 47.1), and a higher DASH score (48.1 vs. 47.4; Table 2), and comparable MDS scores  
27 (5.1 vs. 5.1).  
28  
29  
30  
31  
32  
33  
34  
35  
36  
37  
38

### 39 *Calibration and discrimination of standard models with and without nutrition data*

40 Using the standard approach to CVD risk prediction modeling<sup>5</sup>, a Cox proportional  
41 hazards model with variables of age, sex, Black race, and Hispanic ethnicity, total  
42 cholesterol, HDL cholesterol, systolic blood pressure, blood pressure medication,  
43 diabetes, and tobacco use, yielded a GND calibration slope of 0.53 (95% CI: 0.49, 0.57),  
44 reflecting profound risk over-estimation consistent with prior estimates<sup>56,57</sup>. Adding HEI,  
45 AHEI, MDS, or DASH score to the model did not change the calibration slope of 0.53,  
46 however the addition of the raw (not composite) 24-hour recall data decreased the slope  
47  
48  
49  
50  
51  
52  
53  
54  
55  
56  
57  
58  
59  
60

1  
2  
3 to 0.48 (0.44, 0.53), reflecting a worsening of over-estimation of risk (Figure 1,  
4  
5 Supplementary Table E).  
6  
7

8  
9 The exclusion or inclusion of nutrition data did not affect discrimination of the standard  
10  
11 Cox risk models. The Cox model with the above-mentioned non-nutrition data had a C-  
12  
13 statistic of 0.87 (0.85, 0.88) in the test set. Adding HEI, AHEI, MDS, DASH, or all raw 24-  
14  
15 hour recall data left the C-statistic unchanged at 0.87 (0.85, 0.88) (Figure 2,  
16  
17 Supplementary Table F).  
18  
19

### 20 21 22 *Calibration and discrimination of machine learning models with and without nutrition data*

23  
24 When using a machine learning GBM approach instead of a Cox proportional hazards  
25  
26 model, but still excluding nutrition data, model calibration improved to 0.54 (0.47, 0.61),  
27  
28 and when using random forest in place of Cox, the calibration improved further to 0.58  
29  
30 (0.49, 0.67). Adding nutrition variables improved the machine learning models'  
31  
32 calibration when raw 24-hour recall data were used, but not when composite dietary  
33  
34 indices were used. Adding HEI, AHEI, MDS, or DASH left the calibration slope  
35  
36 unchanged at 0.54 for the GBM models and minimally changed the calibration slope for  
37  
38 the random forest models from 0.58 to 0.59 or 0.60. The GBM model had the best  
39  
40 calibration when using all 24-hour recall data, producing a calibration slope of 0.56 (0.50,  
41  
42 0.62). The random forest model with raw 24-hour nutrition data was the only model for  
43  
44 which the 95% confidence intervals included the ideal value of 1, with a calibration slope  
45  
46 of 1.08 (0.83, 1.33) (Figure 1, Supplementary Table E).  
47  
48  
49

50  
51 Model discrimination also improved with use of machine learning. Using a GBM in place  
52  
53 of a Cox model improved discrimination slightly, from C-statistics of 0.87 (0.85, 0.88) in  
54  
55 Cox models to 0.88 (0.87, 0.89) for all GBM models without nutrition data and 0.91  
56  
57  
58  
59

1  
2  
3 (0.90, 0.93) for the random forest without nutrition data. The discrimination was not  
4 significantly different with the addition of composite nutritional indices, but did improve to  
5 0.93 (0.92, 0.94) with the addition of raw nutrition data (Figure 2, Supplementary Table  
6 F).  
7  
8  
9  
10

11  
12  
13 As expected, model calibration values (Supplementary Figure A, Supplementary Table  
14 C), and model discrimination values (Supplementary Figure B, Supplementary Table D)  
15 were better in the training data sets versus the held-out test set.  
16  
17  
18  
19  
20

21  
22 Cox model coefficients are detailed in Supplementary Table G and gradient boosted  
23 machine model relative influences are detailed in Supplementary Table H. Notable  
24 associations with cardiovascular death included age (HR for 1-year increase in age of  
25 1.1 [1.09, 1.1], female sex (HR vs. males of 0.62 [0.55, 0.71]), Hispanic ethnicity (HR vs.  
26 non-Hispanics of 0.72 [0.61, 0.86]), systolic BP (HR for 1-unit increase of 1.01 [1.01,  
27 1.01]), blood pressure medications (HR for each additional med of 1.22 [1.11, 1.34]),  
28 type 2 diabetes (HR vs. non-diabetics of 1.46 [1.23, 1.73]), and tobacco use (HR vs.  
29 non-users 1.82 [1.53, 2.17]) (Supplementary Table G). No associations with  
30 cardiovascular death were found with HEI, AHEI, MDS, or DASH.  
31  
32  
33  
34  
35  
36  
37  
38  
39  
40  
41  
42

43 In the comprehensive evaluation of all 24-hour nutrition variables, protective  
44 associations were seen with fiber (HR 0.97 [0.96, 0.99] for 1-gram increase) and niacin  
45 (HR 0.97 [0.95, 0.99] for 1-milligram increase), and harmful association with vitamin B6  
46 (HR 1.17 [1.02, 1.35] for 1-milligram increase). Relative influences in a GBM display  
47 how much of a 0-100 importance total is accounted for by each variable in the model  
48 (Supplementary Table H). Age consistently had relative influences of around 70/100,  
49 with the next most important variables being SBP (around 11), blood pressure  
50  
51  
52  
53  
54  
55  
56  
57  
58  
59  
60

1  
2  
3 medications (around 7), total cholesterol (around 3), diabetes (3), and sex (2). Of the  
4 composite indices, only HEI (1.92) exceeded a relative influence of 1. Of the 24-hour  
5 nutrition variables, only potassium (1.82) exceeded a relative influence of 1. Partial  
6 dependence plots for the random forest model with all nutrition variables reveal an  
7 exponential increase in 10-year probability of CVD death starting at about age 65, and  
8 an S-shaped risk curve for 10-year probability of CVD death with spike around 145  
9 mmHg systolic blood pressure (Supplementary Figure C)  
10  
11  
12  
13  
14  
15  
16  
17  
18  
19  
20

## 21 Discussion

22  
23  
24 We examined whether or not improvements in CVD mortality prediction could be  
25 achieved by including sparse nutrition data into models derived through machine  
26 learning algorithms. We observed that the addition of nutrition variables to a standard  
27 Cox proportional hazards model was not of substantial benefit alone, nor was the use of  
28 machine learning algorithms alone, but when both nutrition data and machine learning  
29 were combined, we could substantially improve risk prediction beyond the inclusion of  
30 standard demographics and biomarkers alone. Calibration particularly improved when  
31 both nutrition data and machine learning algorithms were used.  
32  
33  
34  
35  
36  
37  
38  
39  
40  
41  
42

43 Our findings are of clinical relevance as more rapid, automated or mobile device-based  
44 24-hour dietary recalls make it feasible to provide a nutrition profile for patients at or  
45 before visiting a doctor's office<sup>1,2</sup>, and as automated cardiovascular disease risk  
46 prediction models become an increasingly-important part of precision medicine  
47 guidelines that aim to improve the ability of medical practitioners to prescribe preventive  
48 cardiovascular treatments to patients with the highest risk<sup>6</sup>. As standard biomarkers fail  
49 to explain the full extent to which nutrition relates to cardiovascular mortality<sup>58,59</sup>,  
50  
51  
52  
53  
54  
55  
56  
57  
58  
59  
60



1  
2  
3 machine learning approaches that directly incorporate raw dietary data appear to have  
4 benefits over composite nutritional indices that may excessively reduce complexity in  
5 nutritional interactions and non-linear relationships that confer risk. Our study benefits  
6 from being conducted on a nationally representative sample of US adults, including a  
7 comprehensive evaluation of nutrition, direct laboratory assessment of biomarkers, direct  
8 examination of blood pressure, and comprehensive follow-up with mortality adjudication  
9 by cause of death. Nevertheless, our study has important limitations, including the need  
10 to impute missing data, a short follow-up duration among individuals collected in the later  
11 waves of NHANES, and the lack of information about CVD events in addition to CVD  
12 mortality.  
13  
14  
15  
16  
17  
18  
19  
20  
21  
22  
23  
24  
25

26 In the future, further research can assess whether the performance of rapid dietary  
27 recalls and associated cardiovascular risk estimation can be implemented in practice,  
28 whether the level of improvements to calibration and discrimination observed in this  
29 assessment produce clinically-meaningful changes in the level of prescribing of key  
30 preventive therapies for patients, and whether the difficulties of interpreting machine  
31 learning models are compared to traditional Cox-type risk models poses challenges to  
32 the acceptability of these models in clinical practice.  
33  
34  
35  
36  
37  
38  
39  
40  
41  
42

43 At present, our results indicate that the inclusion of nutrition data with available machine  
44 learning algorithms can substantially improve cardiovascular risk prediction.  
45  
46  
47  
48  
49  
50  
51  
52

### 53 **Author Contributions**

54  
55  
56  
57  
58  
59  
60

1  
2  
3 SB conceptualized the study and design and contributed to data preparation and  
4 analysis. JR contributed to data preparation and analysis. Both authors contributed to  
5 writing and critically reviewing the manuscript.  
6  
7  
8  
9

### 10 11 **Competing Interests statement**

12  
13 JR and SB have no competing interests to report.  
14

### 15 16 **Acknowledgements**

17  
18 The authors acknowledge two anonymous reviewers at the Stanford Quantitative  
19 Sciences Unit.  
20  
21  
22  
23

### 24 25 **Funding**

26 This work was supported by the National Institute On Minority Health And Health  
27 Disparities of the National Institutes of Health under Award Number DP2MD010478. The  
28 content is solely the responsibility of the authors and does not necessarily represent the  
29 official views of the National Institutes of Health.  
30  
31  
32  
33  
34  
35  
36

### 37 38 **References**

- 39  
40 1. Shivappa, N., Steck, S. E., Hussey, J. R., Ma, Y. & Hebert, J. R. Inflammatory  
41 potential of diet and all-cause, cardiovascular, and cancer mortality in National  
42 Health and Nutrition Examination Survey III Study. *Eur. J. Nutr.* **56**, 683–692 (2017).  
43  
44 2. Aune, D. *et al.* Fruit and vegetable intake and the risk of cardiovascular disease,  
45 total cancer and all-cause mortality—a systematic review and dose-response meta-  
46 analysis of prospective studies. *Int. J. Epidemiol.* **46**, 1029–1056 (2017).  
47  
48 3. Wang, D. D. *et al.* Association of Specific Dietary Fats With Total and Cause-  
49 Specific Mortality. *JAMA Intern. Med.* **176**, 1134–1145 (2016).  
50  
51  
52  
53  
54  
55  
56  
57  
58  
59  
60

- 1  
2  
3  
4 4. Langley-Evans, S. C. Nutrition in early life and the programming of adult disease: a  
5  
6 review. *J. Hum. Nutr. Diet.* **28**, 1–14 (2015).  
7
- 8  
9 5. Goff David C. *et al.* 2013 ACC/AHA Guideline on the Assessment of Cardiovascular  
10  
11 Risk. *Circulation* **129**, S49–S73 (2014).  
12
- 13  
14 6. Stone Neil J. *et al.* 2013 ACC/AHA Guideline on the Treatment of Blood Cholesterol  
15  
16 to Reduce Atherosclerotic Cardiovascular Risk in Adults. *Circulation* **129**, S1–S45  
17  
18 (2014).  
19
- 20  
21 7. Expert Panel on Detection, Evaluation, and Treatment of High Blood Cholesterol in  
22  
23 Adults. Executive Summary of the Third Report of the National Cholesterol  
24  
25 Education Program (NCEP) Expert Panel on Detection, Evaluation, and Treatment  
26  
27 of High Blood Cholesterol in Adults (Adult Treatment Panel III). *JAMA J. Am. Med.*  
28  
29 *Assoc.* **285**, 2486–2497 (2001).  
30
- 31  
32 8. Lloyd-Jones, D. M. *et al.* Prediction of Lifetime Risk for Cardiovascular Disease by  
33  
34 Risk Factor Burden at 50 Years of Age. *Circulation* **113**, 791–798 (2006).  
35
- 36  
37 9. Yadlowsky, S. *et al.* Clinical Implications of Revised Pooled Cohort Equations for  
38  
39 Estimating Atherosclerotic Cardiovascular Disease Risk. *Ann. Intern. Med.* **169**, 20  
40  
41 (2018).  
42
- 43  
44 10. Stumbo, P. Considerations for selecting a dietary assessment system. *J. Food*  
45  
46 *Compos. Anal. Off. Publ. U. N. Univ. Int. Netw. Food Data Syst.* **21**, S13–S19  
47  
48 (2008).  
49
- 50  
51 11. Stewart, K. K. & Whitaker, J. R. *Modern Methods of Food Analysis.* (Springer  
52  
53 Science & Business Media, 2012).  
54
- 55  
56 12. Kennedy, E. T., Ohls, J., Carlson, S. & Fleming, K. The Healthy Eating Index: Design  
57  
58 and Applications. *J. Am. Diet. Assoc.* **95**, 1103–1108 (1995).  
59  
60

- 1  
2  
3 13. McCullough, M. L. & Willett, W. C. Evaluating adherence to recommended diets in  
4  
5 adults: the Alternate Healthy Eating Index. *Public Health Nutr.* **9**, (2006).  
6
- 7 14. Panagiotakos, D. B., Pitsavos, C. & Stefanadis, C. Dietary patterns: A Mediterranean  
8  
9 diet score and its relation to clinical and biological markers of cardiovascular disease  
10  
11 risk. *Nutr. Metab. Cardiovasc. Dis.* **16**, 559–568 (2006).  
12
- 13 15. Reedy, J. *et al.* Higher Diet Quality Is Associated with Decreased Risk of All-Cause,  
14  
15 Cardiovascular Disease, and Cancer Mortality among Older Adults. *J. Nutr.* **144**,  
16  
17 881–889 (2014).  
18
- 19 16. Onvani, S., Haghghatdoost, F., Surkan, P. J., Larijani, B. & Azadbakht, L.  
20  
21 Adherence to the Healthy Eating Index and Alternative Healthy Eating Index dietary  
22  
23 patterns and mortality from all causes, cardiovascular disease and cancer: a meta-  
24  
25 analysis of observational studies. *J. Hum. Nutr. Diet.* **30**, 216–226 (2017).  
26  
27
- 28 17. Fung, T. T. *et al.* Mediterranean diet and incidence and mortality of coronary heart  
29  
30 disease and stroke in women. *Circulation* **119**, 1093–1100 (2009).  
31
- 32 18. Akbaraly, T. N. *et al.* Alternative Healthy Eating Index and mortality over 18 y of  
33  
34 follow-up: results from the Whitehall II cohort. *Am. J. Clin. Nutr.* **94**, 247–253 (2011).  
35  
36
- 37 19. Schwingshackl, L. & Hoffmann, G. Diet Quality as Assessed by the Healthy Eating  
38  
39 Index, the Alternate Healthy Eating Index, the Dietary Approaches to Stop  
40  
41 Hypertension Score, and Health Outcomes: A Systematic Review and Meta-Analysis  
42  
43 of Cohort Studies. *J. Acad. Nutr. Diet.* **115**, 780-800.e5 (2015).  
44
- 45 20. Kant, A. K. Indexes of Overall Diet Quality: A Review. *J. Am. Diet. Assoc.* **96**, 785–  
46  
47 791 (1996).  
48
- 49 21. Folsom, A. R., Parker, E. D. & Harnack, L. J. Degree of Concordance With DASH  
50  
51 Diet Guidelines and Incidence of Hypertension and Fatal Cardiovascular Disease.  
52  
53 *Am. J. Hypertens.* **20**, 225–232 (2007).  
54  
55  
56  
57  
58  
59

- 1  
2  
3 22. Fung, T. T. *et al.* Adherence to a DASH-Style Diet and Risk of Coronary Heart  
4 Disease and Stroke in Women. *Arch. Intern. Med.* **168**, 713–720 (2008).  
5  
6  
7 23. Grundy, S. M. *et al.* 2018  
8  
9 AHA/ACC/AACVPR/AAPA/ABC/ACPM/ADA/AGS/APhA/ASPC/NLA/PCNA  
10  
11 Guideline on the Management of Blood Cholesterol: A Report of the American  
12  
13 College of Cardiology/American Heart Association Task Force on Clinical Practice  
14  
15 Guidelines. *J. Am. Coll. Cardiol.* 25709 (2018). doi:10.1016/j.jacc.2018.11.003  
16  
17 24. Bibbins-Domingo, K. *et al.* Statin Use for the Primary Prevention of Cardiovascular  
18  
19 Disease in Adults: US Preventive Services Task Force Recommendation Statement.  
20  
21 *JAMA* **316**, 1997–2007 (2016).  
22  
23 25. Bibbins-Domingo, K. & on behalf of the U.S. Preventive Services Task Force. Aspirin  
24  
25 Use for the Primary Prevention of Cardiovascular Disease and Colorectal Cancer:  
26  
27 U.S. Preventive Services Task Force Recommendation Statement. *Ann. Intern. Med.*  
28  
29 **164**, 836 (2016).  
30  
31 26. Whelton, P. K. *et al.* 2017  
32  
33 ACC/AHA/AAPA/ABC/ACPM/AGS/APhA/ASH/ASPC/NMA/PCNA Guideline for the  
34  
35 Prevention, Detection, Evaluation, and Management of High Blood Pressure in  
36  
37 Adults. *J. Am. Coll. Cardiol.* **71**, e127–e248 (2018).  
38  
39 27. Suresh, S., Saraswathi, S. & Sundararajan, N. Performance enhancement of  
40  
41 extreme learning machine for multi-category sparse data classification problems.  
42  
43 *Eng. Appl. Artif. Intell.* **23**, 1149–1157 (2010).  
44  
45 28. Messina, M., Lampe, J. W., Birt, D. F., Appel, L. J. & al, et. Reductionism and the  
46  
47 narrowing nutrition perspective: Time for reevaluation and emphasis on food  
48  
49 synergy. *Am. Diet. Assoc. J. Am. Diet. Assoc. Chic.* **101**, 1416–9 (2001).  
50  
51 29. Wang, J., Li, D., Dangott, L. J. & Wu, G. Proteomics and Its Role in Nutrition  
52  
53 Research,. *J. Nutr.* **136**, 1759–1762 (2006).  
54  
55  
56  
57  
58  
59  
60

- 1  
2  
3 30. Marcos, A., Nova, E. & Montero, A. Changes in the immune system are conditioned  
4 by nutrition. *Eur. J. Clin. Nutr.* **57**, S66–S69 (2003).  
5  
6  
7 31. Zeisel, S. H. *et al.* Nutrition: A Reservoir for Integrative Science. *J. Nutr.* **131**, 1319–  
8 1321 (2001).  
9  
10  
11 32. Subar, A. F. *et al.* The Automated Self-Administered 24-Hour Dietary Recall  
12 (ASA24): A Resource for Researchers, Clinicians, and Educators from the National  
13 Cancer Institute. *J. Acad. Nutr. Diet.* **112**, 1134–1137 (2012).  
14  
15  
16 33. Vereecken, C. A., Covents, M., Matthys, C. & Maes, L. Young adolescents' nutrition  
17 assessment on computer (YANA-C). *Eur. J. Clin. Nutr.* **59**, 658–667 (2005).  
18  
19  
20 34. Hongu, N. *et al.* Dietary Assessment Tools Using Mobile Technology. *Top. Clin.*  
21 *Nutr.* **26**, 300 (2011).  
22  
23  
24 35. Thompson, F. E. *et al.* Comparison of Interviewer-Administered and Automated Self-  
25 Administered 24-Hour Dietary Recalls in 3 Diverse Integrated Health Systems. *Am.*  
26 *J. Epidemiol.* **181**, 970–978 (2015).  
27  
28  
29 36. NHANES - About the National Health and Nutrition Examination Survey. (2017).  
30 Available at: [https://www.cdc.gov/nchs/nhanes/about\\_nhanes.htm](https://www.cdc.gov/nchs/nhanes/about_nhanes.htm). (Accessed: 11th  
31 March 2019)  
32  
33  
34 37. van Buuren, S. & Groothuis-Oudshoorn, K. mice: Multivariate Imputation by Chained  
35 Equations in R. *J. Stat. Softw.* **45**, 1–67 (2011).  
36  
37  
38 38. Vergouwe, Y., Royston, P., Moons, K. G. M. & Altman, D. G. Development and  
39 validation of a prediction model with missing predictor data: a practical approach. *J.*  
40 *Clin. Epidemiol.* **63**, 205–214 (2010).  
41  
42  
43 39. Chen, Y., Jia, Z., Mercola, D. & Xie, X. A Gradient Boosting Algorithm for Survival  
44 Analysis via Direct Optimization of Concordance Index. *Computational and*  
45 *Mathematical Methods in Medicine* (2013). doi:10.1155/2013/873595  
46  
47  
48  
49  
50  
51  
52  
53  
54  
55  
56  
57  
58  
59  
60

- 1  
2  
3 40. Ishwaran, H., Kogalur, U. B., Blackstone, E. H. & Lauer, M. S. Random survival  
4 forests. *Ann. Appl. Stat.* **2**, 841–860 (2008).  
5  
6  
7 41. Friedman, J. H. Stochastic gradient boosting. *Comput. Stat. Data Anal.* **38**, 367–378  
8 (2002).  
9  
10  
11 42. Friedman, J. H. Greedy Function Approximation: A Gradient Boosting Machine. *Ann.*  
12 *Stat.* **29**, 1189–1232 (2001).  
13  
14  
15 43. Quinlan, J. R. Induction of decision trees. *Mach. Learn.* **1**, 81–106 (1986).  
16  
17  
18 44. Breiman, L. Random Forests. *Mach. Learn.* **45**, 5–32 (2001).  
19  
20 45. Friedman, J., Hastie, T. & Tibshirani, R. Additive logistic regression: a statistical view  
21 of boosting (With discussion and a rejoinder by the authors). *Ann. Stat.* **28**, 337–407  
22 (2000).  
23  
24  
25 46. Guenther, P. M. *et al.* Update of the Healthy Eating Index: HEI-2010. *J. Acad. Nutr.*  
26 *Diet.* **113**, 569–580 (2013).  
27  
28  
29 47. Chiuve, S. E. *et al.* Alternative Dietary Indices Both Strongly Predict Risk of Chronic  
30 Disease. *J. Nutr.* **142**, 1009–1018 (2012).  
31  
32  
33 48. Trichopoulou, A., Costacou, T., Bamia, C. & Trichopoulos, D. Adherence to a  
34 Mediterranean Diet and Survival in a Greek Population. *N. Engl. J. Med.* **348**, 2599–  
35 2608 (2003).  
36  
37  
38 49. Günther, A. L. B. *et al.* Association Between the Dietary Approaches to Hypertension  
39 Diet and Hypertension in Youth With Diabetes Mellitus. *Hypertension* **53**, 6–12  
40 (2009).  
41  
42  
43 50. Greenwell, B., Boehmke, B., Cunningham, J. & Developers ([https://github.com/gbm-](https://github.com/gbm-developers)  
44 [developers](https://github.com/gbm-developers)), G. B. M. *gbm: Generalized Boosted Regression Models.* (2019).  
45  
46  
47 51. Hothorn, T., Bühlmann, P., Dudoit, S., Molinaro, A. & Van Der Laan, M. J. Survival  
48 ensembles. *Biostatistics* **7**, 355–373 (2006).  
49  
50  
51  
52  
53  
54  
55  
56  
57  
58  
59  
60

- 1  
2  
3 52. Hothorn, T., Hornik, K., Strobl, C. & Zeileis, A. *party: A Laboratory for Recursive*  
4  
5 *Partytioning*. (2019).  
6  
7 53. StataCorp. *Stata Statistical Software: Release 15*. (StataCorp LLC, 2017).  
8  
9 54. R Core Team. *R: A language and environment for statistical computing*. (2018).  
10  
11 55. Collins, G. S., Reitsma, J. B., Altman, D. G. & Moons, K. G. M. Transparent  
12 Reporting of a multivariable prediction model for Individual Prognosis Or Diagnosis  
13 (TRIPOD): The TRIPOD Statement. *Ann. Intern. Med.* **162**, 55 (2015).  
14  
15 56. Yadlowsky, S. *et al.* Clinical Implications of Revised Pooled Cohort Equations for  
16 Estimating Atherosclerotic Cardiovascular Disease Risk. *Ann. Intern. Med.* (2018).  
17 doi:10.7326/M17-3011  
18  
19 57. Ridker, P. M. & Cook, N. R. Statins: new American guidelines for prevention of  
20 cardiovascular disease. *The Lancet* **382**, 1762–1765 (2013).  
21  
22 58. Kant, A. K. Dietary patterns: biomarkers and chronic disease risk This paper is one of  
23 a selection of papers published in the CSCN–CSNS 2009 Conference, entitled Are  
24 dietary patterns the best way to make nutrition recommendations for chronic disease  
25 prevention? *Appl. Physiol. Nutr. Metab.* **35**, 199–206 (2010).  
26  
27 59. Boushey, C. J., Coulston, A. M., Rock, C. L. & Mosen, E. *Nutrition in the Prevention*  
28 *and Treatment of Disease*. (Elsevier, 2001).  
29  
30  
31  
32  
33  
34  
35  
36  
37  
38  
39  
40  
41

## 42 Figure Legends

43  
44 **Figure 1:** Calibration slopes and confidence intervals of models in the hold-out test set  
45 (National Health and Nutrition Examination Survey, 1999-2010 linked to the 2011  
46 National Death Index, N= 12600). All models included demographic variables age, sex,  
47 and race (Black race, Hispanic ethnicity). ACC=American College of Cardiology  
48 covariates of total cholesterol (mg/dL), high-density lipoprotein cholesterol (HDL; mg/dL),  
49 systolic blood pressure (mmHg), blood pressure treatment status (yes/no), diabetes  
50 status (yes/no), and current smoking status (yes/no), HEI=healthy eating index,  
51 AHEI=alternative healthy eating index, MDS=Mediterranean diet score, DASH=dietary  
52 approaches to stop hypertension diet score, GBM=gradient boosted machine,  
53 RF=random forest  
54  
55  
56  
57  
58  
59  
60



**Figure 2:** Model discrimination (C-statistic) in the hold-out test set (National Health and Nutrition Examination Survey, 1999-2010 linked to the 2011 National Death Index, N=12600). All models included demographic variables age, sex, and race (Black race, Hispanic ethnicity). ACC=American College of Cardiology covariates of total cholesterol (mg/dL), high-density lipoprotein cholesterol (HDL; mg/dL), systolic blood pressure (mmHg), blood pressure treatment status (yes/no), diabetes status (yes/no), and current smoking status (yes/no), HEI=healthy eating index, AHEI=alternative healthy eating index, MDS=Mediterranean diet score, DASH=dietary approaches to stop hypertension diet score, GBM=gradient boosted machine, RF=random forest

### Tables

**Table 1:** Descriptive statistics on the study sample (National Health and Nutrition Examination Survey, 1999-2010 linked to the 2011 National Death Index, N=41990). Statistics are grouped to reflect participants in the training (n=29390/41990 = 70%) or test (n=12600/41990 = 30%) data subsets. CVD = cardiovascular disease, HEI=healthy eating index, AHEI=alternative healthy eating index, MDS=Mediterranean diet score, DASH=dietary approaches to stop hypertension diet score, GBM=gradient boosted machine, RF=random forest. Mean ( $\pm$ standard deviation) reported for continuous variables and N (%) reported for categorical variables.

|                                          | <b>Training data<br/>for model<br/>derivation</b><br>n=29390 | <b>Test data for<br/>model<br/>evaluation</b><br>n=12600 | <b>P-value<br/>for<br/>difference<sup>1</sup></b> |
|------------------------------------------|--------------------------------------------------------------|----------------------------------------------------------|---------------------------------------------------|
| <b>CVD death</b>                         |                                                              |                                                          |                                                   |
| No                                       | 28,219<br>(96.0%)                                            | 12,085 (95.9%)                                           | 0.63                                              |
| Yes                                      | 1,171 (4.0%)                                                 | 515 (4.1%)                                               |                                                   |
| <b>Time since interview<br/>(months)</b> | 79.3 ( $\pm$ 41.5)                                           | 79.5 ( $\pm$ 41.4)                                       | 0.71                                              |
| <b>Wave</b>                              |                                                              |                                                          |                                                   |
| 99-00                                    | 3,810 (13.0%)                                                | 1,633 (13.0%)                                            | 1.00                                              |
| 01-02                                    | 8,853 (30.1%)                                                | 3,795 (30.1%)                                            |                                                   |
| 03-04                                    | 3,926 (13.4%)                                                | 1,684 (13.4%)                                            |                                                   |
| 05-06                                    | 3,891 (13.2%)                                                | 1,669 (13.2%)                                            |                                                   |
| 07-08                                    | 4,353 (14.8%)                                                | 1,866 (14.8%)                                            |                                                   |
| 09-10                                    | 4,557 (15.5%)                                                | 1,953 (15.5%)                                            |                                                   |
| <b>Age</b>                               | 50.1 ( $\pm$ 20.4)                                           | 50.0 ( $\pm$ 20.4)                                       | 0.55                                              |
| <b>Sex</b>                               |                                                              |                                                          |                                                   |
| Male                                     | 13,870<br>(47.2%)                                            | 5,941 (47.2%)                                            | 0.94                                              |
| Female                                   | 15,520<br>(52.8%)                                            | 6,659 (52.8%)                                            |                                                   |
| <b>Black</b>                             |                                                              |                                                          |                                                   |
| No                                       | 14,826<br>(50.4%)                                            | 6,316 (50.1%)                                            | 0.35                                              |
| Yes                                      | 5,839 (19.9%)                                                | 2,554 (20.3%)                                            |                                                   |
| Missing                                  | 8,725 (29.7%)                                                | 3,730 (29.6%)                                            |                                                   |
| <b>Hispanic</b>                          |                                                              |                                                          |                                                   |
| No                                       | 21,861<br>(74.4%)                                            | 9,369 (74.4%)                                            | 0.96                                              |

|                                                     | <b>Training data<br/>for model<br/>derivation</b> | <b>Test data for<br/>model<br/>evaluation</b> | <b>P-value<br/>for<br/>difference<sup>1</sup></b> |
|-----------------------------------------------------|---------------------------------------------------|-----------------------------------------------|---------------------------------------------------|
| Yes                                                 | 7,529 (25.6%)                                     | 3,231 (25.6%)                                 |                                                   |
| <b>Total chol</b>                                   | 197.8 (±42.9)                                     | 198.5 (±44.3)                                 | 0.33                                              |
| Missing                                             | 3,640 (12.4%)                                     | 1,485 (11.8%)                                 |                                                   |
| <b>HDL</b>                                          | 45.6 (±23.0)                                      | 45.4 (±22.9)                                  | 0.63                                              |
| Missing                                             | 3,641 (12.4%)                                     | 1,486 (11.8%)                                 |                                                   |
| <b>SBP</b>                                          | 125.5 (±20.8)                                     | 125.4 (±20.7)                                 | 0.81                                              |
| Missing                                             | 3,166 (10.8%)                                     | 1,357 (10.8%)                                 |                                                   |
| <b>DBP</b>                                          | 69.8 (±12.7)                                      | 69.9 (±12.5)                                  | 0.58                                              |
| Missing                                             | 3,377 (11.5%)                                     | 1,428 (11.3%)                                 |                                                   |
| <b>Number of blood<br/>pressure<br/>medications</b> |                                                   |                                               |                                                   |
| 0                                                   | 19,855<br>(67.6%)                                 | 8,473 (67.2%)                                 | 0.66                                              |
| 1                                                   | 7,875 (26.8%)                                     | 3,428 (27.2%)                                 |                                                   |
| 2 or more                                           | 1,660 (5.6%)                                      | 699 (5.5%)                                    |                                                   |
| <b>T2DM</b>                                         |                                                   |                                               |                                                   |
| No                                                  | 10,560<br>(35.9%)                                 | 4,518 (35.9%)                                 | 0.18                                              |
| Yes                                                 | 4,695 (16.0%)                                     | 2,096 (16.6%)                                 |                                                   |
| Missing                                             | 14,135<br>(48.1%)                                 | 5,986 (47.5%)                                 |                                                   |
| <b>Smoking</b>                                      |                                                   |                                               |                                                   |
| No                                                  | 23,713<br>(80.7%)                                 | 10,246 (81.3%)                                | 0.14                                              |
| Yes                                                 | 5,675 (19.3%)                                     | 2,354 (18.7%)                                 |                                                   |
| Missing                                             | 2 (0.0%)                                          | 0 (0.0%)                                      |                                                   |
| <b>HEI</b>                                          | 47.0 (±11.0)                                      | 47.1 (±11.0)                                  | 0.58                                              |
| Missing                                             | 3,274 (11.1%)                                     | 1,364 (10.8%)                                 |                                                   |
| <b>AHEI</b>                                         | 47.2 (±11.0)                                      | 47.1 (±11.1)                                  | 0.59                                              |
| Missing                                             | 3,258 (11.1%)                                     | 1,358 (10.8%)                                 |                                                   |
| <b>MDS</b>                                          | 5.1 (±1.2)                                        | 5.1 (±1.2)                                    | 0.70                                              |
| Missing                                             | 3,270 (11.1%)                                     | 1,368 (10.9%)                                 |                                                   |
| <b>DASH</b>                                         | 47.4 (±9.3)                                       | 47.4 (±9.4)                                   | 0.77                                              |
| Missing                                             | 8,700 (29.6%)                                     | 3,796 (30.1%)                                 |                                                   |

<sup>1</sup>Wilcoxon rank sum test for continuous variables, e.g., age, and Fisher's exact test for categorical variables, e.g., black race

**Table 2:** Comparisons of participant characteristics by outcome (National Health and Nutrition Examination Survey, 1999-2010 linked to the 2011 National Death Index, N=41990). Descriptive summary of variables in those participants without CVD event (n=40304) vs. those with a CVD event (n=1686) during the follow-up period. Mean (±standard deviation) reported for continuous variables and N (%) reported for categorical variables.

|                                             | <b>No CVD</b>  | <b>CVD</b>    | <b>P-value for difference<sup>1</sup></b> |
|---------------------------------------------|----------------|---------------|-------------------------------------------|
|                                             | n=40304        | n=1686        |                                           |
| <b>Time since interview (months)</b>        | 80.3 (±41.4)   | 55.7 (±34.9)  | <0.0001                                   |
| <b>Wave</b>                                 |                |               |                                           |
| 99-00                                       | 5,168 (12.8%)  | 275 (16.3%)   | <0.0001                                   |
| 01-02                                       | 11,681 (29.0%) | 967 (57.4%)   |                                           |
| 03-04                                       | 5,401 (13.4%)  | 209 (12.4%)   |                                           |
| 05-06                                       | 5,451 (13.5%)  | 109 (6.5%)    |                                           |
| 07-08                                       | 6,127 (15.2%)  | 92 (5.5%)     |                                           |
| 09-10                                       | 6,476 (16.1%)  | 34 (2.0%)     |                                           |
| <b>Age</b>                                  | 49.0 (±20.1)   | 74.3 (±11.9)  | <0.0001                                   |
| <b>Sex</b>                                  |                |               |                                           |
| Male                                        | 18,883 (46.9%) | 928 (55.0%)   | <0.0001                                   |
| Female                                      | 21,421 (53.1%) | 758 (45.0%)   |                                           |
| <b>Black</b>                                |                |               |                                           |
| No                                          | 20,005 (49.6%) | 1,137 (67.4%) | <0.0001                                   |
| Yes                                         | 8,110 (20.1%)  | 283 (16.8%)   |                                           |
| Missing                                     | 12,189 (30.2%) | 266 (15.8%)   |                                           |
| <b>Hispanic</b>                             |                |               |                                           |
| No                                          | 29,781 (73.9%) | 1,449 (85.9%) | <0.0001                                   |
| Yes                                         | 10,523 (26.1%) | 237 (14.1%)   |                                           |
| <b>Total chol</b>                           | 198.1 (±43.2)  | 196.2 (±47.0) | 0.10                                      |
| Missing                                     | 4,670 (11.6%)  | 455 (27.0%)   |                                           |
| <b>HDL</b>                                  | 45.5 (±23.0)   | 45.0 (±24.2)  | 0.002                                     |
| Missing                                     | 4,672 (11.6%)  | 455 (27.0%)   |                                           |
| <b>SBP</b>                                  | 124.8 (±20.3)  | 142.9 (±26.8) | <0.0001                                   |
| Missing                                     | 4,114 (10.2%)  | 409 (24.3%)   |                                           |
| <b>DBP</b>                                  | 70.0 (±12.5)   | 67.5 (±14.7)  | <0.0001                                   |
| Missing                                     | 4,359 (10.8%)  | 446 (26.5%)   |                                           |
| <b>Number of blood pressure medications</b> |                |               |                                           |
| 0                                           | 27,894 (69.2%) | 434 (25.7%)   | <0.0001                                   |
| 1                                           | 10,205 (25.3%) | 1,098 (65.1%) |                                           |
| 2                                           | 2,205 (5.5%)   | 154 (9.1%)    |                                           |
| <b>T2DM</b>                                 |                |               |                                           |
| No                                          | 14,680 (36.4%) | 398 (23.6%)   | <0.0001                                   |
| Yes                                         | 6,229 (15.5%)  | 562 (33.3%)   |                                           |
| Missing                                     | 19,395 (48.1%) | 726 (43.1%)   |                                           |
| <b>Smoking</b>                              |                |               |                                           |
| No                                          | 32,508 (80.7%) | 1,451 (86.1%) | <0.0001                                   |
| Yes                                         | 7,794 (19.3%)  | 235 (13.9%)   |                                           |
| Missing                                     | 2 (0.0%)       | 0 (0.0%)      |                                           |
| <b>HEI</b>                                  | 46.9 (±11.0)   | 51.0 (±10.3)  | <0.0001                                   |
| Missing                                     | 4,179 (10.4%)  | 459 (27.2%)   |                                           |
| <b>AHEI</b>                                 | 47.1 (±11.1)   | 48.0 (±10.9)  | 0.006                                     |
| Missing                                     | 4,158 (10.3%)  | 458 (27.2%)   |                                           |
| <b>MDS</b>                                  | 5.1 (±1.2)     | 5.1 (±1.2)    | 0.10                                      |
| Missing                                     | 4,472 (11.1%)  | 166 (9.8%)    |                                           |

|             | No CVD         | CVD         | P-value for difference <sup>1</sup> |
|-------------|----------------|-------------|-------------------------------------|
| <b>DASH</b> | 47.4 (±9.4)    | 48.1 (±9.2) | 0.01                                |
| Missing     | 11,774 (29.2%) | 722 (42.8%) |                                     |

<sup>1</sup>Wilcoxon rank sum test for continuous variables, e.g., age, and Fisher's exact test for categorical variables, e.g., black race

For peer review only

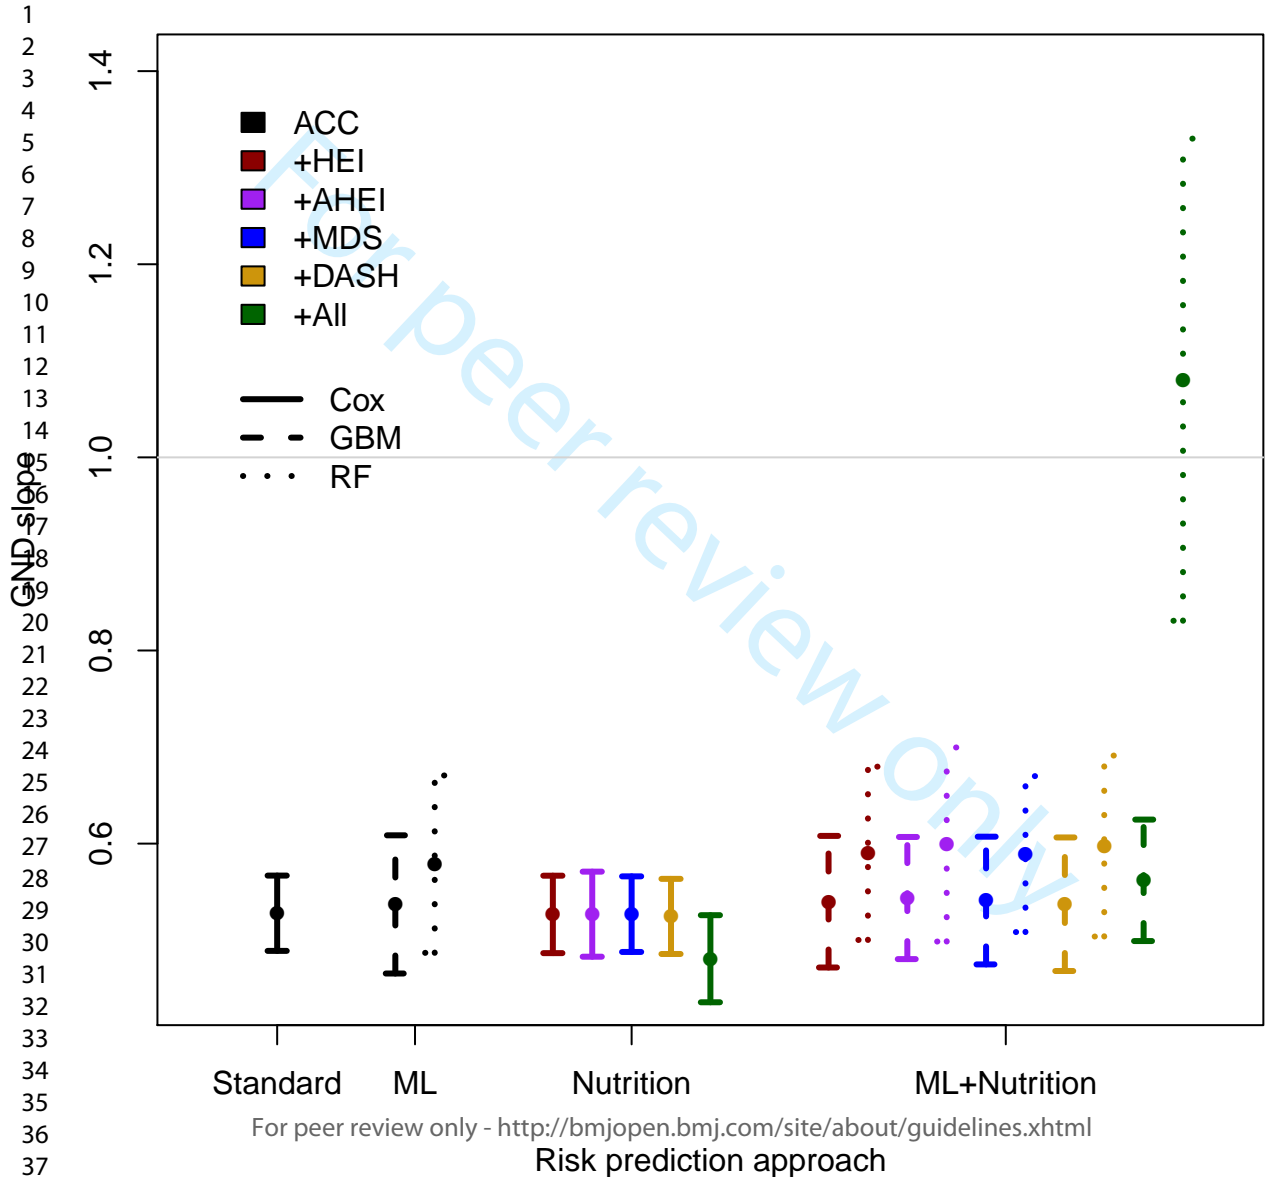

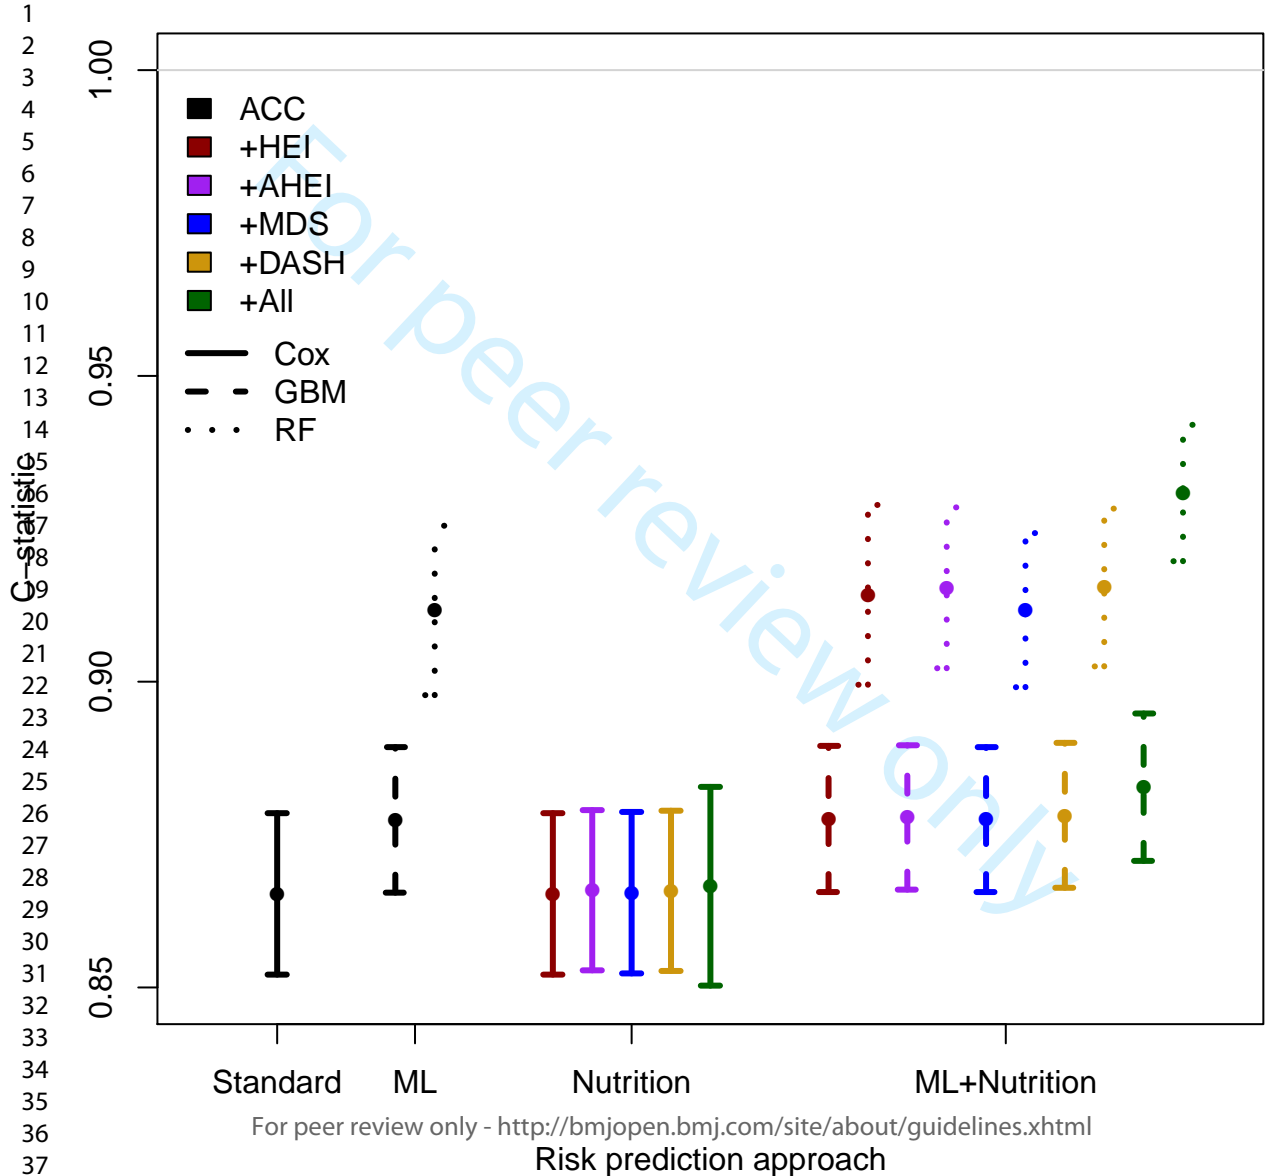

## Supplementary Appendix

### Figure Legends

**Supplementary Figure A:** Calibration slopes and confidence intervals of models in training set (National Health and Nutrition Examination Survey, 1999-2010 linked to the 2011 National Death Index, N= 12600). All models included demographic variables age, sex, and race (Black race, Hispanic ethnicity). ACC=American College of Cardiology covariates of total cholesterol (mg/dL), high-density lipoprotein cholesterol (HDL; mg/dL), systolic blood pressure (mmHg), blood pressure treatment status (yes/no), diabetes status (yes/no), and current smoking status (yes/no), HEI=healthy eating index, AHEI=alternative healthy eating index, MDS=Mediterranean diet score, DASH=dietary approaches to stop hypertension diet score, GBM=gradient boosted machine, RF=random forest

**Supplementary Figure B:** Model discrimination (C-statistic) in training set (National Health and Nutrition Examination Survey, 1999-2010 linked to the 2011 National Death Index, N= 12600). All models included demographic variables age, sex, and race (Black race, Hispanic ethnicity). ACC=American College of Cardiology covariates of total cholesterol (mg/dL), high-density lipoprotein cholesterol (HDL; mg/dL), systolic blood pressure (mmHg), blood pressure treatment status (yes/no), diabetes status (yes/no), and current smoking status (yes/no), HEI=healthy eating index, AHEI=alternative healthy eating index, MDS=Mediterranean diet score, DASH=dietary approaches to stop hypertension diet score, GBM=gradient boosted machine, RF=random forest

**Supplementary Figure C:** Partial dependence plots for best model (500 trees using full data) for (a) age and (b) systolic blood pressure. Plots estimated by averaging model predictions for 1000 random samples from the training data at each decile of age or SBP.

**Supplementary Table A:** List of all predictor variables included in statistical models

| Variable name                            | Definition                                                                                                              |
|------------------------------------------|-------------------------------------------------------------------------------------------------------------------------|
| <b>Demographic and risk factors (4)</b>  |                                                                                                                         |
| age                                      | Age in years                                                                                                            |
| sex                                      | Sex (0 if male, 1 if female)                                                                                            |
| black                                    | Black race (0 if no, 1 if yes)                                                                                          |
| hispanic                                 | Hispanic ethnicity (0 if no, 1 if yes)                                                                                  |
| <b>ACC covariates (7)</b>                |                                                                                                                         |
| total_chol                               | Total cholesterol (mg/dL)                                                                                               |
| hdl                                      | HDL cholesterol (mg/dL)                                                                                                 |
| sbp                                      | Systolic blood pressure (mmHg)                                                                                          |
| dbp                                      | Diastolic blood pressure (mmHg)                                                                                         |
| bpmeds                                   | Number of blood pressure medications                                                                                    |
| dm                                       | Type 2 diabetes (0 if no, 1 if yes)                                                                                     |
| tob                                      | Current smoking (0 if no, 1 if yes)                                                                                     |
| <b>Composite nutrition variables (4)</b> |                                                                                                                         |
| hei                                      | Healthy eating index (0-100)                                                                                            |
| ahei                                     | Alternative healthy eating index (0-110)                                                                                |
| mids                                     | Mediterranean diet score (0-9)                                                                                          |
| dash                                     | DASH diet score (0-80)                                                                                                  |
| <b>24-hour recall variables (103)</b>    |                                                                                                                         |
| milk_g                                   | Milk and milk drinks (g)                                                                                                |
| cream_g                                  | Creams and cream substitutes (g)                                                                                        |
| milk_dessert_g                           | Milk desserts, sauces, gravies (g)                                                                                      |
| cheese_g                                 | Cheeses (g)                                                                                                             |
| meat_ns_g                                | Meat, not specified as to type (g)                                                                                      |
| beef_g                                   | Beef (g)                                                                                                                |
| pork_g                                   | Pork (g)                                                                                                                |
| lamb_g                                   | Lamb, veal, game, other carcass meat (g)                                                                                |
| poultry_g                                | Poultry (g)                                                                                                             |
| organ_meat_g                             | Organ meats, sausages, and lunchmeats, and meat spreads (g)                                                             |
| fish_g                                   | Fish and shellfish (g)                                                                                                  |
| meat_nonmeat_g                           | Meat, poultry, fish with nonmeat items (g)                                                                              |
| protein_frozen_g                         | Protein and shelf-stable plate meals, soups, and gravies with meat, poultry fish base; gelatin and gelatin-based drinks |
| eggs_g                                   | Eggs (g)                                                                                                                |
| egg_mixture_g                            | Egg mixtures (g)                                                                                                        |
| egg_sub_g                                | Egg substitutes (g)                                                                                                     |
| egg_frozen_g                             | Frozen plate meals with egg as major ingredient (g)                                                                     |
| legumes_g                                | Legumes (g)                                                                                                             |
| nuts_g                                   | Nuts, nut butters, and nut mixtures (g)                                                                                 |
| seeds_g                                  | Seeds and seed mixtures (g)                                                                                             |
| carob_g                                  | Carob products (g)                                                                                                      |
| flour_mix_g                              | Flour and dry mixes (g)                                                                                                 |
| bread_yeast_g                            | Yeast breads, rolls (g)                                                                                                 |



|    |                   |                                                                                        |
|----|-------------------|----------------------------------------------------------------------------------------|
| 1  |                   |                                                                                        |
| 2  |                   |                                                                                        |
| 3  | bread_quick_g     | Quick breads (g)                                                                       |
| 4  | pastries_g        | Cakes, cookies, pies, pastries, bars (g)                                               |
| 5  | crackers_g        | Crackers and salty snacks from grain products (g)                                      |
| 6  |                   |                                                                                        |
| 7  | pancakes_g        | Pancakes, waffles, French toast, other grain products (g)                              |
| 8  |                   |                                                                                        |
| 9  | pastas_g          | Pastas, cooked cereals, rice (g)                                                       |
| 10 | cereals_g         | Cereals, not cooked or not specified as to cooked (g)                                  |
| 11 |                   |                                                                                        |
| 12 | grain_mix_g       | Grain mixtures, frozen plate meals, soups (g)                                          |
| 13 |                   |                                                                                        |
| 14 | meat_sub_g        | Meat substitutes, mainly cereal protein (g)                                            |
| 15 | citrus_g          | Citrus fruits, juices (g)                                                              |
| 16 | fruit_dried_g     | Dried fruits (g)                                                                       |
| 17 | fruit_other_g     | Other fruits (g)                                                                       |
| 18 | fruit_juice_g     | Fruit juices and nectars excluding citrus (g)                                          |
| 19 | fruit_baby_g      | Fruit and juices baby food (g)                                                         |
| 20 | potatoes_g        | White potatoes and Puerto Rican starchy vegetables (g)                                 |
| 21 |                   |                                                                                        |
| 22 | veg_darkgreen_g   | Dark-green vegetables (g)                                                              |
| 23 | veg_deeptyellow_g | Deep-yellow vegetables (g)                                                             |
| 24 | tomatoes_g        | Tomatoes and tomato mixtures (g)                                                       |
| 25 | veg_other_g       | Other vegetables (g)                                                                   |
| 26 | veg_baby_g        | Vegetables and mixtures mostly vegetables baby food (g)                                |
| 27 |                   |                                                                                        |
| 28 | veg_meat_g        | Vegetables with meat, poultry, fish (g)                                                |
| 29 | veg_mixture_g     | Mixtures mostly vegetables without meat, poultry, fish (g)                             |
| 30 |                   |                                                                                        |
| 31 | fats_g            | Fats (g)                                                                               |
| 32 | oils_g            | Oils (g)                                                                               |
| 33 | salad_dressing_g  | Salad dressings (g)                                                                    |
| 34 | sweets_g          | Sugars and sweets (g)                                                                  |
| 35 | bev_nonalcohol_g  | Nonalcoholic beverages (g)                                                             |
| 36 | bev_alcohol_g     | Alcoholic beverages (g)                                                                |
| 37 | water_g           | Water, noncarbonated (g)                                                               |
| 38 | bev_nutrition_g   | Formulated nutrition beverages, energy drinks, sports drinks, functional beverages (g) |
| 39 |                   |                                                                                        |
| 40 |                   |                                                                                        |
| 41 | kcal              | Energy (kcal)                                                                          |
| 42 | protein_g         | Protein (g)                                                                            |
| 43 | carb_g            | Carbohydrates (g)                                                                      |
| 44 | fiber_g           | Fiber (g)                                                                              |
| 45 | fat_g             | Fat (g)                                                                                |
| 46 | fat_sat_g         | Saturated fats (g)                                                                     |
| 47 | fat_mono_g        | Monounsaturated fats (g)                                                               |
| 48 | fat_poly_g        | Polyunsaturated fats (g)                                                               |
| 49 | cholesterol_mg    | Cholesterol (mg)                                                                       |
| 50 | vite_mg           | Vitamin-E as alpha-tocopherol (mg)                                                     |
| 51 | vita_mcg          | Vitamin A, RAE (mcg)                                                                   |
| 52 | betacaro_mcg      | Beta-carotene (mcg)                                                                    |
| 53 | vitb1_mg          | Thiamin (Vitamin B1) (mg)                                                              |
| 54 |                   |                                                                                        |
| 55 |                   |                                                                                        |
| 56 |                   |                                                                                        |
| 57 |                   |                                                                                        |
| 58 |                   |                                                                                        |
| 59 |                   |                                                                                        |
| 60 |                   |                                                                                        |

|    |                    |                                       |
|----|--------------------|---------------------------------------|
| 1  |                    |                                       |
| 2  |                    |                                       |
| 3  | vitb2_mg           | Riboflavin (Vitamin B2) (mg)          |
| 4  | niacin_mg          | Niacin (mg)                           |
| 5  | vitb6_mg           | Vitamin B6 (mg)                       |
| 6  | folate_mcg         | Total folate (mcg)                    |
| 7  | vitb12_mcg         | Vitamin B12 (mcg)                     |
| 8  | vitc_mg            | Vitamin C (mg)                        |
| 9  | calcium_mg         | Calcium (mg)                          |
| 10 | phosphorus_mg      | Phosphorus (mg)                       |
| 11 | magnesium_mg       | Magnesium (mg)                        |
| 12 | iron_mg            | Iron (mg)                             |
| 13 | zinc_mg            | Zinc (mg)                             |
| 14 | copper_mg          | Copper (mg)                           |
| 15 | sodium_mg          | Sodium (mg)                           |
| 16 | potassium_mg       | Potassium (mg)                        |
| 17 | selenium_mcg       | Selenium (mg)                         |
| 18 | caffeine_mg        | Caffeine (mg)                         |
| 19 | theobromine_mg     | Theobromine (mg)                      |
| 20 | alcohol_gm         | Alcohol (gm)                          |
| 21 | sfa_40_gm          | SFA 4:0 (Butanoic) (g)                |
| 22 | sfa_60_gm          | SFA 6:0 (Hexanoic) (g)                |
| 23 | sfa_80_gm          | SFA 8:0 (Octanoic) (g)                |
| 24 | sfa_100_gm         | SFA 10:0 (Decanoic) (g)               |
| 25 | sfa_120_gm         | SFA 12:0 (Dodecanoic) (g)             |
| 26 | sfa_140_gm         | SFA 14:0 (Tetradecanoic) (g)          |
| 27 | sfa_160_gm         | SFA 16:0 (Hexadecanoic) (g)           |
| 28 | sfa_180_gm         | SFA 18:0 (Octadecanoic) (g)           |
| 29 | mfa_161h_gm        | MFA 16:1 (Hexadecanoic) (g)           |
| 30 | mfa_161o_gm        | MFA 16:1 (Octadecanoic) (g)           |
| 31 | mfa_201_gm         | MFA 20:1 (Eicosenoic) (g)             |
| 32 | mfa_221_gm         | MFA 22:1 (Docosenoic) (g)             |
| 33 | pfa_182_gm         | PFA 18:2 (Octadecadienoic) (g)        |
| 34 | pfa_183_gm         | PFA 18:3 (Octadecatrienoic) (g)       |
| 35 | pfa_184_gm         | PFA 18:4 (Octadecatetraenoic) (g)     |
| 36 | pfa_204_gm         | PFA 20:4 (Eicosatetraenoic) (g)       |
| 37 | pfa_205_gm         | PFA 20:5 (Eicosapentaenoic) (g)       |
| 38 | pfa_225_gm         | PFA 22:5 (Docosapentaenoic) (g)       |
| 39 | pfa_226_gm         | PFA 22:6 (Docosahexaenoic) (g)        |
| 40 | water_yesterday_gm | Total plain water drank yesterday (g) |
| 41 |                    |                                       |
| 42 |                    |                                       |
| 43 |                    |                                       |
| 44 |                    |                                       |
| 45 |                    |                                       |
| 46 |                    |                                       |
| 47 |                    |                                       |
| 48 |                    |                                       |
| 49 |                    |                                       |
| 50 |                    |                                       |
| 51 |                    |                                       |
| 52 |                    |                                       |
| 53 |                    |                                       |
| 54 |                    |                                       |
| 55 |                    |                                       |
| 56 |                    |                                       |
| 57 |                    |                                       |
| 58 |                    |                                       |
| 59 |                    |                                       |
| 60 |                    |                                       |

**Supplementary Table B:** Outline of prediction models assessed

|                                |                                               | <b>Standard</b>         | <b>Machine learning</b>     |                           |
|--------------------------------|-----------------------------------------------|-------------------------|-----------------------------|---------------------------|
|                                |                                               | A. Cox regression model | B. Gradient boosted machine | C. Survival random forest |
| <b>Standard</b>                | 1. Demographics, ACC                          | Model 1A                | Model 1B                    | Model 1C                  |
| <b>Add nutrition variables</b> | 2. Demographics, ACC, HEI                     | Model 2A                | Model 2B                    | Model 2C                  |
|                                | 3. Demographics, ACC, AHEI                    | Model 3A                | Model 3B                    | Model 3C                  |
|                                | 4. Demographics, ACC, Med diet score          | Model 4A                | Model 4B                    | Model 4C                  |
|                                | 5. Demographics, ACC, DASH diet score         | Model 5A                | Model 5B                    | Model 5C                  |
|                                | 6. Demographics, ACC, all 24-hour recall data | Model 6A                | Model 6B                    | Model 6C                  |

**Supplementary Table C:** Calibration slopes and confidence intervals on the training data

|                                 |                                            | <b>Standard</b>   | <b>Machine learning</b> |                   |
|---------------------------------|--------------------------------------------|-------------------|-------------------------|-------------------|
|                                 |                                            | Cox model         | GBM                     | Random forest     |
| <b>Standard</b>                 | Demographics, ACC                          | 0.52 (0.50, 0.54) | 0.55 (0.51, 0.60)       | 0.74 (0.52, 0.95) |
| <b>Plus nutrition variables</b> | Demographics, ACC, HEI                     | 0.52 (0.50, 0.54) | 0.55 (0.51, 0.60)       | 0.76 (0.52, 1.00) |
|                                 | Demographics, ACC, AHEI                    | 0.52 (0.50, 0.54) | 0.56 (0.51, 0.60)       | 0.76 (0.53, 0.98) |
|                                 | Demographics, ACC, Med diet score          | 0.51 (0.49, 0.54) | 0.55 (0.51, 0.60)       | 0.75 (0.54, 0.97) |
|                                 | Demographics, ACC, DASH diet score         | 0.52 (0.50, 0.53) | 0.55 (0.50, 0.60)       | 0.76 (0.53, 1.00) |
|                                 | Demographics, ACC, all 24-hour recall data | 0.54 (0.51, 0.57) | 0.57 (0.53, 0.62)       | 1.13 (0.73, 1.52) |

**Supplementary Table D: C-statistics on the training data**

| Standard                 |                                            | Standard          | Machine learning  |                   |
|--------------------------|--------------------------------------------|-------------------|-------------------|-------------------|
|                          |                                            | Cox model         | GBM               | Random forest     |
|                          | Demographics, ACC                          | 0.87 (0.86, 0.88) | 0.88 (0.87, 0.89) | 0.97 (0.96, 0.98) |
|                          | Demographics, ACC, HEI                     | 0.87 (0.86, 0.88) | 0.88 (0.87, 0.89) | 0.97 (0.97, 0.98) |
|                          | Demographics, ACC, AHEI                    | 0.87 (0.86, 0.88) | 0.88 (0.87, 0.89) | 0.97 (0.97, 0.98) |
|                          | Demographics, ACC, Med diet score          | 0.87 (0.86, 0.88) | 0.88 (0.87, 0.89) | 0.97 (0.97, 0.98) |
| Plus nutrition variables | Demographics, ACC, DASH diet score         | 0.87 (0.86, 0.88) | 0.88 (0.87, 0.89) | 0.97 (0.97, 0.98) |
|                          | Demographics, ACC, all 24-hour recall data | 0.88 (0.88, 0.89) | 0.88 (0.88, 0.89) | 0.99 (0.99, 0.99) |

**Supplementary Table E: Calibration slopes and confidence intervals on the held-out test data**

| Standard                 |                                            | Standard          | Machine learning  |                                |
|--------------------------|--------------------------------------------|-------------------|-------------------|--------------------------------|
|                          |                                            | Cox model         | GBM               | Random forest                  |
|                          | Demographics, ACC                          | 0.53 (0.49, 0.57) | 0.54 (0.47, 0.61) | 0.58 (0.49, 0.67)              |
|                          | Demographics, ACC, HEI                     | 0.53 (0.49, 0.57) | 0.54 (0.47, 0.61) | 0.59 (0.50, 0.68)              |
|                          | Demographics, ACC, AHEI                    | 0.53 (0.48, 0.57) | 0.54 (0.48, 0.61) | 0.60 (0.50, 0.70)              |
|                          | Demographics, ACC, Med diet score          | 0.53 (0.49, 0.57) | 0.54 (0.47, 0.61) | 0.59 (0.51, 0.67)              |
| Plus nutrition variables | Demographics, ACC, DASH diet score         | 0.52 (0.49, 0.56) | 0.54 (0.47, 0.61) | 0.60 (0.50, 0.69)              |
|                          | Demographics, ACC, all 24-hour recall data | 0.48 (0.44, 0.53) | 0.56 (0.50, 0.62) | 1.08 (0.83, 1.33) <sup>1</sup> |

<sup>1</sup>Model built using 500 trees; 20-tree model had slope 0.88 (0.69, 1.07)

**Supplementary Table F: C-statistics on the held out test data**

|                                 |                                            | Standard          | Machine learning  |                                |
|---------------------------------|--------------------------------------------|-------------------|-------------------|--------------------------------|
|                                 |                                            | Cox model         | GBM               | Random forest                  |
| <b>Standard</b>                 | Demographics, ACC                          | 0.87 (0.85, 0.88) | 0.88 (0.87, 0.89) | 0.91 (0.90, 0.93)              |
|                                 | Demographics, ACC, HEI                     | 0.87 (0.85, 0.88) | 0.88 (0.87, 0.89) | 0.91 (0.90, 0.93)              |
| <b>Plus nutrition variables</b> | Demographics, ACC, AHEI                    | 0.87 (0.85, 0.88) | 0.88 (0.87, 0.89) | 0.92 (0.90, 0.93)              |
|                                 | Demographics, ACC, Med diet score          | 0.87 (0.85, 0.88) | 0.88 (0.87, 0.89) | 0.91 (0.90, 0.92)              |
|                                 | Demographics, ACC, DASH diet score         | 0.87 (0.85, 0.88) | 0.88 (0.87, 0.89) | 0.92 (0.90, 0.93)              |
|                                 | Demographics, ACC, all 24-hour recall data | 0.87 (0.85, 0.88) | 0.88 (0.87, 0.89) | 0.93 (0.92, 0.94) <sup>1</sup> |

<sup>1</sup>Model built using 500 trees; 20-tree model had C-statistic 0.90 (0.89, 0.92)

**Supplementary Table G: Hazard ratios (95% CIs) from Cox models developed on training data. Estimates of hazard ratios and confidence intervals estimated using Rubin's rules, combining results from the 10 imputed training sets. See Supplementary Table A for variable definitions.**

|              | Model 1 (ACC)     | Model 2 (+HEI)    | Model 3 (+AHEI)   | Model 4 (+MDS)    | Model 5 (+DASH)   | Model 6 (+All)    |
|--------------|-------------------|-------------------|-------------------|-------------------|-------------------|-------------------|
| age          | 1.1 (1.09, 1.1)   | 1.1 (1.09, 1.1)   | 1.1 (1.09, 1.1)   | 1.1 (1.09, 1.1)   | 1.1 (1.09, 1.1)   | 1.09 (1.09, 1.1)  |
| sex          | 0.62 (0.55, 0.71) | 0.62 (0.55, 0.71) | 0.62 (0.55, 0.7)  | 0.62 (0.55, 0.71) | 0.62 (0.55, 0.71) | 0.56 (0.49, 0.64) |
| black        | 1.06 (0.9, 1.26)  | 1.07 (0.91, 1.26) | 1.08 (0.91, 1.27) | 1.07 (0.91, 1.26) | 1.05 (0.89, 1.24) | 1.03 (0.85, 1.23) |
| hispanic     | 0.72 (0.61, 0.86) | 0.72 (0.61, 0.86) | 0.73 (0.61, 0.86) | 0.72 (0.61, 0.86) | 0.73 (0.61, 0.86) | 0.65 (0.54, 0.79) |
| total_chol   | 1 (0.99, 1)       | 1 (0.99, 1)       | 1 (0.99, 1)       | 1 (0.99, 1)       | 1 (0.99, 1)       | 1 (0.99, 1)       |
| hdl          | 1 (1, 1)          | 1 (1, 1)          | 1 (1, 1)          | 1 (1, 1)          | 1 (1, 1)          | 1 (1, 1)          |
| sbp          | 1.01 (1.01, 1.01) | 1.01 (1.01, 1.01) | 1.01 (1.01, 1.01) | 1.01 (1.01, 1.01) | 1.01 (1.01, 1.01) | 1.01 (1.01, 1.01) |
| bpmeds       | 1.22 (1.11, 1.34) | 1.22 (1.11, 1.34) | 1.22 (1.11, 1.34) | 1.22 (1.11, 1.34) | 1.21 (1.1, 1.33)  | 1.24 (1.12, 1.37) |
| dm           | 1.46 (1.23, 1.73) | 1.48 (1.26, 1.74) | 1.47 (1.25, 1.73) | 1.48 (1.25, 1.74) | 1.46 (1.24, 1.72) | 1.38 (1.16, 1.63) |
| tob          | 1.82 (1.53, 2.17) | 1.82 (1.52, 2.17) | 1.8 (1.51, 2.14)  | 1.82 (1.53, 2.17) | 1.78 (1.49, 2.13) | 1.72 (1.42, 2.07) |
| hei          |                   | 1 (0.99, 1.01)    |                   |                   |                   |                   |
| ahei         |                   |                   | 1 (0.99, 1)       |                   |                   |                   |
| mhs          |                   |                   |                   | 1.02 (0.97, 1.08) |                   |                   |
| dash         |                   |                   |                   |                   | 0.99 (0.98, 1)    |                   |
| milk_g       |                   |                   |                   |                   |                   | 1 (1, 1)          |
| cream_g      |                   |                   |                   |                   |                   | 1 (0.99, 1)       |
| milk_desse   |                   |                   |                   |                   |                   | 1 (1, 1)          |
| rt_g         |                   |                   |                   |                   |                   |                   |
| cheese_g     |                   |                   |                   |                   |                   | 1 (1, 1)          |
| meat_ns_g    |                   |                   |                   |                   |                   | 1 (0.99, 1.02)    |
| beef_g       |                   |                   |                   |                   |                   | 1 (1, 1)          |
| pork_g       |                   |                   |                   |                   |                   | 1 (1, 1)          |
| lamb_g       |                   |                   |                   |                   |                   | 1 (1, 1)          |
| poultry_g    |                   |                   |                   |                   |                   | 1 (1, 1)          |
| organ_meat_g |                   |                   |                   |                   |                   | 1 (1, 1)          |
| fish_g       |                   |                   |                   |                   |                   | 1 (0.99, 1)       |
| meat_nonm    |                   |                   |                   |                   |                   | 1 (1, 1)          |
| eat_g        |                   |                   |                   |                   |                   |                   |
| protein_fro  |                   |                   |                   |                   |                   | 1 (1, 1)          |
| zen_g        |                   |                   |                   |                   |                   |                   |
| eggs_g       |                   |                   |                   |                   |                   | 1 (1, 1)          |
| egg_mixtur   |                   |                   |                   |                   |                   | 1 (1, 1)          |
| e_g          |                   |                   |                   |                   |                   |                   |
| egg_sub_g    |                   |                   |                   |                   |                   | 1 (0.99, 1)       |
| legumes_g    |                   |                   |                   |                   |                   | 1 (1, 1)          |
| nuts_g       |                   |                   |                   |                   |                   | 1 (1, 1)          |
| seeds_g      |                   |                   |                   |                   |                   | 1 (0.99, 1.01)    |

|    | Model 1<br>(ACC) | Model 2<br>(+HEI) | Model 3<br>(+AHEI) | Model 4<br>(+MDS) | Model 5<br>(+DASH) | Model 6<br>(+All) |
|----|------------------|-------------------|--------------------|-------------------|--------------------|-------------------|
| 1  |                  |                   |                    |                   |                    | 0.94 (0, ∞)       |
| 2  |                  |                   |                    |                   |                    | 0.39 (0, ∞)       |
| 3  |                  |                   |                    |                   |                    |                   |
| 4  |                  |                   |                    |                   |                    |                   |
| 5  |                  |                   |                    |                   |                    |                   |
| 6  |                  |                   |                    |                   |                    | 1 (1, 1)          |
| 7  |                  |                   |                    |                   |                    | 1 (1, 1)          |
| 8  |                  |                   |                    |                   |                    | 1 (1, 1)          |
| 9  |                  |                   |                    |                   |                    | 1 (1, 1)          |
| 10 |                  |                   |                    |                   |                    | 1 (1, 1)          |
| 11 |                  |                   |                    |                   |                    | 1 (1, 1)          |
| 12 |                  |                   |                    |                   |                    | 1 (1, 1)          |
| 13 |                  |                   |                    |                   |                    | 1 (1, 1)          |
| 14 |                  |                   |                    |                   |                    | 0.91 (0, ∞)       |
| 15 |                  |                   |                    |                   |                    | 1 (1, 1)          |
| 16 |                  |                   |                    |                   |                    | 1 (1, 1.01)       |
| 17 |                  |                   |                    |                   |                    | 1 (1, 1)          |
| 18 |                  |                   |                    |                   |                    | 1 (1, 1)          |
| 19 |                  |                   |                    |                   |                    | 1 (0.99, 1.02)    |
| 20 |                  |                   |                    |                   |                    | 1 (1, 1)          |
| 21 |                  |                   |                    |                   |                    | 1 (1, 1)          |
| 22 |                  |                   |                    |                   |                    | 1 (1, 1.01)       |
| 23 |                  |                   |                    |                   |                    | 1 (1, 1)          |
| 24 |                  |                   |                    |                   |                    | 1 (1, 1)          |
| 25 |                  |                   |                    |                   |                    | 1 (1, 1)          |
| 26 |                  |                   |                    |                   |                    | 0.8 (0, ∞)        |
| 27 |                  |                   |                    |                   |                    | 1 (1, 1)          |
| 28 |                  |                   |                    |                   |                    | 1 (1, 1)          |
| 29 |                  |                   |                    |                   |                    | 1 (0.99, 1.01)    |
| 30 |                  |                   |                    |                   |                    | 1.01 (0.99, 1.03) |
| 31 |                  |                   |                    |                   |                    | 1 (1, 1.01)       |
| 32 |                  |                   |                    |                   |                    | 1 (1, 1)          |
| 33 |                  |                   |                    |                   |                    | 1 (1, 1)          |
| 34 |                  |                   |                    |                   |                    | 1 (1, 1)          |
| 35 |                  |                   |                    |                   |                    | 1 (1, 1)          |
| 36 |                  |                   |                    |                   |                    | 1 (1, 1)          |
| 37 |                  |                   |                    |                   |                    | 1 (1, 1)          |
| 38 |                  |                   |                    |                   |                    | 1 (1, 1)          |
| 39 |                  |                   |                    |                   |                    | 1.01 (1, 1.02)    |
| 40 |                  |                   |                    |                   |                    | 1 (1, 1.01)       |
| 41 |                  |                   |                    |                   |                    | 0.97 (0.96, 0.99) |
| 42 |                  |                   |                    |                   |                    | 1 (0.97, 1.03)    |
| 43 |                  |                   |                    |                   |                    | 1.06 (0.91, 1.23) |
| 44 |                  |                   |                    |                   |                    | 1 (0.94, 1.07)    |
| 45 |                  |                   |                    |                   |                    | 1 (0.96, 1.03)    |
| 46 |                  |                   |                    |                   |                    | 1 (1, 1)          |
| 47 |                  |                   |                    |                   |                    | 0.99 (0.97, 1.01) |
| 48 |                  |                   |                    |                   |                    | 1 (1, 1)          |
| 49 |                  |                   |                    |                   |                    | 1 (1, 1)          |
| 50 |                  |                   |                    |                   |                    | 1.05 (0.81, 1.35) |
| 51 |                  |                   |                    |                   |                    | 1.07 (0.85, 1.34) |
| 52 |                  |                   |                    |                   |                    | 0.97 (0.95, 0.99) |
| 53 |                  |                   |                    |                   |                    | 1.17 (1.02, 1.35) |
| 54 |                  |                   |                    |                   |                    | 1 (1, 1)          |
| 55 |                  |                   |                    |                   |                    | 1 (0.98, 1.02)    |
| 56 |                  |                   |                    |                   |                    | 1 (1, 1)          |
| 57 |                  |                   |                    |                   |                    | 1 (1, 1)          |
| 58 |                  |                   |                    |                   |                    | 1 (1, 1)          |
| 59 |                  |                   |                    |                   |                    | 1 (1, 1)          |
| 60 |                  |                   |                    |                   |                    | 1 (1, 1)          |

|                    | Model 1<br>(ACC) | Model 2<br>(+HEI) | Model 3<br>(+AHEI) | Model 4<br>(+MDS) | Model 5<br>(+DASH) | Model 6<br>(+All)     |
|--------------------|------------------|-------------------|--------------------|-------------------|--------------------|-----------------------|
| iron_mg            |                  |                   |                    |                   |                    | 1 (0.98, 1.02)        |
| zinc_mg            |                  |                   |                    |                   |                    | 1.01 (1, 1.03)        |
| copper_mg          |                  |                   |                    |                   |                    | 0.86 (0.66, 1.11)     |
| sodium_mg          |                  |                   |                    |                   |                    | 1 (1, 1)              |
| potassium_mg       |                  |                   |                    |                   |                    | 1 (1, 1)              |
| selenium_mcg       |                  |                   |                    |                   |                    | 1 (1, 1)              |
| caffeine_mg        |                  |                   |                    |                   |                    | 1 (1, 1)              |
| theobromine_mg     |                  |                   |                    |                   |                    | 1 (1, 1)              |
| alcohol_gm         |                  |                   |                    |                   |                    | 1.01 (1, 1.02)        |
| sfa_40_gm          |                  |                   |                    |                   |                    | 1.4 (0.6, 3.27)       |
| sfa_60_gm          |                  |                   |                    |                   |                    | 0.58 (0.13, 2.64)     |
| sfa_80_gm          |                  |                   |                    |                   |                    | 1.2 (0.4, 3.59)       |
| sfa_100_gm         |                  |                   |                    |                   |                    | 0.75 (0.16, 3.51)     |
| sfa_120_gm         |                  |                   |                    |                   |                    | 1.01 (0.85, 1.2)      |
| sfa_140_gm         |                  |                   |                    |                   |                    | 0.9 (0.59, 1.37)      |
| sfa_160_gm         |                  |                   |                    |                   |                    | 0.95 (0.79, 1.14)     |
| sfa_180_gm         |                  |                   |                    |                   |                    | 0.96 (0.79, 1.17)     |
| mfa_161h_gm        |                  |                   |                    |                   |                    | 0.95 (0.71, 1.26)     |
| mfa_161o_gm        |                  |                   |                    |                   |                    | 1 (0.95, 1.06)        |
| mfa_201_gm         |                  |                   |                    |                   |                    | 1.12 (0.81, 1.54)     |
| mfa_221_gm         |                  |                   |                    |                   |                    | 0.67 (0.24, 1.87)     |
| pfa_182_gm         |                  |                   |                    |                   |                    | 1.04 (0.99, 1.09)     |
| pfa_183_gm         |                  |                   |                    |                   |                    | 0.84 (0.66, 1.07)     |
| pfa_184_gm         |                  |                   |                    |                   |                    | 0.05 (0, 39.37)       |
| pfa_204_gm         |                  |                   |                    |                   |                    | 0.28 (0.05, 1.61)     |
| pfa_205_gm         |                  |                   |                    |                   |                    | 0.34 (0.04, 2.66)     |
| pfa_225_gm         |                  |                   |                    |                   |                    | 27.42 (0.19, 3905.43) |
| pfa_226_gm         |                  |                   |                    |                   |                    | 2.91 (0.52, 16.29)    |
| water_yesterday_gm |                  |                   |                    |                   |                    | 1 (1, 1)              |

**Supplementary Table H:** Relative influences of variables in GBM models, averaged across the 10 imputed training sets. See Supplementary Table A for variable definitions.

|            | Model 1<br>(ACC) | Model 2<br>(+HEI) | Model 3<br>(+AHEI) | Model 4<br>(+MDS) | Model 5<br>(+DASH) | Model 6<br>(+All) |
|------------|------------------|-------------------|--------------------|-------------------|--------------------|-------------------|
| age        | 70.98            | 70.79             | 70.84              | 71.41             | 71.02              | 66.58             |
| sex        | 2.44             | 2.38              | 2.42               | 2.50              | 2.32               | 2.02              |
| black      | 0.00             | 0.00              | 0.00               | 0.00              | 0.00               | 0.00              |
| hispanic   | 0.01             | 0.02              | 0.01               | 0.00              | 0.01               | 0.00              |
| total_chol | 3.60             | 3.48              | 3.47               | 3.30              | 3.60               | 2.16              |
| hdl        | 0.42             | 0.37              | 0.45               | 0.41              | 0.33               | 0.05              |
| sbp        | 11.81            | 10.62             | 11.83              | 11.84             | 11.70              | 8.42              |
| bpmeds     | 7.45             | 7.35              | 7.32               | 7.29              | 7.50               | 6.49              |
| dm         | 3.06             | 2.85              | 3.11               | 2.99              | 2.90               | 2.61              |
| tob        | 0.23             | 0.23              | 0.27               | 0.26              | 0.26               | 0.00              |
| hei        |                  | 1.92              |                    |                   |                    |                   |
| ahei       |                  |                   | 0.28               |                   |                    |                   |
| mfs        |                  |                   |                    | 0.00              |                    |                   |
| dash       |                  |                   |                    |                   | 0.35               |                   |
| milk_g     |                  |                   |                    |                   |                    | 0.08              |
| cream_g    |                  |                   |                    |                   |                    | 0.09              |
| milk_desse |                  |                   |                    |                   |                    | 0.17              |
| rt_g       |                  |                   |                    |                   |                    |                   |

1  
2  
3  
4  
5  
6  
7  
8  
9  
10  
11  
12  
13  
14  
15  
16  
17  
18  
19  
20  
21  
22  
23  
24  
25  
26  
27  
28  
29  
30  
31  
32  
33  
34  
35  
36  
37  
38  
39  
40  
41  
42  
43  
44  
45  
46  
47  
48  
49  
50  
51  
52  
53  
54  
55  
56  
57  
58  
59  
60

|                  | Model 1<br>(ACC) | Model 2<br>(+HEI) | Model 3<br>(+AHEI) | Model 4<br>(+MDS) | Model 5<br>(+DASH) | Model 6<br>(+All) |
|------------------|------------------|-------------------|--------------------|-------------------|--------------------|-------------------|
| cheese_g         |                  |                   |                    |                   |                    | 0.00              |
| meat_ns_g        |                  |                   |                    |                   |                    | 0.29              |
| beef_g           |                  |                   |                    |                   |                    | 0.00              |
| pork_g           |                  |                   |                    |                   |                    | 0.14              |
| lamb_g           |                  |                   |                    |                   |                    | 0.08              |
| poultry_g        |                  |                   |                    |                   |                    | 0.00              |
| organ_meat_g     |                  |                   |                    |                   |                    | 0.00              |
| fish_g           |                  |                   |                    |                   |                    | 0.02              |
| meat_nonm        |                  |                   |                    |                   |                    | 0.00              |
| eat_g            |                  |                   |                    |                   |                    |                   |
| protein_frozen_g |                  |                   |                    |                   |                    | 0.00              |
| eggs_g           |                  |                   |                    |                   |                    | 0.03              |
| egg_mixture_g    |                  |                   |                    |                   |                    | 0.00              |
| egg_sub_g        |                  |                   |                    |                   |                    | 0.23              |
| legumes_g        |                  |                   |                    |                   |                    | 0.12              |
| nuts_g           |                  |                   |                    |                   |                    | 0.09              |
| seeds_g          |                  |                   |                    |                   |                    | 0.34              |
| carob_g          |                  |                   |                    |                   |                    | 0.00              |
| flour_mixture_g  |                  |                   |                    |                   |                    | 0.00              |
| bread_yeast_g    |                  |                   |                    |                   |                    | 0.16              |
| bread_quick_g    |                  |                   |                    |                   |                    | 0.03              |
| pastries_g       |                  |                   |                    |                   |                    | 0.08              |
| crackers_g       |                  |                   |                    |                   |                    | 0.06              |
| pancakes_g       |                  |                   |                    |                   |                    | 0.00              |
| pastas_g         |                  |                   |                    |                   |                    | 0.13              |
| cereals_g        |                  |                   |                    |                   |                    | 0.00              |
| grain_mixture_g  |                  |                   |                    |                   |                    | 0.00              |
| meat_sub_g       |                  |                   |                    |                   |                    | 0.00              |
| citrus_g         |                  |                   |                    |                   |                    | 0.00              |
| fruit_dried_g    |                  |                   |                    |                   |                    | 0.00              |
| fruit_other_g    |                  |                   |                    |                   |                    | 0.00              |
| fruit_juice_g    |                  |                   |                    |                   |                    | 0.00              |
| fruit_baby_g     |                  |                   |                    |                   |                    | 0.00              |
| potatoes_g       |                  |                   |                    |                   |                    | 0.00              |
| veg_darkgreen_g  |                  |                   |                    |                   |                    | 0.02              |
| veg_deepyellow_g |                  |                   |                    |                   |                    | 0.00              |
| tomatoes_g       |                  |                   |                    |                   |                    | 0.06              |
| veg_other_g      |                  |                   |                    |                   |                    | 0.12              |
| veg_baby_g       |                  |                   |                    |                   |                    | 0.00              |
| veg_meat_g       |                  |                   |                    |                   |                    | 0.06              |
| veg_mixture_g    |                  |                   |                    |                   |                    | 0.00              |
| fats_g           |                  |                   |                    |                   |                    | 0.15              |
| oils_g           |                  |                   |                    |                   |                    | 0.24              |
| salad_dressing_g |                  |                   |                    |                   |                    | 0.06              |
| sweets_g         |                  |                   |                    |                   |                    | 0.07              |
| bev_nonalc       |                  |                   |                    |                   |                    | 0.00              |
| bev_alcohol_g    |                  |                   |                    |                   |                    | 0.00              |
| water_g          |                  |                   |                    |                   |                    | 0.00              |
| kcal             |                  |                   |                    |                   |                    | 0.29              |
| protein_g        |                  |                   |                    |                   |                    | 0.44              |
| carb_g           |                  |                   |                    |                   |                    | 0.55              |
| fiber_g          |                  |                   |                    |                   |                    | 1.69              |
| fat_g            |                  |                   |                    |                   |                    | 0.00              |
| fat_sat_g        |                  |                   |                    |                   |                    | 0.21              |
| fat_mono_g       |                  |                   |                    |                   |                    | 0.17              |



1  
2  
3  
4  
5  
6  
7  
8  
9  
10  
11  
12  
13  
14  
15  
16  
17  
18  
19  
20  
21  
22  
23  
24  
25  
26  
27  
28  
29  
30  
31  
32  
33  
34  
35  
36  
37  
38  
39  
40  
41  
42  
43  
44  
45  
46  
47  
48  
49  
50  
51  
52  
53  
54  
55  
56  
57  
58  
59  
60

|                        | Model 1<br>(ACC) | Model 2<br>(+HEI) | Model 3<br>(+AHEI) | Model 4<br>(+MDS) | Model 5<br>(+DASH) | Model 6<br>(+All) |
|------------------------|------------------|-------------------|--------------------|-------------------|--------------------|-------------------|
| fat_poly_g             |                  |                   |                    |                   |                    | 0.00              |
| cholesterol<br>_mg     |                  |                   |                    |                   |                    | 0.00              |
| vite_mg                |                  |                   |                    |                   |                    | 0.00              |
| vita_mg                |                  |                   |                    |                   |                    | 0.18              |
| betacar_o_m<br>cg      |                  |                   |                    |                   |                    | 0.19              |
| vitb1_mg               |                  |                   |                    |                   |                    | 0.05              |
| vitb2_mg               |                  |                   |                    |                   |                    | 0.02              |
| niacin_mg              |                  |                   |                    |                   |                    | 0.02              |
| vitb6_mg               |                  |                   |                    |                   |                    | 0.32              |
| folate_mcg             |                  |                   |                    |                   |                    | 0.11              |
| vitb12_mcg             |                  |                   |                    |                   |                    | 0.00              |
| vitc_mg                |                  |                   |                    |                   |                    | 0.00              |
| calcium_m<br>g         |                  |                   |                    |                   |                    | 0.23              |
| phosphoru<br>s_mg      |                  |                   |                    |                   |                    | 0.13              |
| magnesium<br>_mg       |                  |                   |                    |                   |                    | 0.47              |
| iron_mg                |                  |                   |                    |                   |                    | 0.11              |
| zinc_mg                |                  |                   |                    |                   |                    | 0.08              |
| copper_mg              |                  |                   |                    |                   |                    | 0.29              |
| sodium_mg              |                  |                   |                    |                   |                    | 0.02              |
| potassium_<br>mg       |                  |                   |                    |                   |                    | 1.82              |
| selenium_<br>mcg       |                  |                   |                    |                   |                    | 0.09              |
| caffeine_m<br>g        |                  |                   |                    |                   |                    | 0.00              |
| theobromin<br>e_mg     |                  |                   |                    |                   |                    | 0.00              |
| alcohol_gm             |                  |                   |                    |                   |                    | 0.02              |
| sfa_40_gm              |                  |                   |                    |                   |                    | 0.10              |
| sfa_60_gm              |                  |                   |                    |                   |                    | 0.00              |
| sfa_80_gm              |                  |                   |                    |                   |                    | 0.07              |
| sfa_100_g<br>m         |                  |                   |                    |                   |                    | 0.00              |
| sfa_120_g<br>m         |                  |                   |                    |                   |                    | 0.14              |
| sfa_140_g<br>m         |                  |                   |                    |                   |                    | 0.02              |
| sfa_160_g<br>m         |                  |                   |                    |                   |                    | 0.00              |
| sfa_180_g<br>m         |                  |                   |                    |                   |                    | 0.30              |
| mfa_161h_<br>gm        |                  |                   |                    |                   |                    | 0.17              |
| mfa_161o_<br>gm        |                  |                   |                    |                   |                    | 0.35              |
| mfa_201_g<br>m         |                  |                   |                    |                   |                    | 0.00              |
| mfa_221_g<br>m         |                  |                   |                    |                   |                    | 0.00              |
| pfa_182_g<br>m         |                  |                   |                    |                   |                    | 0.00              |
| pfa_183_g<br>m         |                  |                   |                    |                   |                    | 0.07              |
| pfa_184_g<br>m         |                  |                   |                    |                   |                    | 0.02              |
| pfa_204_g<br>m         |                  |                   |                    |                   |                    | 0.00              |
| pfa_205_g<br>m         |                  |                   |                    |                   |                    | 0.00              |
| pfa_225_g<br>m         |                  |                   |                    |                   |                    | 0.00              |
| pfa_226_g<br>m         |                  |                   |                    |                   |                    | 0.04              |
| water_yest<br>erday_gm |                  |                   |                    |                   |                    | 0.00              |

**Supplementary Table I: TRIPOD checklist**

| <b>Title and abstract</b>  |     |                                                                                                                                                                                                       | <b>Page number</b>  |
|----------------------------|-----|-------------------------------------------------------------------------------------------------------------------------------------------------------------------------------------------------------|---------------------|
| Title                      | 1   | Identify the study as developing and/or validating a multivariable prediction model, the target population, and the outcome to be predicted                                                           | 1                   |
| Abstract                   | 2   | Provide a summary of objectives, study design, setting, participants, sample size, predictors, outcome, statistical analysis, results, and conclusions                                                | 2                   |
| <b>Introduction</b>        |     |                                                                                                                                                                                                       |                     |
| Background and objectives  | 3a  | Explain the medical context (including diagnostic or prognostic) and rationale for developing or validating the multivariable prediction model, including references to existing models               | 4-5                 |
|                            | 3b  | Specify the objectives, including whether the study describes the development or validation of the model, or both                                                                                     | 5                   |
| <b>Methods</b>             |     |                                                                                                                                                                                                       |                     |
| Source of data             | 4a  | Describe the study design or sources of data (e.g., randomized trial, cohort, or registry data), separately for the development and validation data sets, if applicable                               | 6                   |
|                            | 4b  | Specify the key study dates, including start of accrual; end of accrual; and, if applicable, end of follow-up                                                                                         | 6                   |
| Participants               | 5a  | Specify key elements of the study setting (e.g., primary care, secondary care, general population) including number and location of centers                                                           | 6                   |
|                            | 5b  | Describe eligibility criteria for participants                                                                                                                                                        | 6                   |
|                            | 5c  | Give details of treatments received, if relevant                                                                                                                                                      | N/A                 |
| Outcome                    | 6a  | Clearly define the outcome that is predicted by the prediction model, including how and when assessed                                                                                                 | 6                   |
|                            | 6b  | Report any actions to blind assessment of the outcome to be predicted                                                                                                                                 | 6                   |
| Predictors                 | 7a  | Clearly define all predictors used in developing the multivariable prediction model, including how and when they were measured                                                                        | 6-7, Supp Table A   |
|                            | 7b  | Report any actions to blind assessment of predictors for the outcome and other predictors                                                                                                             | 6                   |
| Sample size                | 8   | Explain how the study size was arrived at                                                                                                                                                             | 7                   |
| Missing data               | 9   | Describe how missing data were handled (e.g., complete-case analysis, single imputation, multiple imputation) with details of any imputation method                                                   | 7                   |
| Statistical analysis       | 10a | Describe how predictors were handled in the analysis (D)                                                                                                                                              | 6-7                 |
|                            | 10b | Specify type of model, all model-building procedures (including any predictor selection), and method for internal validation (D)                                                                      | 7-8                 |
|                            | 10c | For validation, describe how predictions were calculated (V)                                                                                                                                          | 7                   |
|                            | 10d | Specify all measures used to assess model performance and, if relevant, to compare multiple models                                                                                                    | 8-9                 |
|                            | 10e | Describe any model updating (e.g., recalibration) arising from the validation, if done (V)                                                                                                            | 10                  |
| Risk groups                | 11  | Provide details on how risk groups were created, if done                                                                                                                                              | N/A                 |
| Development vs. validation | 12  | For validation, identify any differences from the development data in setting, eligibility criteria, outcome, and predictors (V)                                                                      | N/A                 |
| <b>Results</b>             |     |                                                                                                                                                                                                       |                     |
| Participants               | 13a | Describe the flow of participants through the study, including the number of participants with and without the outcome and, if applicable, a summary of the follow-up time. A diagram may be helpful. | 10                  |
|                            | 13b | Describe the characteristics of the participants (basic demographics, clinical features, available predictors), including number of participants with missing data for predictors and outcome         | 10, Table 1         |
|                            | 13c | For validation, show a comparison with the development data of the distribution of important variables (demographics, predictors, and outcome) (V)                                                    | 10, Table 1         |
| Model development          | 14a | Specify the number of participants and outcome events in each analysis (D)                                                                                                                            | 10-11               |
|                            | 14b | If done, report the unadjusted association between each candidate predictor and outcome (D)                                                                                                           | 12-13, Supp Table G |
| Model specification        | 15a | Present the full prediction model to allow predictions for individuals (i.e., all regression coefficients, and model intercept or baseline survival at a given time point) (D)                        | 12-13, Supp Table G |
|                            | 15b | Explain how to use the prediction model (D)                                                                                                                                                           | 12-13               |
| Model performance          | 16  | Report performance measures (with CIs) for the prediction model                                                                                                                                       | 11-13               |
| Model updating             | 17  | If done, report the results from any model updating (i.e., model specification, model performance) (V)                                                                                                | N/A                 |
| <b>Discussion</b>          |     |                                                                                                                                                                                                       |                     |
| Limitations                | 18  | Discuss any limitations of the study (such as non-representative sample, few events per predictor, missing data)                                                                                      | 14                  |
| Interpretation             | 19a | For validation, discuss the results with reference to performance in the development data, and any other validation data (V)                                                                          | 14                  |
|                            | 19b | Give an overall interpretation of the results, considering objectives, limitations, results from similar studies, and other relevant evidence                                                         | 15                  |
| Implications               | 20  | Discuss the potential clinical use of the model and implications for future research                                                                                                                  | 15                  |
| <b>Other information</b>   |     |                                                                                                                                                                                                       |                     |
| Supplementary information  | 21  | Provide information about the availability of supplementary resources, such as study protocol, Web calculator, and data sets                                                                          | 25-37               |
| Funding                    | 22  | Give the source of funding and the role of the funders for the present study                                                                                                                          | 16                  |

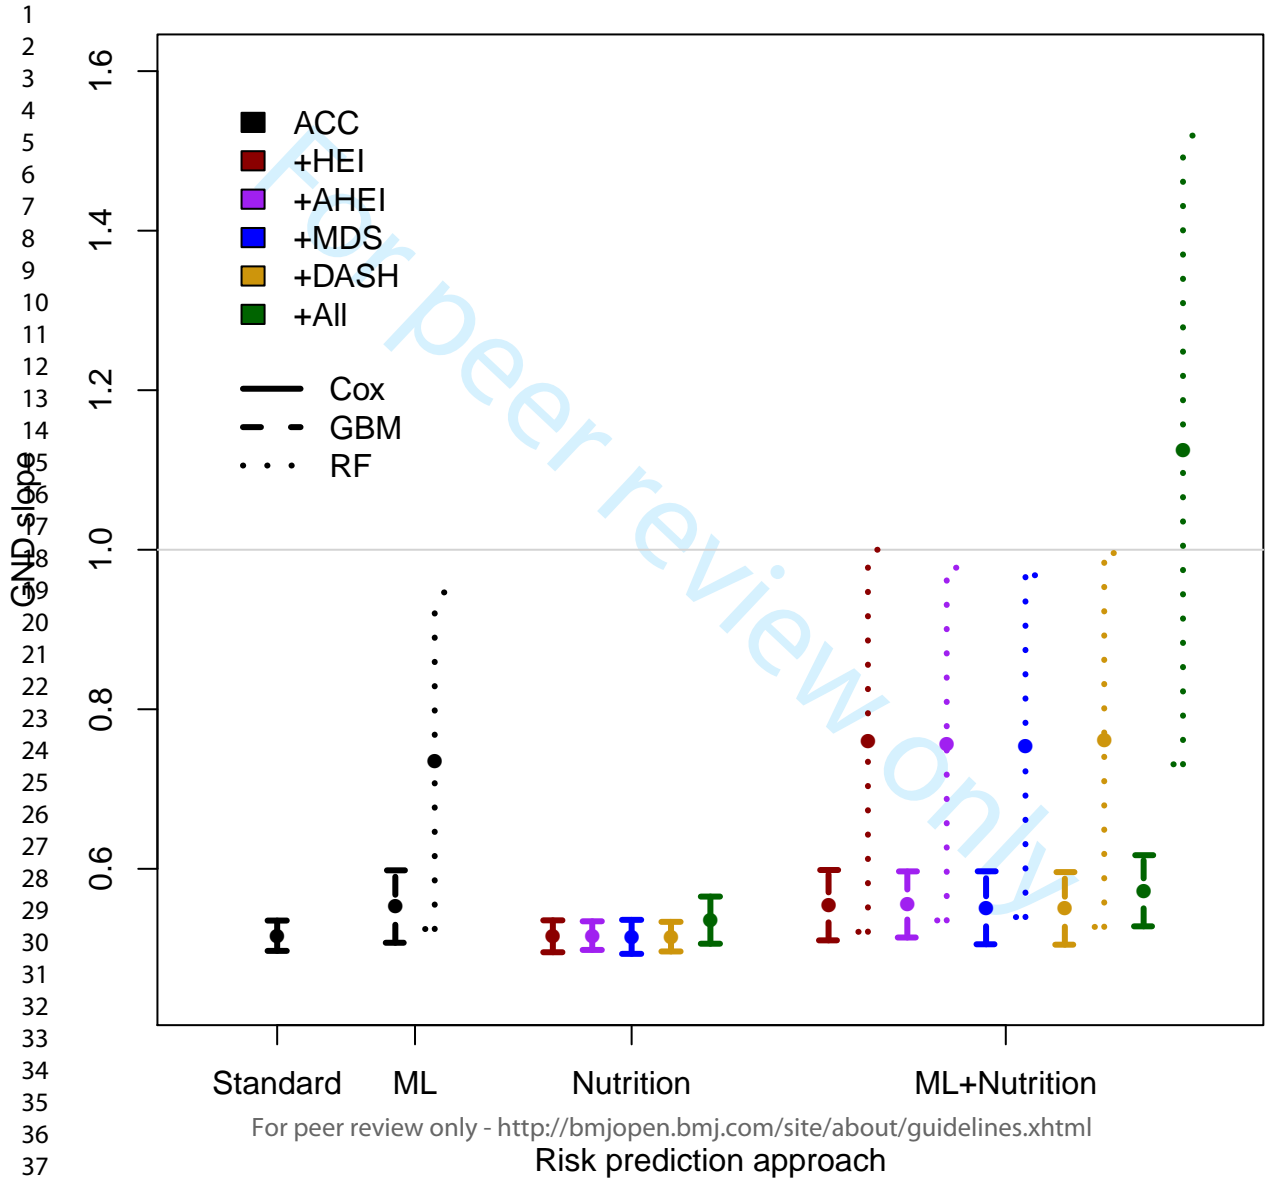

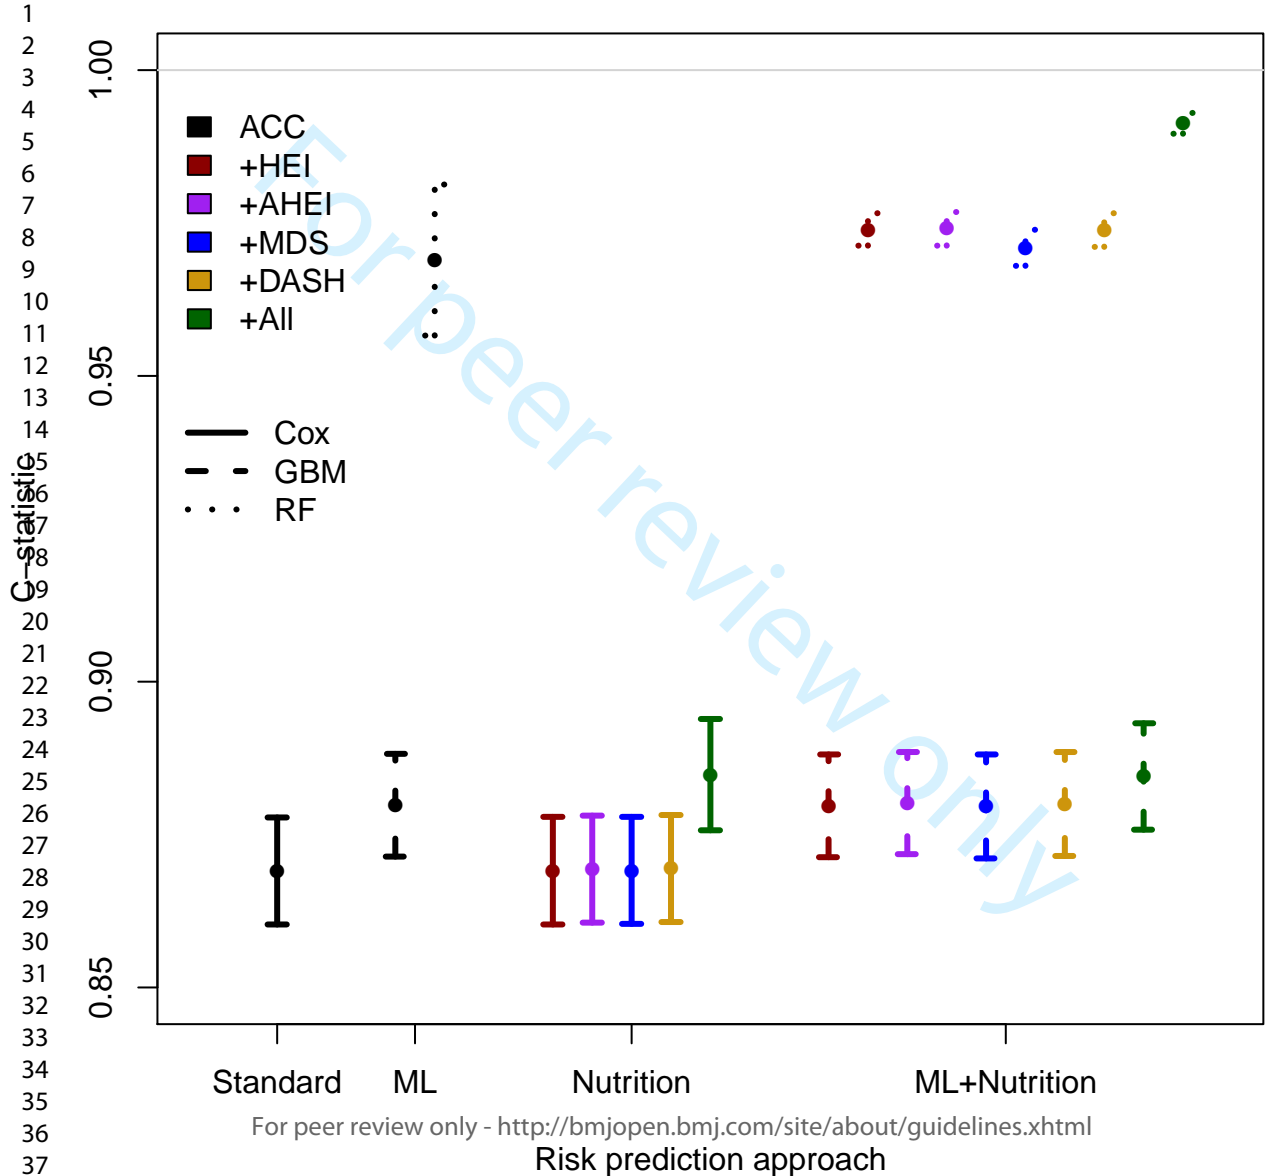

(a)

(b)

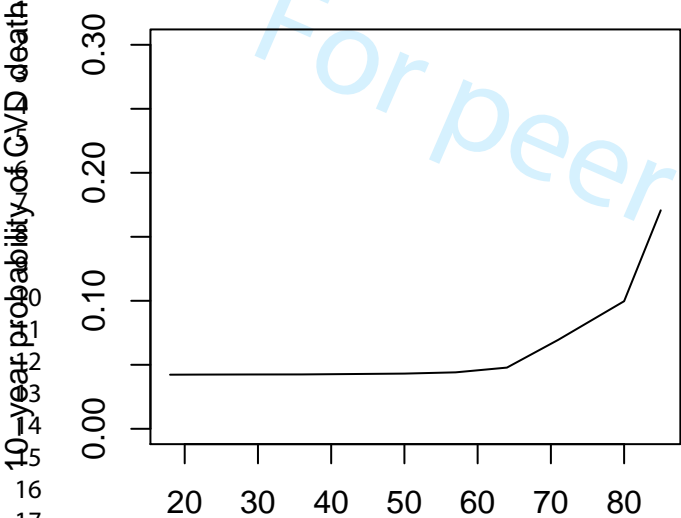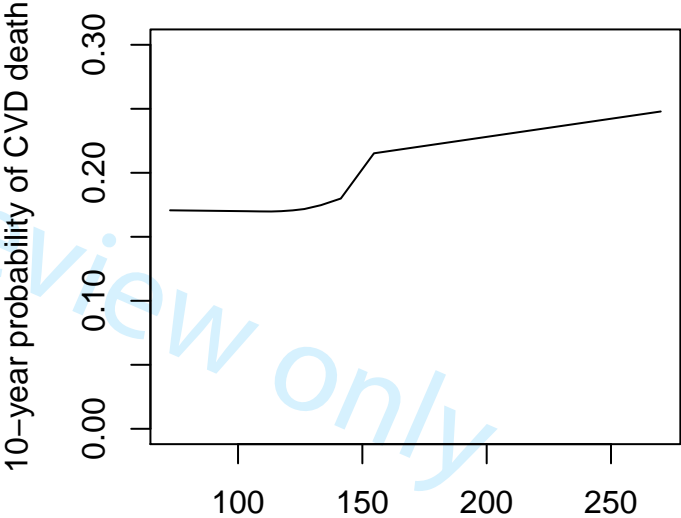

For peer review only - <http://bmjopen.bmj.com/site/about/guidelines.xhtml>  
Age (years)

Systolic blood pressure (mmHg)

For peer review only

15  
16  
17  
18  
19  
20

# BMJ Open

## Machine learning with sparse nutrition data to improve cardiovascular mortality risk prediction in the United States using nationally randomly sampled data

|                                 |                                                                                                                                       |
|---------------------------------|---------------------------------------------------------------------------------------------------------------------------------------|
| Journal:                        | <i>BMJ Open</i>                                                                                                                       |
| Manuscript ID                   | bmjopen-2019-032703.R1                                                                                                                |
| Article Type:                   | Original research                                                                                                                     |
| Date Submitted by the Author:   | 04-Oct-2019                                                                                                                           |
| Complete List of Authors:       | Rigdon, Joseph ; Wake Forest School of Medicine, Department of Biostatistics and Data Science<br>Basu, Sanjay; Harvard Medical School |
| <b>Primary Subject Heading</b>: | Cardiovascular medicine                                                                                                               |
| Secondary Subject Heading:      | Research methods                                                                                                                      |
| Keywords:                       | Cardiovascular disease, machine learning, Nutrition < TROPICAL MEDICINE, risk prediction                                              |
|                                 |                                                                                                                                       |

SCHOLARONE™  
Manuscripts

1  
2  
3 **Machine learning with sparse nutrition data to improve cardiovascular mortality**  
4 **risk prediction in the United States using nationally randomly sampled data**  
5  
6  
7  
8  
9

10  
11  
12  
13 Joseph Rigdon, PhD\*

14  
15 Department of Biostatistics and Data Science, Wake Forest School of Medicine,  
16  
17  
18 525@Vine #4403  
19  
20 Winston-Salem, North Carolina 27157  
21  
22 [jrigdon@wakehealth.edu](mailto:jrigdon@wakehealth.edu)  
23  
24  
25  
26  
27

28 Sanjay Basu, MD, PhD

29  
30 Center for Primary Care, Harvard Medical School  
31  
32 Research and Analytics, Collective Health  
33  
34 School of Public Health, Imperial College London  
35  
36 635 Huntington Avenue, 2<sup>nd</sup> floor  
37  
38 Boston, MA 02115  
39  
40 [sanjay\\_basu@hms.harvard.edu](mailto:sanjay_basu@hms.harvard.edu)  
41  
42  
43  
44  
45  
46  
47  
48  
49  
50  
51  
52  
53  
54  
55  
56  
57  
58  
59  
60

\*Denotes corresponding author

## Abstract

**Objectives:** We aimed to test whether or not adding (i) nutrition predictor variables and/or (ii) using machine learning models improves cardiovascular death prediction versus standard Cox models without nutrition predictor variables

**Design:** Retrospective study

**Setting:** Six waves of National Health and Nutrition Examination Survey (NHANES) data collected from 1999-2011 linked to the National Death Index (NDI)

**Participants:** 29,390 participants were included in the training set for model derivation and 12,600 were included in the test set for model evaluation. Our study sample was approximately 20% black race and 25% Hispanic ethnicity.

**Primary and Secondary Outcome Measures:** Time from NHANES interview until the minimum of time of cardiovascular death or censoring

**Results:** A standard risk model excluding nutrition data overestimated risk nearly two-fold [calibration slope of predicted versus true risk: 0.53 (95% CI: 0.50, 0.55)] with moderate discrimination [C-statistic: 0.87 (0.86, 0.89)]. Nutrition data alone failed to improve performance while machine learning alone improved calibration to 1.18 (0.92, 1.44) and discrimination to 0.91 (0.90, 0.92). Both together substantially improved calibration [slope: 1.01 (0.76, 1.27)] and discrimination [C-statistic: 0.93 (0.92, 0.94)].

**Conclusions:** Our results indicate that the inclusion of nutrition data with available machine learning algorithms can substantially improve cardiovascular risk prediction.

**Keywords:** Cardiovascular disease, machine learning, nutrition, risk prediction

**Word Count:** 3,475



### Strengths and limitations of this study

- Nationally representative data with a comprehensive evaluation of nutrition, direct laboratory assessment of biomarkers, and direct examination of blood pressure
- Comprehensive follow-up with mortality adjudication by cause of death
- Limitations include the need to impute missing data, a short follow-up duration among individuals collected in the later waves of NHANES, and the lack of information about cardiovascular disease (CVD) events in addition to CVD mortality.

### Introduction

Nutrition is thought to be a major contributor to cardiovascular disease mortality risk<sup>1-4</sup>, but as yet is not explicitly incorporated into cardiovascular risk models that are used to guide clinical prescribing of statins and other preventive medications<sup>5-9</sup>. Nutrition is both imperfectly measured, typically through 24-hour dietary recalls, and nutrition data are sparse and multi-variable, with numerous metrics from individual kilocalorie intakes across a wide range of macro and micronutrients<sup>10,11</sup>, making it difficult to determine how an overall nutritional profile might be incorporated into clinical practice. Several groups have offered composite nutrition quality scores (e.g., the Healthy Eating Index and alternatives)<sup>12-14</sup>, which correlate to some degree with cardiovascular mortality<sup>15-22</sup> but have not yet been incorporated into common risk equations that use more traditional risk markers (e.g., systolic blood pressure)<sup>5</sup>. Optimizing cardiovascular disease risk prediction is important in clinical practice, because many modern clinical guidelines recommend that physicians prescribe therapies (such as statins, aspirin, and intensive blood pressure treatment) based in part on estimates of overall cardiovascular disease

1  
2  
3 risk, not simply based on the levels of a single biomarker such as cholesterol or blood  
4 pressure levels, which fail to fully capture the influence of nutrition on risk<sup>23–26</sup>.  
5  
6  
7

8 With modern machine learning methods, it may be possible to avoid the problems of  
9 composite indices, such as reducing a large amount of sparse data to a rough composite  
10 that does not explain substantial variation in observed risk<sup>27</sup>. Machine learning  
11 approaches are particularly adept at capturing a complex array of large data represented  
12 by the sparse matrices of nutrition variables, and incorporating interactions among the  
13 data variables (such as between different types of nutrients, e.g., different fats, different  
14 carbohydrates, etc.), and identify nonlinear relationships between risk factors and  
15 outcomes (e.g., increasing carbohydrate to a very high level from a medium level may  
16 differ in impact than increasing from low to medium) that traditional regression models  
17 may not fully capture<sup>28–31</sup>. Additionally, with high-quality, more rapid 24-hour dietary  
18 recall techniques that can more comprehensively assess a person's dietary behaviors  
19 and link them to large nutritional databases, it is now possible to assess nutritional  
20 profiles in detail in the clinician's office or clinic waiting room<sup>32–35</sup>. It remains unclear,  
21 however, whether nutritional information from a 24-hour recall can add meaningful value  
22 to cardiovascular mortality risk prediction beyond biomarker values—such as lipid  
23 profile, blood pressure, and diabetes status—and whether using a machine learning  
24 approach can advance the predictive power of dietary recalls for cardiovascular risk  
25 assessment beyond composite indices already available.  
26  
27  
28  
29  
30  
31  
32  
33  
34  
35  
36  
37  
38  
39  
40  
41  
42  
43  
44  
45  
46

47 Here, we use a 2-by-2 factorial experimental design to test two hypotheses using  
48 observational data: (i) that the data from a single 24-hour dietary recall can add  
49 substantial predictive value to cardiovascular mortality risk estimation beyond that  
50 afforded by standard biomarkers already included in traditional cardiovascular risk  
51 calculators; and (ii) that machine learning approaches to directly incorporate sparse  
52  
53  
54  
55  
56  
57  
58  
59  
60

1  
2  
3 matrices of nutrition data into risk estimates can be superior to standard regression  
4  
5 models or the composite nutritional indices constructed through linear modeling methods  
6  
7 in the past.  
8  
9

## 10 11 12 13 14 **Methods**

15  
16  
17 We conducted a 2-by-2 factorial experiment in which we compared the calibration and  
18  
19 discrimination of cardiovascular disease mortality risk prediction models with and without  
20  
21 data from a 24-hour dietary recall, and with and without a machine learning approach.  
22  
23

### 24 *Data Source*

25  
26 Six waves of cross-sectional data from the National Health and Nutrition Examination  
27  
28 Survey (NHANES, 1999-2000, 2001-2002, 2003-2004, 2005-2006, 2007-2008, and  
29  
30 2009-2010) were used to develop and validate the risk prediction models. The details of  
31  
32 the NHANES sampling scheme are described elsewhere<sup>36</sup>. Briefly, NHANES is a survey  
33  
34 including laboratory biomarkers and clinical examination, collected in two-year waves  
35  
36 among children and adults, sampled to represent the non-institutionalized civilian U.S.  
37  
38 population. Each observation within each wave was linked to the National Death Index  
39  
40 (NDI, through 2011) by the Centers for Disease Control. The NDI provided data on the  
41  
42 time of CVD death or censoring of follow-up, and additionally a variable attributing death  
43  
44 to one of nine-cause specific categories (heart disease, cancer, chronic lower respiratory  
45  
46 disease, cerebrovascular diseases, diabetes, pneumonia and influenza, Alzheimer's  
47  
48 disease, kidney disease, and unintentional injuries).  
49  
50  
51  
52  
53  
54  
55  
56  
57  
58  
59  
60

1  
2  
3 The primary statistical outcome was defined as time from NHANES interview to the  
4 minimum of time of censoring or time of death from heart disease or cerebrovascular  
5 diseases, henceforth CVD mortality. Death from any other cause was treated as  
6 censored. Inclusion criteria were age 20-79 years old at time of interview with no prior  
7 CVD history. No actions were taken to blind assessment of predictors for the outcome  
8 and other predictors. No actions were taken to blind assessment of the outcome.  
9  
10  
11  
12  
13  
14  
15  
16  
17

18 All potential predictors in the models were collected at time of NHANES interview to  
19 mimic a hypothetical scenario where a medical provider may want to conduct an in-clinic  
20 24-hour dietary recall to improve prediction of CVD mortality. Demographic variables  
21 included age, sex, and race (Black race, Hispanic ethnicity), and currently-employed  
22 cardiovascular disease risk factors of total cholesterol (mg/dL), high-density lipoprotein  
23 cholesterol (HDL; mg/dL), systolic blood pressure (mmHg), blood pressure treatment  
24 status (yes/no), diabetes status (yes/no), and current smoking status (yes/no)<sup>5</sup>. Nutrition  
25 variables included daily standardized intake of micronutrients (e.g., sodium, selenium)  
26 and macronutrients (e.g., fat, carbohydrates, protein) collected during a single 24-hour  
27 dietary recall following the NHANES interview (Supplementary Table A).  
28  
29  
30  
31  
32  
33  
34  
35  
36  
37  
38  
39  
40

#### 41 *Patient and Public Involvement*

42  
43 No patient involved.  
44  
45  
46

#### 47 *Model Development*

48  
49 Random samples of 70% of each NHANES wave were pooled to form the training  
50 sample from which the models were derived, with the remaining 30% prospectively held  
51 out to form the test set to assess performance of each model without refitting or  
52 recalibration. To train the models in the presence of missing data, multiple imputation via  
53  
54  
55  
56  
57  
58  
59  
60

1  
2  
3 chained equations<sup>37,38</sup> was employed to fill in missing values (Supplementary Table B)  
4  
5 so that one complete data set was available.  
6  
7

8  
9 In one arm of the 2-by-2 design, we tested whether or not switching from the standard  
10  
11 Cox proportional hazards model to a machine learning algorithm could improve  
12  
13 calibration and discrimination. The machine learning algorithms tested were those  
14  
15 commonly used for clinical event risk prediction for censored time-to-event data: survival  
16  
17 gradient boosted machines (GBMs)<sup>39</sup> and survival random forests (RFs)<sup>40</sup>. Both of these  
18  
19 machine learning approaches construct decision trees from data. In a typical decision  
20  
21 tree, each branch of the tree divides the sampled study population into increasingly-  
22  
23 smaller subgroups that differ in their probability of the outcome. A good decision tree will  
24  
25 separate the sampled population into groups that have low within-group variability and  
26  
27 high between-group variability in the probability of the outcome. GBMs average many  
28  
29 trees where errors made by the first tree contribute to learning of a less erroneous tree in  
30  
31 the next iteration (a “boosting” strategy)<sup>41,42</sup>. RFs also build numerous decision trees, but  
32  
33 average a forest composed of many trees, where each tree is independently fitted (a  
34  
35 “bagging” strategy) with a random subset of covariates selected to be eligible to define  
36  
37 the branches<sup>42–45</sup>. RFs use inverse probability of censoring weights to address  
38  
39 censoring.  
40  
41  
42  
43  
44

45 In the second arm of the 2-by-2 design, we tested whether or not adding nutrition  
46  
47 variables, including all micro and macronutrients assessed in the NHANES dietary recall,  
48  
49 to the standard demographic and biomarker variables could improve prediction. We  
50  
51 additional compare incorporating all nutrition data versus using common existing  
52  
53 composite nutrition indices: the Healthy Eating Index (HEI)<sup>46</sup>, Alternate Healthy Eating  
54  
55  
56  
57  
58  
59  
60

1  
2  
3 Index (AHEI)<sup>47</sup>, Mediterranean Diet Score (MDS)<sup>48</sup>, and the Dietary Approaches to Stop  
4 Hypertension diet score (DASH)<sup>49</sup>.  
5  
6  
7  
8

9  
10 In total, our 2-by-2 design contained 18 models in four quadrants. The no machine  
11 learning, no nutrition (standard model) quadrant included only one model: a Cox  
12 regression model with demographics and biomarker variables. The machine learning, no  
13 nutrition quadrant included two models: a gradient boosted machine and a random  
14 forest, both using only demographics and biomarker variables. The no machine  
15 learning, nutrition quadrant included five models: a Cox regression including  
16 demographics, biomarkers, and either HEI, AHEI, MDS, DASH, or all micro and  
17 macronutrients from NHANES. Finally, the machine learning, nutrition quadrant included  
18 10 total models: gradient boosted machines or random forests including demographics,  
19 biomarkers, and either HEI, AHEI, MDS, DASH, or all micro and macronutrients from  
20 NHANES.  
21  
22  
23  
24  
25  
26  
27  
28  
29  
30  
31  
32  
33  
34

35 Cox regression models, GBM, and RF were fit to the 70% training data. GBMs were  
36 tuned via manual grid search over number of trees equal to 100, 300, or 500 and tree  
37 depth equal to 1, 5 or 10, with learning rate set to 0.1<sup>50</sup>. RFs based on conditional  
38 inference trees<sup>51,52</sup> were tuned via manual grid search over number of trees equal to  
39 100, 300, or 500 and number of input variables randomly sampled at each node equal to  
40 1, 5, or 10. The best performing GBM and RF models were those that minimized in the  
41 30% held-out test set the sum of (i) the squared error between the calibration metric  
42 (described below) and the ideal target of 1 and (ii) the squared error between the  
43 discrimination metric (described below) and the ideal target of 1.  
44  
45  
46  
47  
48  
49  
50  
51  
52  
53  
54  
55

### 56 *Outcome metrics*

57  
58  
59  
60

1  
2  
3 Model performance was assessed in terms of calibration (using the Greenwood-Nam-  
4 D'Agostino [GND] test) and discrimination (using the C-statistic). In the GND test, model  
5 predicted probability of 10-year CVD mortality risk was compared to observed rates of  
6 death from CVD within 10 years after the NHANES interview by decile of predicted risk.  
7  
8 A slope and intercept line were then drawn using these values across deciles of  
9  
10 predicted risk, such that a calibration slope of 1 reflects perfect calibration (a perfect 45-  
11 degree line between predicted and observed risk).  
12  
13  
14  
15  
16  
17  
18  
19

20 Model discrimination was assessed using the C-statistic (area under receiver operating  
21 characteristic [ROC] curve). Each point on the ROC curve was defined by the sensitivity  
22 (x-axis) and 1-specificity (y-axis) for a given cutpoint. The calculation of sensitivity and  
23 specificity followed from model predicted risk (above/below cutpoint) versus gold  
24 standard of outcome (whether or not CVD mortality happened within 10 years after  
25 NHANES interview). Confidence intervals for C-statistics were calculated using  
26 DeLong's test<sup>53</sup> as implemented in the R package 'pROC'<sup>54</sup>.  
27  
28  
29  
30  
31  
32  
33  
34  
35  
36

37 Sensitivity analyses included (i) adding education and poverty to the best performing  
38 model and (ii) applying the best performing model to the component outcomes CVD  
39 mortality, heart disease and cerebrovascular diseases, separately. No model updating  
40 was done in this study, and no risk groups were created. There were no differences in  
41 setting, eligibility criteria, outcome, or predictors between the training (development) set  
42 and the test (validation) set. There was no need for participant consent or Ethical Review  
43 Board approval as the data are publicly available. All statistical analyses were carried  
44 out in Stata 15 software<sup>55</sup> and R version 3.6.1<sup>56</sup>.  
45  
46  
47  
48  
49  
50  
51  
52  
53  
54  
55  
56  
57  
58  
59  
60

1  
2  
3 This manuscript was written in accordance with the Transparent Reporting of a  
4 Multivariable Prediction Model for Individual Prognosis or Diagnosis (TRIPOD)  
5 recommendations<sup>57</sup>, summarized in Supplementary Table C.  
6  
7  
8  
9

### 10 11 *Data Availability Statement*

12  
13 Statistical code used for data scraping (from NHANES and NDI websites, as specified in  
14 comments in the code), training and test data sets, data management, model fitting, and  
15 table and figure creation are available in the following public, open access repository:  
16  
17  
18 [https://github.com/joerigdon/CVD\\_Prediction](https://github.com/joerigdon/CVD_Prediction).  
19  
20  
21  
22  
23  
24  
25

## 26 **Results**

### 27 28 29 30 *Descriptive statistics on the study sample*

31  
32 Distributions of demographics, covariates and outcome rates were nearly equivalent in  
33 training and test sets (Table 1). Of the n=29390 individuals in the training set,  
34 1179/29390 (4.0%) experienced CVD mortality within the follow-up period; of the  
35 n=12600 in the test set, 507/12600 (4.0%) experienced CVD mortality. The median  
36 follow-up time was 79 months in both training and test sets, with a mean age of 50  
37 years, and 47% of the population being male, 20% Black, 26% Hispanic, 16% with  
38 diabetes, and 19% actively smoking tobacco. Composite nutrition indices were identical  
39 to within rounding error between the train and test datasets, with a mean HEI score of 47  
40 (out of 100<sup>46</sup>), AHEI score of 47 (out of 110<sup>47</sup>), MDS score of 5 (out of 10<sup>48</sup>), and DASH  
41 score of 47 (out of 80<sup>49</sup>); higher scores indicate better adherence to the recommended  
42 dietary guidelines for all four of the composite scores.  
43  
44  
45  
46  
47  
48  
49  
50  
51  
52  
53  
54  
55  
56  
57  
58  
59  
60



1  
2  
3 Compared to individuals without CVD mortality, individuals experiencing CVD mortality  
4 were older (74.3 vs. 49.0 years old), more likely to be male (55.0% vs. 46.9%), had  
5 higher systolic blood pressure (142.9 vs. 124.8 mmHg), were more likely to take blood  
6 pressure medications (74.2% vs. 30.8%), and were more likely to have diabetes (33.3%  
7 vs. 15.5%; Table 2). Regarding nutrition variables, those experiencing CVD mortality  
8 counter-intuitively had a higher HEI score (51.0 vs. 46.9), a higher AHEI score (48.0 vs.  
9 47.1), and a higher DASH score (48.1 vs. 47.4; Table 2), and comparable MDS scores  
10 (5.1 vs. 5.1).  
11  
12  
13  
14  
15  
16  
17  
18  
19  
20  
21

### 22 *Model calibration performance*

23  
24 As expected, model calibration values were better in the training (Supplementary Figure  
25 A, Supplementary Tables D, E, F, G, H, I) versus the held-out test set (Figure 1,  
26 Supplementary Tables J, K, L, M, N, O). Using the standard approach to CVD risk  
27 prediction modeling<sup>5</sup>, a Cox proportional hazards model with variables of age, sex, Black  
28 race, and Hispanic ethnicity, total cholesterol, HDL cholesterol, systolic blood pressure,  
29 blood pressure medication, diabetes, and tobacco use, yielded a GND calibration slope  
30 of 0.53 (95% CI: 0.50, 0.55), reflecting profound risk over-estimation consistent with prior  
31 estimates<sup>58,59</sup>. Adding HEI, AHEI, MDS, or DASH score to the model did not change the  
32 calibration slope of 0.53, however the addition of the raw (not composite) 24-hour recall  
33 data decreased the slope to 0.46 (0.43, 0.50), reflecting a worsening of over-estimation  
34 of risk (Figure 1, Supplementary Tables J, K, L, M, N, O).  
35  
36  
37  
38  
39  
40  
41  
42  
43  
44  
45  
46  
47  
48  
49

50 When using a machine learning GBM approach instead of a Cox proportional hazards  
51 model, but still excluding nutrition data, model calibration improved to 0.56 (0.51, 0.61),  
52 and when using random forest in place of Cox, the calibration improved further to 1.18  
53 (0.92, 1.44). Adding nutrition variables improved the machine learning models'  
54  
55  
56  
57  
58  
59  
60

1  
2  
3 calibration when raw 24-hour recall data were used, but not when composite dietary  
4 indices were used. Adding HEI, AHEI, MDS, or DASH slightly improved calibration slope  
5 to 0.59 for the GBM models and improved calibration slope for the random forest models  
6 from 1.18 to 1.13. The GBM model had the best calibration when using all 24-hour recall  
7 data, producing a calibration slope of 0.83 (0.77, 0.89). The random forest model with  
8 raw 24-hour nutrition data was the closest to the ideal value of 1, with a calibration slope  
9 of 1.01 (0.76, 1.27) (Figure 1, Supplementary Table O).

### 20 *Model discrimination performance*

21 Model discrimination values were better in the training (Supplementary Figure B,  
22 Supplementary Tables D, E, F, G, H, I) versus the held-out test set (Figure 2,  
23 Supplementary Tables J, K, L, M, N, O). The exclusion or inclusion of nutrition data did  
24 not affect discrimination of the standard Cox risk models. The Cox model with the above-  
25 mentioned non-nutrition data had a C-statistic of 0.88 (0.87, 0.89) in the test set. Adding  
26 HEI, AHEI, MDS, DASH, or all raw 24-hour recall data left the C-statistic unchanged at  
27 0.88 (Figure 2, Supplementary Tables J, K, L, M, N, O).

28  
29  
30  
31  
32  
33  
34  
35  
36  
37  
38  
39 Model discrimination also improved with use of machine learning. Using a GBM in place  
40 of a Cox model improved discrimination slightly, from C-statistics of 0.88 in Cox models  
41 to 0.90 (0.89, 0.91) for all GBM models without nutrition data and 0.91 (0.90, 0.92) for  
42 the random forest without nutrition data. The discrimination was not significantly different  
43 with the addition of composite nutritional indices, but did improve to 0.93 (0.92, 0.94)  
44 with the addition of raw nutrition data (Figure 2, Supplementary Table O).

### 53 *Important associations*

1  
2  
3 Cox model coefficients are detailed in Supplementary Table P and gradient boosted  
4 machine model relative influences are detailed in Supplementary Table Q. Notable  
5 associations with cardiovascular death included age (HR for 1-year increase in age of  
6 1.1 [1.09, 1.1], female sex (HR vs. males of 0.65 [0.57, 0.73]), Hispanic ethnicity (HR vs.  
7 non-Hispanics of 0.69 [0.58, 0.81]), systolic BP (HR for 1-unit increase of 1.0050  
8 [1.0024, 1.0075]), blood pressure medications (HR for each additional med of 1.19 [1.08,  
9 1.30]), type 2 diabetes (HR vs. non-diabetics of 1.46 [1.29, 1.65]), and tobacco use (HR  
10 vs. non-users 1.91 [1.61, 2.27]) (Supplementary Table P). No associations with  
11 cardiovascular death were found with HEI or AHEI. A one-unit increase of MDS slightly  
12 increased risk: 1.0481 (1.0004, 1.0980), and a one-unit increase in DASH score slightly  
13 reduced risk: 0.9870 (0.9806, 0.9935).  
14  
15  
16  
17  
18  
19  
20  
21  
22  
23  
24  
25  
26  
27

28 In the comprehensive evaluation of all 24-hour nutrition variables, protective  
29 associations were seen with fiber (HR 0.96 [0.95, 0.97] for 1-gram increase) and niacin  
30 (HR 0.98 [0.96, 0.99] for 1-milligram increase), and harmful association with saturated  
31 fat (HR 1.19 [1.07, 1.32] for 1-gram increase). Examining fat intake per one-gram  
32 increase more closely, SFA 16:0 intake was protective [0.85 (0.76, 0.94)], as was SFA  
33 18:0 [0.85 (0.75, 0.98)]. MFA 16:1 [1.06 (1.02, 1.10)], and MFA 20:1 [1.32 (1.03, 1.69)]  
34 slightly increased risk, as did PFA 18:2 [1.07 (1.04, 1.11)]. MFA 22:1 [0.34 (0.13, 0.90)]  
35 and PFA 18:3 [0.80 (0.68, 0.95)] reduced risk.  
36  
37  
38  
39  
40  
41  
42  
43  
44  
45  
46

47 Relative influences in a GBM display how much of a 0-100 importance total is accounted  
48 for by each variable in the model (Supplementary Table Q). Age consistently had  
49 relative influences of 20-30, with the exception of Model 3 with AHEI (relative influence  
50 6), and Model 4 with MDS (relative influence 3). SBP had a relative influence of 19-41 in  
51 all models except Model 6 with all nutrition variables (relative influence 3). HDL ranged  
52  
53  
54  
55  
56  
57  
58  
59  
60

1  
2  
3 from 10-37 with the exception of Model 4 with AHEI (3) and Model 6 with all nutrition  
4 variables (3). Total cholesterol ranged from 13-24 with the exception of Model 6 (2).  
5  
6 Tobacco use was unusually influential in Model 3 (46) while remaining below 4 in all  
7  
8 other models. HEI was important in Model 1 (14) and DASH in Model 5 (17), whereas  
9  
10 relative influences for AHEI and MDS failed to exceed 2. Of the 24-hour nutrition  
11  
12 variables, iron, legumes, sweets, and pastries had relative influences of 5 or greater.  
13  
14 Partial dependence plots for the random forest model with all nutrition variables reveal  
15  
16 an exponential increase in 10-year probability of CVD death starting at about age 65,  
17  
18 and a linear increase in risk for 10-year probability of CVD death after 120 mmHg  
19  
20 systolic blood pressure (Supplementary Figure C).  
21  
22  
23  
24  
25

### 26 *Sensitivity Analyses*

27  
28 Adding education and poverty to the best performing model did not substantially improve  
29  
30 calibration (1.0120 with vs. 1.0137 without), or discrimination (0.9336 with vs. 0.9320  
31  
32 without). Applying the best performing model separately to death from heart disease  
33  
34 yielded calibration slope 0.9670 (0.7525, 1.1814) and discrimination C-statistic 0.9256  
35  
36 (0.9120, 0.9391). Applying the best performing model separately to death from  
37  
38 cerebrovascular disease yielded calibration slope 0.7406 (0.5636, 0.9177) and  
39  
40 discrimination C-statistic 0.9157 (0.8898, 0.9416).  
41  
42  
43  
44  
45

### 46 **Discussion**

47  
48  
49 We examined whether or not improvements in CVD mortality prediction could be  
50  
51 achieved by including sparse nutrition data into models derived through machine  
52  
53 learning algorithms. We observed that the addition of nutrition variables to a standard  
54  
55 Cox proportional hazards model was not of substantial benefit alone, machine learning  
56  
57  
58  
59  
60

1  
2  
3 alone improved calibration and moderately improved discrimination, and when both  
4 nutrition data and machine learning were combined, we could substantially improve risk  
5 prediction beyond the inclusion of standard demographics and biomarkers alone.  
6  
7 Calibration particularly improved when both nutrition data and machine learning  
8 algorithms were used.  
9  
10  
11  
12  
13  
14  
15

16 Our findings are of clinical relevance as more rapid, automated or mobile device-based  
17 24-hour dietary recalls make it feasible to provide a nutrition profile for patients at or  
18 before visiting a doctor's office<sup>1,2</sup>, and as automated cardiovascular disease risk  
19 prediction models become an increasingly-important part of precision medicine  
20 guidelines that aim to improve the ability of medical practitioners to prescribe preventive  
21 cardiovascular treatments to patients with the highest risk<sup>6</sup>. As standard biomarkers fail  
22 to explain the full extent to which nutrition relates to cardiovascular mortality<sup>60,61</sup>,  
23 machine learning approaches that directly incorporate raw dietary data appear to have  
24 benefits over composite nutritional indices that may excessively reduce complexity in  
25 nutritional interactions and non-linear relationships that confer risk. Our study benefits  
26 from being conducted on a nationally representative sample of US adults, including a  
27 comprehensive evaluation of nutrition, direct laboratory assessment of biomarkers, direct  
28 examination of blood pressure, and comprehensive follow-up with mortality adjudication  
29 by cause of death.  
30  
31  
32  
33  
34  
35  
36  
37  
38  
39  
40  
41  
42  
43  
44  
45  
46

47 Nevertheless, our study has important limitations, including the need to impute missing  
48 data, a short follow-up duration among individuals collected in the later waves of  
49 NHANES, the lack of information about CVD events in addition to CVD mortality, and the  
50 need to assess feasibility of model implementation in practice. In the future, further  
51 research can assess whether the performance of rapid dietary recalls and associated  
52  
53  
54  
55  
56  
57  
58  
59  
60

1  
2  
3 cardiovascular risk estimation can be implemented in practice, whether the level of  
4  
5 improvements to calibration and discrimination observed in this assessment produce  
6  
7 clinically-meaningful changes in the level of prescribing of key preventive therapies for  
8  
9 patients, and whether the difficulties of interpreting machine learning models compared  
10  
11 to traditional Cox-type risk models poses challenges to the acceptability of these models  
12  
13 in clinical practice.  
14  
15

16  
17  
18 At present, our results indicate that the inclusion of nutrition data with available machine  
19  
20 learning algorithms can substantially improve cardiovascular risk prediction.  
21  
22

### 23 24 **Author Contributions**

25  
26 SB conceptualized the study and design and contributed to data preparation and  
27  
28 analysis. JR contributed to data preparation and analysis. Both authors contributed to  
29  
30 writing and critically reviewing the manuscript.  
31  
32

### 33 34 **Competing Interests statement**

35  
36 JR and SB have no competing interests to report.  
37  
38

### 39 40 **Acknowledgements**

41  
42 The authors acknowledge two anonymous reviewers at the Stanford Quantitative  
43  
44 Sciences Unit.  
45  
46

### 47 48 **Funding**

49  
50 This work was supported by the National Institute On Minority Health And Health  
51  
52 Disparities of the National Institutes of Health under Award Number DP2MD010478. The  
53  
54  
55  
56  
57  
58  
59  
60

1  
2  
3 content is solely the responsibility of the authors and does not necessarily represent the  
4  
5 official views of the National Institutes of Health.  
6  
7  
8

## 9 **References**

- 10  
11 1. Shivappa, N., Steck, S. E., Hussey, J. R., Ma, Y. & Hebert, J. R. Inflammatory  
12 potential of diet and all-cause, cardiovascular, and cancer mortality in National  
13 Health and Nutrition Examination Survey III Study. *Eur. J. Nutr.* **56**, 683–692 (2017).  
14  
15
- 16 2. Aune, D. *et al.* Fruit and vegetable intake and the risk of cardiovascular disease,  
17 total cancer and all-cause mortality—a systematic review and dose-response meta-  
18 analysis of prospective studies. *Int. J. Epidemiol.* **46**, 1029–1056 (2017).  
19  
20
- 21 3. Wang, D. D. *et al.* Association of Specific Dietary Fats With Total and Cause-  
22 Specific Mortality. *JAMA Intern. Med.* **176**, 1134–1145 (2016).  
23  
24
- 25 4. Langley - Evans, S. C. Nutrition in early life and the programming of adult disease: a  
26 review. *J. Hum. Nutr. Diet.* **28**, 1–14 (2015).  
27  
28
- 29 5. Goff David C. *et al.* 2013 ACC/AHA Guideline on the Assessment of Cardiovascular  
30 Risk. *Circulation* **129**, S49–S73 (2014).  
31  
32
- 33 6. Stone Neil J. *et al.* 2013 ACC/AHA Guideline on the Treatment of Blood Cholesterol  
34 to Reduce Atherosclerotic Cardiovascular Risk in Adults. *Circulation* **129**, S1–S45  
35 (2014).  
36  
37
- 38 7. Expert Panel on Detection, Evaluation, and Treatment of High Blood Cholesterol in  
39 Adults. Executive Summary of the Third Report of the National Cholesterol  
40 Education Program (NCEP) Expert Panel on Detection, Evaluation, and Treatment  
41 of High Blood Cholesterol in Adults (Adult Treatment Panel III). *JAMA J. Am. Med.*  
42 *Assoc.* **285**, 2486–2497 (2001).  
43  
44  
45  
46  
47  
48  
49  
50  
51  
52  
53  
54  
55  
56  
57  
58  
59  
60

- 1  
2  
3 8. Lloyd-Jones, D. M. *et al.* Prediction of Lifetime Risk for Cardiovascular Disease by  
4 Risk Factor Burden at 50 Years of Age. *Circulation* **113**, 791–798 (2006).
- 5  
6  
7 9. Yadlowsky, S. *et al.* Clinical Implications of Revised Pooled Cohort Equations for  
8 Estimating Atherosclerotic Cardiovascular Disease Risk. *Ann. Intern. Med.* **169**, 20  
9 (2018).
- 10  
11  
12  
13 10. Stumbo, P. Considerations for selecting a dietary assessment system. *J. Food*  
14 *Compos. Anal. Off. Publ. U. N. Univ. Int. Netw. Food Data Syst.* **21**, S13–S19  
15 (2008).
- 16  
17  
18  
19 11. Stewart, K. K. & Whitaker, J. R. *Modern Methods of Food Analysis*. (Springer  
20 Science & Business Media, 2012).
- 21  
22  
23 12. Kennedy, E. T., Ohls, J., Carlson, S. & Fleming, K. The Healthy Eating Index: Design  
24 and Applications. *J. Am. Diet. Assoc.* **95**, 1103–1108 (1995).
- 25  
26  
27  
28 13. McCullough, M. L. & Willett, W. C. Evaluating adherence to recommended diets in  
29 adults: the Alternate Healthy Eating Index. *Public Health Nutr.* **9**, (2006).
- 30  
31  
32  
33 14. Panagiotakos, D. B., Pitsavos, C. & Stefanadis, C. Dietary patterns: A Mediterranean  
34 diet score and its relation to clinical and biological markers of cardiovascular disease  
35 risk. *Nutr. Metab. Cardiovasc. Dis.* **16**, 559–568 (2006).
- 36  
37  
38  
39 15. Reedy, J. *et al.* Higher Diet Quality Is Associated with Decreased Risk of All-Cause,  
40 Cardiovascular Disease, and Cancer Mortality among Older Adults. *J. Nutr.* **144**,  
41 881–889 (2014).
- 42  
43  
44  
45 16. Onvani, S., Haghghatdoost, F., Surkan, P. J., Larijani, B. & Azadbakht, L.  
46 Adherence to the Healthy Eating Index and Alternative Healthy Eating Index dietary  
47 patterns and mortality from all causes, cardiovascular disease and cancer: a meta-  
48 analysis of observational studies. *J. Hum. Nutr. Diet.* **30**, 216–226 (2017).
- 49  
50  
51  
52  
53 17. Fung, T. T. *et al.* Mediterranean diet and incidence and mortality of coronary heart  
54 disease and stroke in women. *Circulation* **119**, 1093–1100 (2009).
- 55  
56  
57  
58  
59  
60



- 1  
2  
3 18. Akbaraly, T. N. *et al.* Alternative Healthy Eating Index and mortality over 18 y of  
4 follow-up: results from the Whitehall II cohort. *Am. J. Clin. Nutr.* **94**, 247–253 (2011).  
5  
6
- 7 19. Schwingshackl, L. & Hoffmann, G. Diet Quality as Assessed by the Healthy Eating  
8 Index, the Alternate Healthy Eating Index, the Dietary Approaches to Stop  
9 Hypertension Score, and Health Outcomes: A Systematic Review and Meta-Analysis  
10 of Cohort Studies. *J. Acad. Nutr. Diet.* **115**, 780-800.e5 (2015).  
11  
12
- 13 20. Kant, A. K. Indexes of Overall Diet Quality: A Review. *J. Am. Diet. Assoc.* **96**, 785–  
14 791 (1996).  
15  
16
- 17 21. Folsom, A. R., Parker, E. D. & Harnack, L. J. Degree of Concordance With DASH  
18 Diet Guidelines and Incidence of Hypertension and Fatal Cardiovascular Disease.  
19 *Am. J. Hypertens.* **20**, 225–232 (2007).  
20  
21
- 22 22. Fung, T. T. *et al.* Adherence to a DASH-Style Diet and Risk of Coronary Heart  
23 Disease and Stroke in Women. *Arch. Intern. Med.* **168**, 713–720 (2008).  
24  
25
- 26 23. Grundy, S. M. *et al.* 2018  
27 AHA/ACC/AACVPR/AAPA/ABC/ACPM/ADA/AGS/APhA/ASPC/NLA/PCNA  
28 Guideline on the Management of Blood Cholesterol: A Report of the American  
29 College of Cardiology/American Heart Association Task Force on Clinical Practice  
30 Guidelines. *J. Am. Coll. Cardiol.* 25709 (2018). doi:10.1016/j.jacc.2018.11.003  
31  
32
- 33 24. Bibbins-Domingo, K. *et al.* Statin Use for the Primary Prevention of Cardiovascular  
34 Disease in Adults: US Preventive Services Task Force Recommendation Statement.  
35 *JAMA* **316**, 1997–2007 (2016).  
36  
37
- 38 25. Bibbins-Domingo, K. & on behalf of the U.S. Preventive Services Task Force. Aspirin  
39 Use for the Primary Prevention of Cardiovascular Disease and Colorectal Cancer:  
40 U.S. Preventive Services Task Force Recommendation Statement. *Ann. Intern. Med.*  
41 **164**, 836 (2016).  
42  
43  
44  
45  
46  
47  
48  
49  
50  
51  
52  
53  
54  
55  
56  
57  
58  
59  
60

- 1  
2  
3 26. Whelton, P. K. *et al.* 2017  
4  
5 ACC/AHA/AAPA/ABC/ACPM/AGS/APhA/ASH/ASPC/NMA/PCNA Guideline for the  
6  
7 Prevention, Detection, Evaluation, and Management of High Blood Pressure in  
8  
9 Adults. *J. Am. Coll. Cardiol.* **71**, e127–e248 (2018).  
10  
11 27. Suresh, S., Saraswathi, S. & Sundararajan, N. Performance enhancement of  
12  
13 extreme learning machine for multi-category sparse data classification problems.  
14  
15 *Eng. Appl. Artif. Intell.* **23**, 1149–1157 (2010).  
16  
17 28. Messina, M., Lampe, J. W., Birt, D. F., Appel, L. J. & al, et. Reductionism and the  
18  
19 narrowing nutrition perspective: Time for reevaluation and emphasis on food  
20  
21 synergy. *Am. Diet. Assoc. J. Am. Diet. Assoc. Chic.* **101**, 1416–9 (2001).  
22  
23 29. Wang, J., Li, D., Dangott, L. J. & Wu, G. Proteomics and Its Role in Nutrition  
24  
25 Research,. *J. Nutr.* **136**, 1759–1762 (2006).  
26  
27 30. Marcos, A., Nova, E. & Montero, A. Changes in the immune system are conditioned  
28  
29 by nutrition. *Eur. J. Clin. Nutr.* **57**, S66–S69 (2003).  
30  
31 31. Zeisel, S. H. *et al.* Nutrition: A Reservoir for Integrative Science. *J. Nutr.* **131**, 1319–  
32  
33 1321 (2001).  
34  
35 32. Subar, A. F. *et al.* The Automated Self-Administered 24-Hour Dietary Recall  
36  
37 (ASA24): A Resource for Researchers, Clinicians, and Educators from the National  
38  
39 Cancer Institute. *J. Acad. Nutr. Diet.* **112**, 1134–1137 (2012).  
40  
41 33. Vereecken, C. A., Covents, M., Matthys, C. & Maes, L. Young adolescents' nutrition  
42  
43 assessment on computer (YANA-C). *Eur. J. Clin. Nutr.* **59**, 658–667 (2005).  
44  
45 34. Hongu, N. *et al.* Dietary Assessment Tools Using Mobile Technology. *Top. Clin.*  
46  
47 *Nutr.* **26**, 300 (2011).  
48  
49 35. Thompson, F. E. *et al.* Comparison of Interviewer-Administered and Automated Self-  
50  
51 Administered 24-Hour Dietary Recalls in 3 Diverse Integrated Health Systems. *Am.*  
52  
53 *J. Epidemiol.* **181**, 970–978 (2015).  
54  
55  
56  
57  
58  
59  
60

- 1  
2  
3 36. NHANES - About the National Health and Nutrition Examination Survey. (2017).  
4 Available at: [https://www.cdc.gov/nchs/nhanes/about\\_nhanes.htm](https://www.cdc.gov/nchs/nhanes/about_nhanes.htm). (Accessed: 11th  
5 March 2019)  
6  
7  
8  
9  
10 37. van Buuren, S. & Groothuis-Oudshoorn, K. mice: Multivariate Imputation by Chained  
11 Equations in R. *J. Stat. Softw.* **45**, 1–67 (2011).  
12  
13 38. Vergouwe, Y., Royston, P., Moons, K. G. M. & Altman, D. G. Development and  
14 validation of a prediction model with missing predictor data: a practical approach. *J.*  
15 *Clin. Epidemiol.* **63**, 205–214 (2010).  
16  
17 39. Chen, Y., Jia, Z., Mercola, D. & Xie, X. A Gradient Boosting Algorithm for Survival  
18 Analysis via Direct Optimization of Concordance Index. *Computational and*  
19 *Mathematical Methods in Medicine* (2013). doi:10.1155/2013/873595  
20  
21 40. Ishwaran, H., Kogalur, U. B., Blackstone, E. H. & Lauer, M. S. Random survival  
22 forests. *Ann. Appl. Stat.* **2**, 841–860 (2008).  
23  
24 41. Friedman, J. H. Stochastic gradient boosting. *Comput. Stat. Data Anal.* **38**, 367–378  
25 (2002).  
26  
27 42. Friedman, J. H. Greedy Function Approximation: A Gradient Boosting Machine. *Ann.*  
28 *Stat.* **29**, 1189–1232 (2001).  
29  
30 43. Quinlan, J. R. Induction of decision trees. *Mach. Learn.* **1**, 81–106 (1986).  
31  
32 44. Breiman, L. Random Forests. *Mach. Learn.* **45**, 5–32 (2001).  
33  
34 45. Friedman, J., Hastie, T. & Tibshirani, R. Additive logistic regression: a statistical view  
35 of boosting (With discussion and a rejoinder by the authors). *Ann. Stat.* **28**, 337–407  
36 (2000).  
37  
38 46. Guenther, P. M. *et al.* Update of the Healthy Eating Index: HEI-2010. *J. Acad. Nutr.*  
39 *Diet.* **113**, 569–580 (2013).  
40  
41 47. Chiuve, S. E. *et al.* Alternative Dietary Indices Both Strongly Predict Risk of Chronic  
42 Disease. *J. Nutr.* **142**, 1009–1018 (2012).  
43  
44  
45  
46  
47  
48  
49  
50  
51  
52  
53  
54  
55  
56  
57  
58  
59  
60

- 1  
2  
3 48. Trichopoulou, A., Costacou, T., Bamia, C. & Trichopoulos, D. Adherence to a  
4  
5 Mediterranean Diet and Survival in a Greek Population. *N. Engl. J. Med.* **348**, 2599–  
6  
7 2608 (2003).  
8  
9  
10 49. Günther, A. L. B. *et al.* Association Between the Dietary Approaches to Hypertension  
11  
12 Diet and Hypertension in Youth With Diabetes Mellitus. *Hypertension* **53**, 6–12  
13  
14 (2009).  
15  
16 50. Greenwell, B., Boehmke, B., Cunningham, J. & Developers ([https://github.com/gbm-](https://github.com/gbm-developers)  
17  
18 [developers](https://github.com/gbm-developers)), G. B. M. *gbm: Generalized Boosted Regression Models.* (2019).  
19  
20 51. Hothorn, T., Bühlmann, P., Dudoit, S., Molinaro, A. & Van Der Laan, M. J. Survival  
21  
22 ensembles. *Biostatistics* **7**, 355–373 (2006).  
23  
24 52. Hothorn, T., Hornik, K., Strobl, C. & Zeileis, A. *party: A Laboratory for Recursive*  
25  
26 *Partytioning.* (2019).  
27  
28 53. DeLong, E. R., DeLong, D. M. & Clarke-Pearson, D. L. Comparing the areas under  
29  
30 two or more correlated receiver operating characteristic curves: a nonparametric  
31  
32 approach. *Biometrics* **44**, 837–845 (1988).  
33  
34 54. Robin, X. *et al.* pROC: an open-source package for R and S+ to analyze and  
35  
36 compare ROC curves. *BMC Bioinformatics* **12**, 77 (2011).  
37  
38 55. StataCorp. *Stata Statistical Software: Release 15.* (StataCorp LLC, 2017).  
39  
40 56. R Core Team. *R: A language and environment for statistical computing.* (2018).  
41  
42 57. Collins, G. S., Reitsma, J. B., Altman, D. G. & Moons, K. G. M. Transparent  
43  
44 Reporting of a multivariable prediction model for Individual Prognosis Or Diagnosis  
45  
46 (TRIPOD): The TRIPOD Statement. *Ann. Intern. Med.* **162**, 55 (2015).  
47  
48 58. Yadlowsky, S. *et al.* Clinical Implications of Revised Pooled Cohort Equations for  
49  
50 Estimating Atherosclerotic Cardiovascular Disease Risk. *Ann. Intern. Med.* (2018).  
51  
52  
53  
54 doi:10.7326/M17-3011  
55  
56  
57  
58  
59  
60

- 1  
2  
3 59. Ridker, P. M. & Cook, N. R. Statins: new American guidelines for prevention of  
4 cardiovascular disease. *The Lancet* **382**, 1762–1765 (2013).  
5  
6  
7 60. Kant, A. K. Dietary patterns: biomarkers and chronic disease risk This paper is one of  
8 a selection of papers published in the CSCN–CSNS 2009 Conference, entitled Are  
9 dietary patterns the best way to make nutrition recommendations for chronic disease  
10 prevention? *Appl. Physiol. Nutr. Metab.* **35**, 199–206 (2010).  
11  
12  
13  
14  
15  
16 61. Boushey, C. J., Coulston, A. M., Rock, C. L. & Mosen, E. *Nutrition in the Prevention*  
17 *and Treatment of Disease*. (Elsevier, 2001).  
18  
19  
20  
21  
22  
23  
24  
25  
26  
27  
28  
29  
30  
31  
32  
33  
34  
35  
36  
37  
38  
39  
40  
41  
42  
43  
44  
45  
46  
47  
48  
49  
50  
51  
52  
53  
54  
55  
56  
57  
58  
59  
60

## Figure Legends

**Figure 1:** Calibration slopes and confidence intervals of models in the hold-out test set (National Health and Nutrition Examination Survey, 1999-2010 linked to the 2011 National Death Index, N= 12600). All models included demographic variables age, sex, and race (Black race, Hispanic ethnicity). ACC=American College of Cardiology covariates of total cholesterol (mg/dL), high-density lipoprotein cholesterol (HDL; mg/dL), systolic blood pressure (mmHg), blood pressure treatment status (yes/no), diabetes status (yes/no), and current smoking status (yes/no), HEI=healthy eating index, AHEI=alternative healthy eating index, MDS=Mediterranean diet score, DASH=dietary approaches to stop hypertension diet score, GBM=gradient boosted machine, RF=random forest

**Figure 2:** Model discrimination (C-statistic) in the hold-out test set (National Health and Nutrition Examination Survey, 1999-2010 linked to the 2011 National Death Index, N= 12600). All models included demographic variables age, sex, and race (Black race, Hispanic ethnicity). ACC=American College of Cardiology covariates of total cholesterol (mg/dL), high-density lipoprotein cholesterol (HDL; mg/dL), systolic blood pressure (mmHg), blood pressure treatment status (yes/no), diabetes status (yes/no), and current smoking status (yes/no), HEI=healthy eating index, AHEI=alternative healthy eating index, MDS=Mediterranean diet score, DASH=dietary approaches to stop hypertension diet score, GBM=gradient boosted machine, RF=random forest

## Tables

**Table 1:** Descriptive statistics on the study sample (National Health and Nutrition Examination Survey, 1999-2010 linked to the 2011 National Death Index, N=41990). Statistics are grouped to reflect participants in the training (n=29390/41990 = 70%) or test (n=12600/41990 = 30%) data subsets. CVD = cardiovascular disease, HEI=healthy eating index, AHEI=alternative healthy eating index, MDS=Mediterranean diet score, DASH=dietary approaches to stop hypertension diet score, GBM=gradient boosted machine, RF=random forest. Mean ( $\pm$ standard deviation) reported for continuous variables and N (%) reported for categorical variables.

|                                                            | <b>Training data<br/>for model<br/>derivation<br/>n=29390</b> | <b>Test data for<br/>model<br/>evaluation<br/>n=12600</b> | <b>P-value for<br/>difference<sup>1</sup></b> |
|------------------------------------------------------------|---------------------------------------------------------------|-----------------------------------------------------------|-----------------------------------------------|
| <b>CVD death</b>                                           |                                                               |                                                           |                                               |
| No                                                         | 28,211 (96.0%)                                                | 12,093<br>(96.0%)                                         | 0.96                                          |
| Yes                                                        | 1,179 (4.0%)                                                  | 507 (4.0%)                                                |                                               |
| <b>Heart disease death</b>                                 |                                                               |                                                           |                                               |
| No                                                         | 28,507 (97.0%)                                                | 12,214<br>(96.9%)                                         | 0.76                                          |
| Yes                                                        | 883 (3.0%)                                                    | 386 (3.1%)                                                |                                               |
| <b>Cerebrovascular<br/>death</b>                           |                                                               |                                                           |                                               |
| No                                                         | 29,094 (99.0%)                                                | 12,479<br>(99.0%)                                         | 0.71                                          |
| Yes                                                        | 296 (1.0%)                                                    | 121 (1.0%)                                                |                                               |
| <b>Time since interview<br/>(months)</b>                   | 79.3 ( $\pm$ 41.4)                                            | 79.4 ( $\pm$ 41.6)                                        | 0.84                                          |
| <b>Wave</b>                                                |                                                               |                                                           |                                               |
| 99-00                                                      | 3,810 (13.0%)                                                 | 1,633 (13.0%)                                             | 1.0                                           |
| 01-02                                                      | 8,853 (30.1%)                                                 | 3,795 (30.1%)                                             |                                               |
| 03-04                                                      | 3,926 (13.4%)                                                 | 1,684 (13.4%)                                             |                                               |
| 05-06                                                      | 3,891 (13.2%)                                                 | 1,669 (13.2%)                                             |                                               |
| 07-08                                                      | 4,353 (14.8%)                                                 | 1,866 (14.8%)                                             |                                               |
| 09-10                                                      | 4,557 (15.5%)                                                 | 1,953 (15.5%)                                             |                                               |
| <b>Age</b>                                                 | 50.0 ( $\pm$ 20.4)                                            | 50.1 ( $\pm$ 20.6)                                        | 0.60                                          |
| <b>Sex</b>                                                 |                                                               |                                                           |                                               |
| Male                                                       | 13,924 (47.4%)                                                | 5,887 (46.7%)                                             | 0.22                                          |
| Female                                                     | 15,466 (52.6%)                                                | 6,713 (53.3%)                                             |                                               |
| <b>Black</b>                                               |                                                               |                                                           |                                               |
| No                                                         | 14,807 (50.4%)                                                | 6,335 (50.3%)                                             | 0.94                                          |
| Yes                                                        | 5,882 (20.0%)                                                 | 2,511 (19.9%)                                             |                                               |
| Missing                                                    | 8,701 (29.6%)                                                 | 3,754 (29.8%)                                             |                                               |
| <b>Hispanic</b>                                            |                                                               |                                                           |                                               |
| No                                                         | 21,871 (74.4%)                                                | 9,359 (74.3%)                                             | 0.77                                          |
| Yes                                                        | 7,519 (25.6%)                                                 | 3,241 (25.7%)                                             |                                               |
| <b>Education level</b>                                     |                                                               |                                                           |                                               |
| <9th                                                       | 3,942 (13.4%)                                                 | 1,756 (13.9%)                                             | 0.087                                         |
| 9-11                                                       | 4,538 (15.4%)                                                 | 1,954 (15.5%)                                             |                                               |
| HS degree                                                  | 6,543 (22.3%)                                                 | 2,716 (21.6%)                                             |                                               |
| Some college or<br>Associate's                             | 7,138 (24.3%)                                                 | 2,986 (23.7%)                                             |                                               |
| College degree                                             | 5,061 (17.2%)                                                 | 2,268 (18.0%)                                             |                                               |
| Missing                                                    | 2,168 (7.4%)                                                  | 920 (7.3%)                                                |                                               |
| <b>Ratio of family<br/>income to poverty<br/>threshold</b> | 2.5 ( $\pm$ 1.6)                                              | 2.5 ( $\pm$ 1.6)                                          | 0.59                                          |
| Missing                                                    | 2,655 (9.0%)                                                  | 1,109 (8.8%)                                              |                                               |
| <b>Total chol</b>                                          | 198.0 ( $\pm$ 43.1)                                           | 198.0 ( $\pm$ 43.9)                                       | 0.86                                          |
| Missing                                                    | 3,641 (12.4%)                                                 | 1,484 (11.8%)                                             |                                               |

|                                             |                |                |       |
|---------------------------------------------|----------------|----------------|-------|
| <b>HDL</b>                                  | 45.5 (±23.0)   | 45.6 (±23.0)   | 0.36  |
| Missing                                     | 3,643 (12.4%)  | 1,484 (11.8%)  |       |
| <b>SBP</b>                                  | 125.4 (±20.6)  | 125.6 (±21.1)  | 0.38  |
| Missing                                     | 3,175 (10.8%)  | 1,348 (10.7%)  |       |
| <b>DBP</b>                                  | 69.9 (±12.6)   | 69.8 (±12.7)   | 0.50  |
| Missing                                     | 3,374 (11.5%)  | 1,431 (11.4%)  |       |
| <b>Number of blood pressure medications</b> |                |                |       |
| 0                                           | 19,892 (67.7%) | 8,436 (67.0%)  | 0.32  |
| 1                                           | 7,851 (26.7%)  | 3,452 (27.4%)  |       |
| 2 or more                                   | 1,647 (5.6%)   | 712 (5.7%)     |       |
| <b>Type 2 diabetes</b>                      |                |                |       |
| No                                          | 10,537 (35.9%) | 4,541 (36.0%)  | 0.42  |
| Yes                                         | 4,783 (16.3%)  | 2,008 (15.9%)  |       |
| Missing                                     | 14,070 (47.9%) | 6,051 (48.0%)  |       |
| <b>Smoking</b>                              |                |                |       |
| No                                          | 23,774 (80.9%) | 10,185 (80.8%) | 0.90  |
| Yes                                         | 5,615 (19.1%)  | 2,414 (19.2%)  |       |
| Missing                                     | 1 (0.0%)       | 1 (0.0%)       |       |
| <b>HEI</b>                                  | 47.0 (±11.0)   | 47.2 (±11.0)   | 0.28  |
| Missing                                     | 3,277 (11.2%)  | 1,361 (10.8%)  |       |
| <b>AHEI</b>                                 | 47.1 (±11.1)   | 47.1 (±11.0)   | 0.76  |
| Missing                                     | 3,263 (11.1%)  | 1,353 (10.7%)  |       |
| <b>MDS</b>                                  | 5.1 (±1.2)     | 5.1 (±1.2)     | 0.095 |
| Missing                                     | 3,270 (11.1%)  | 1,368 (10.9%)  |       |
| <b>DASH</b>                                 | 47.4 (±9.3)    | 47.4 (±9.4)    | 0.75  |
| Missing                                     | 8,835 (30.1%)  | 3,661 (29.1%)  |       |

<sup>1</sup>Wilcoxon rank sum test for continuous variables, e.g., age, and Fisher's exact test for categorical variables, e.g., black race

**Table 2:** Comparisons of participant characteristics by outcome (National Health and Nutrition Examination Survey, 1999-2010 linked to the 2011 National Death Index, N=41990). Descriptive summary of variables in those participants without CVD event (n=40304) vs. those with a CVD event (n=1686) during the follow-up period. Mean (±standard deviation) reported for continuous variables and N (%) reported for categorical variables.

|                                      | No CVD<br>n=40304 | CVD<br>n=1686 | P-value for<br>difference <sup>1</sup> |
|--------------------------------------|-------------------|---------------|----------------------------------------|
| <b>Time since interview (months)</b> | 80.3 (±41.4)      | 55.7 (±34.9)  | <0.0001                                |
| <b>Wave</b>                          |                   |               |                                        |
| 99-00                                | 5,168 (12.8%)     | 275 (16.3%)   | <0.0001                                |
| 01-02                                | 11,681 (29.0%)    | 967 (57.4%)   |                                        |
| 03-04                                | 5,401 (13.4%)     | 209 (12.4%)   |                                        |



|                                                    | No CVD         | CVD           | P-value for difference <sup>1</sup> |
|----------------------------------------------------|----------------|---------------|-------------------------------------|
| 05-06                                              | 5,451 (13.5%)  | 109 (6.5%)    |                                     |
| 07-08                                              | 6,127 (15.2%)  | 92 (5.5%)     |                                     |
| 09-10                                              | 6,476 (16.1%)  | 34 (2.0%)     |                                     |
| <b>Age</b>                                         | 49.0 (±20.1)   | 74.3 (±11.9)  | <0.0001                             |
| <b>Sex</b>                                         |                |               |                                     |
| Male                                               | 18,883 (46.9%) | 928 (55.0%)   | <0.0001                             |
| Female                                             | 21,421 (53.1%) | 758 (45.0%)   |                                     |
| <b>Black</b>                                       |                |               |                                     |
| No                                                 | 20,005 (49.6%) | 1,137 (67.4%) | <0.0001                             |
| Yes                                                | 8,110 (20.1%)  | 283 (16.8%)   |                                     |
| Missing                                            | 12,189 (30.2%) | 266 (15.8%)   |                                     |
| <b>Hispanic</b>                                    |                |               |                                     |
| No                                                 | 29,781 (73.9%) | 1,449 (85.9%) | <0.0001                             |
| Yes                                                | 10,523 (26.1%) | 237 (14.1%)   |                                     |
| <b>Education level</b>                             |                |               |                                     |
| <9th                                               | 5,223 (13.0%)  | 475 (28.2%)   | <0.0001                             |
| 9-11                                               | 6,201 (15.4%)  | 291 (17.3%)   |                                     |
| HS degree                                          | 8,923 (22.1%)  | 336 (19.9%)   |                                     |
| Some college or Associate's                        | 9,776 (24.3%)  | 348 (20.6%)   |                                     |
| College degree                                     | 7,111 (17.6%)  | 218 (12.9%)   |                                     |
| Missing                                            | 3,070 (7.6%)   | 18 (1.1%)     |                                     |
| <b>Ratio of family income to poverty threshold</b> | 2.5 (±1.6)     | 2.1 (±1.4)    | <0.0001                             |
| Missing                                            | 3,565 (8.8%)   | 199 (11.8%)   |                                     |
| <b>Total chol</b>                                  | 198.1 (±43.2)  | 196.2 (±47.0) | 0.10                                |
| Missing                                            | 4,670 (11.6%)  | 455 (27.0%)   |                                     |
| <b>HDL</b>                                         | 45.5 (±23.0)   | 45.0 (±24.2)  | 0.002                               |
| Missing                                            | 4,672 (11.6%)  | 455 (27.0%)   |                                     |
| <b>SBP</b>                                         | 124.8 (±20.3)  | 142.9 (±26.8) | <0.0001                             |
| Missing                                            | 4,114 (10.2%)  | 409 (24.3%)   |                                     |
| <b>DBP</b>                                         | 70.0 (±12.5)   | 67.5 (±14.7)  | <0.0001                             |
| Missing                                            | 4,359 (10.8%)  | 446 (26.5%)   |                                     |
| <b>Number of blood pressure medications</b>        |                |               |                                     |
| 0                                                  | 27,894 (69.2%) | 434 (25.7%)   | <0.0001                             |
| 1                                                  | 10,205 (25.3%) | 1,098 (65.1%) |                                     |
| 2 or more                                          | 2,205 (5.5%)   | 154 (9.1%)    |                                     |
| <b>Type 2 diabetes</b>                             |                |               |                                     |
| No                                                 | 14,680 (36.4%) | 398 (23.6%)   | <0.0001                             |
| Yes                                                | 6,229 (15.5%)  | 562 (33.3%)   |                                     |
| Missing                                            | 19,395 (48.1%) | 726 (43.1%)   |                                     |

|                                      | No CVD         | CVD           | P-value for difference <sup>1</sup>       |
|--------------------------------------|----------------|---------------|-------------------------------------------|
| <b>Smoking</b>                       |                |               |                                           |
| No                                   | 32,508 (80.7%) | 1,451 (86.1%) | <0.0001                                   |
| Yes                                  | 7,794 (19.3%)  | 235 (13.9%)   |                                           |
| Missing                              | 2 (0.0%)       | 0 (0.0%)      |                                           |
| <b>HEI</b>                           | 46.9 (±11.0)   | 51.0 (±10.3)  | <0.0001                                   |
| Missing                              | 4,179 (10.4%)  | 459 (27.2%)   |                                           |
| <b>AHEI</b>                          | 47.1 (±11.1)   | 48.0 (±10.9)  | 0.006                                     |
| Missing                              | 4,158 (10.3%)  | 458 (27.2%)   |                                           |
| <b>MDS</b>                           | 5.1 (±1.2)     | 5.1 (±1.2)    | 0.10                                      |
| Missing                              | 4,472 (11.1%)  | 166 (9.8%)    |                                           |
| <b>DASH</b>                          | 47.4 (±9.4)    | 48.1 (±9.2)   | 0.01                                      |
| Missing                              | 11,774 (29.2%) | 722 (42.8%)   |                                           |
|                                      | <b>No CVD</b>  | <b>CVD</b>    | <b>P-value for difference<sup>1</sup></b> |
|                                      | n=40304        | n=1686        |                                           |
| <b>Time since interview (months)</b> | 80.3 (±41.4)   | 55.7 (±34.9)  | <0.0001                                   |
| <b>Wave</b>                          |                |               |                                           |
| 99-00                                | 5,168 (12.8%)  | 275 (16.3%)   | <0.0001                                   |
| 01-02                                | 11,681 (29.0%) | 967 (57.4%)   |                                           |
| 03-04                                | 5,401 (13.4%)  | 209 (12.4%)   |                                           |
| 05-06                                | 5,451 (13.5%)  | 109 (6.5%)    |                                           |
| 07-08                                | 6,127 (15.2%)  | 92 (5.5%)     |                                           |
| 09-10                                | 6,476 (16.1%)  | 34 (2.0%)     |                                           |
| <b>Age</b>                           | 49.0 (±20.1)   | 74.3 (±11.9)  | <0.0001                                   |
| <b>Sex</b>                           |                |               |                                           |
| Male                                 | 18,883 (46.9%) | 928 (55.0%)   | <0.0001                                   |
| Female                               | 21,421 (53.1%) | 758 (45.0%)   |                                           |
| <b>Black</b>                         |                |               |                                           |
| No                                   | 20,005 (49.6%) | 1,137 (67.4%) | <0.0001                                   |
| Yes                                  | 8,110 (20.1%)  | 283 (16.8%)   |                                           |
| Missing                              | 12,189 (30.2%) | 266 (15.8%)   |                                           |
| <b>Hispanic</b>                      |                |               |                                           |
| No                                   | 29,781 (73.9%) | 1,449 (85.9%) | <0.0001                                   |
| Yes                                  | 10,523 (26.1%) | 237 (14.1%)   |                                           |
| <b>Education level</b>               |                |               |                                           |
| <9th                                 | 5,223 (13.0%)  | 475 (28.2%)   | <0.0001                                   |
| 9-11                                 | 6,201 (15.4%)  | 291 (17.3%)   |                                           |
| HS degree                            | 8,923 (22.1%)  | 336 (19.9%)   |                                           |
| Some college or Associate's          | 9,776 (24.3%)  | 348 (20.6%)   |                                           |

|                                                    | No CVD         | CVD           | P-value for difference <sup>1</sup> |
|----------------------------------------------------|----------------|---------------|-------------------------------------|
| College degree                                     | 7,111 (17.6%)  | 218 (12.9%)   |                                     |
| Missing                                            | 3,070 (7.6%)   | 18 (1.1%)     |                                     |
| <b>Ratio of family income to poverty threshold</b> | 2.5 (±1.6)     | 2.1 (±1.4)    | <0.0001                             |
| Missing                                            | 3,565 (8.8%)   | 199 (11.8%)   |                                     |
| <b>Total chol</b>                                  | 198.1 (±43.2)  | 196.2 (±47.0) | 0.10                                |
| Missing                                            | 4,670 (11.6%)  | 455 (27.0%)   |                                     |
| <b>HDL</b>                                         | 45.5 (±23.0)   | 45.0 (±24.2)  | 0.002                               |
| Missing                                            | 4,672 (11.6%)  | 455 (27.0%)   |                                     |
| <b>SBP</b>                                         | 124.8 (±20.3)  | 142.9 (±26.8) | <0.0001                             |
| Missing                                            | 4,114 (10.2%)  | 409 (24.3%)   |                                     |
| <b>DBP</b>                                         | 70.0 (±12.5)   | 67.5 (±14.7)  | <0.0001                             |
| Missing                                            | 4,359 (10.8%)  | 446 (26.5%)   |                                     |
| <b>Number of blood pressure medications</b>        |                |               |                                     |
| 0                                                  | 27,894 (69.2%) | 434 (25.7%)   | <0.0001                             |
| 1                                                  | 10,205 (25.3%) | 1,098 (65.1%) |                                     |
| 2 or more                                          | 2,205 (5.5%)   | 154 (9.1%)    |                                     |
| <b>Type 2 diabetes</b>                             |                |               |                                     |
| No                                                 | 14,680 (36.4%) | 398 (23.6%)   | <0.0001                             |
| Yes                                                | 6,229 (15.5%)  | 562 (33.3%)   |                                     |
| Missing                                            | 19,395 (48.1%) | 726 (43.1%)   |                                     |
| <b>Smoking</b>                                     |                |               |                                     |
| No                                                 | 32,508 (80.7%) | 1,451 (86.1%) | <0.0001                             |
| Yes                                                | 7,794 (19.3%)  | 235 (13.9%)   |                                     |
| Missing                                            | 2 (0.0%)       | 0 (0.0%)      |                                     |
| <b>HEI</b>                                         | 46.9 (±11.0)   | 51.0 (±10.3)  | <0.0001                             |
| Missing                                            | 4,179 (10.4%)  | 459 (27.2%)   |                                     |
| <b>AHEI</b>                                        | 47.1 (±11.1)   | 48.0 (±10.9)  | 0.006                               |
| Missing                                            | 4,158 (10.3%)  | 458 (27.2%)   |                                     |
| <b>MDS</b>                                         | 5.1 (±1.2)     | 5.1 (±1.2)    | 0.10                                |
| Missing                                            | 4,472 (11.1%)  | 166 (9.8%)    |                                     |
| <b>DASH</b>                                        | 47.4 (±9.4)    | 48.1 (±9.2)   | 0.01                                |
| Missing                                            | 11,774 (29.2%) | 722 (42.8%)   |                                     |

<sup>1</sup>Wilcoxon rank sum test for continuous variables, e.g., age, and Fisher's exact test for categorical variables, e.g., black race

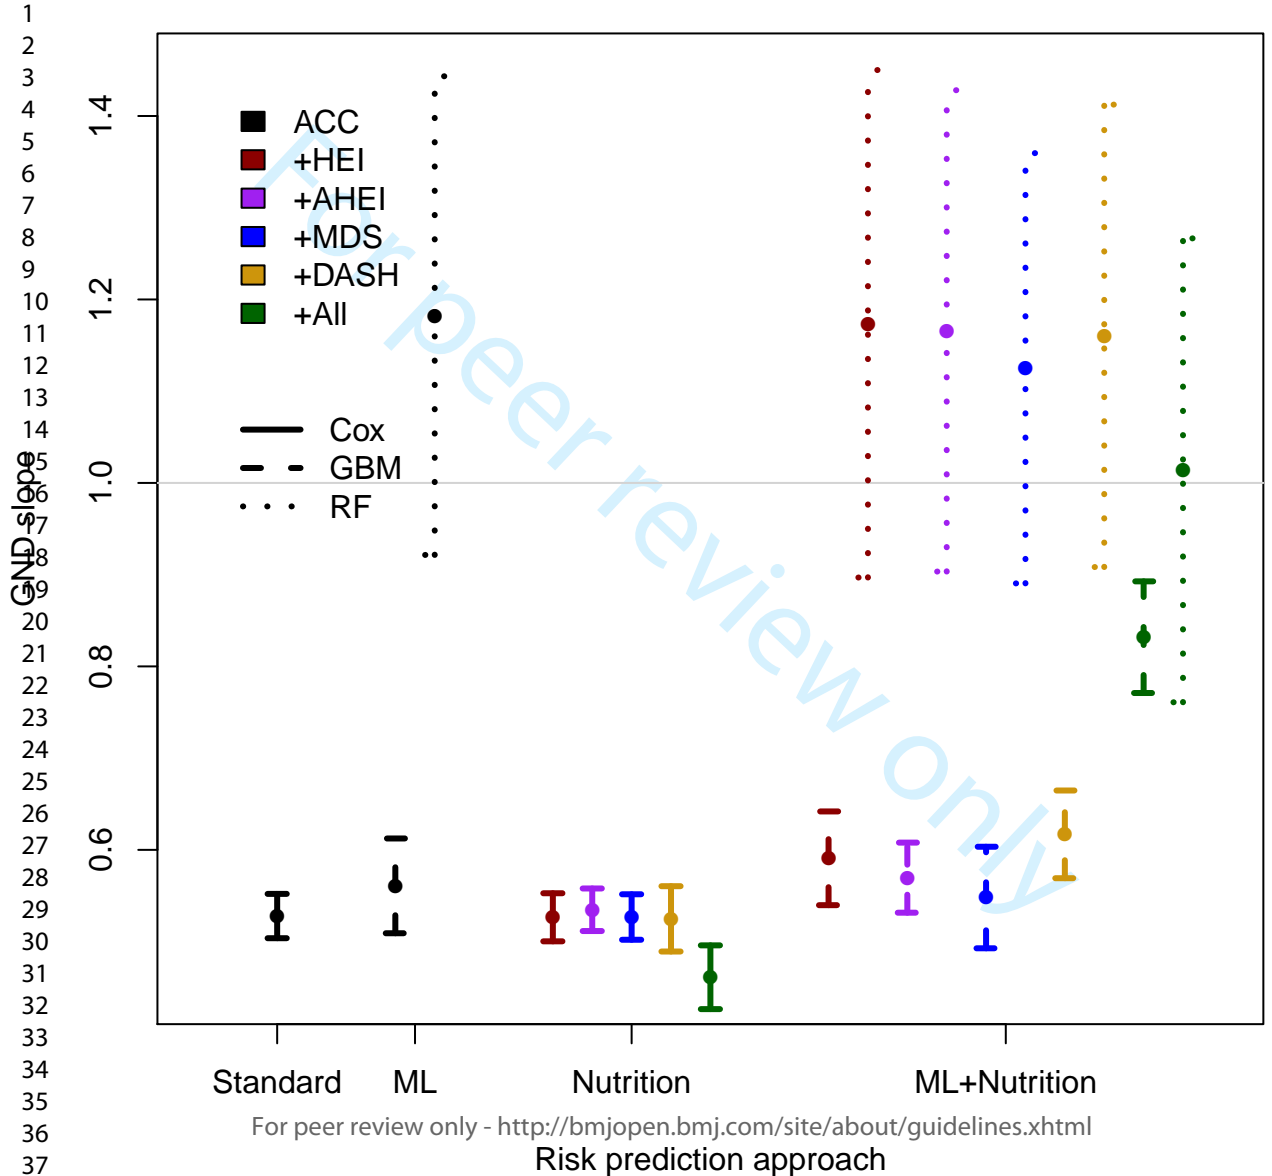

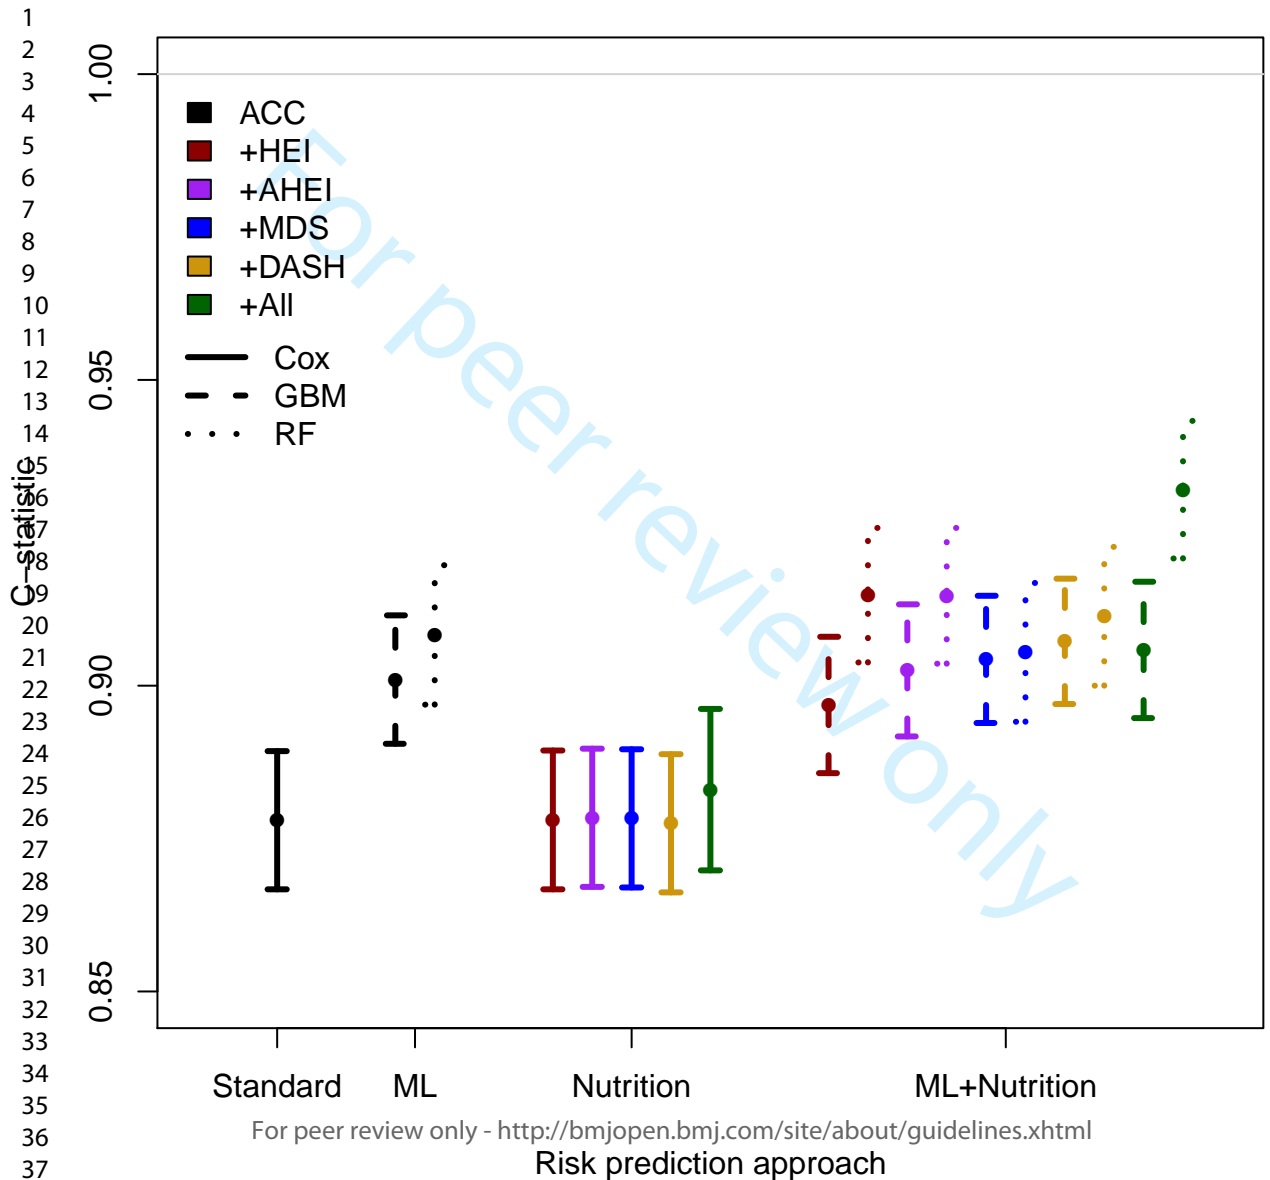

## Supplementary Appendix

### Figure Legends

**Supplementary Figure A:** Calibration slopes and confidence intervals of models in training set (National Health and Nutrition Examination Survey, 1999-2010 linked to the 2011 National Death Index, N= 12600). All models included demographic variables age, sex, and race (Black race, Hispanic ethnicity). ACC=American College of Cardiology covariates of total cholesterol (mg/dL), high-density lipoprotein cholesterol (HDL; mg/dL), systolic blood pressure (mmHg), blood pressure treatment status (yes/no), diabetes status (yes/no), and current smoking status (yes/no), HEI=healthy eating index, AHEI=alternative healthy eating index, MDS=Mediterranean diet score, DASH=dietary approaches to stop hypertension diet score, GBM=gradient boosted machine, RF=random forest

**Supplementary Figure B:** Model discrimination (C-statistic) in training set (National Health and Nutrition Examination Survey, 1999-2010 linked to the 2011 National Death Index, N= 12600). All models included demographic variables age, sex, and race (Black race, Hispanic ethnicity). ACC=American College of Cardiology covariates of total cholesterol (mg/dL), high-density lipoprotein cholesterol (HDL; mg/dL), systolic blood pressure (mmHg), blood pressure treatment status (yes/no), diabetes status (yes/no), and current smoking status (yes/no), HEI=healthy eating index, AHEI=alternative healthy eating index, MDS=Mediterranean diet score, DASH=dietary approaches to stop hypertension diet score, GBM=gradient boosted machine, RF=random forest

**Supplementary Figure C:** Partial dependence plots for best model (100 trees, interaction depth 5 using demographics, ACC variables, and full nutrition profile) for (a) age and (b) systolic blood pressure. Plots estimated by averaging model predictions for by decile of age or SBP.

**Supplementary Table A:** List of all predictor variables included in statistical models

| Variable name                            | Definition                                                                                                              |
|------------------------------------------|-------------------------------------------------------------------------------------------------------------------------|
| <b>Demographic and risk factors (4)</b>  |                                                                                                                         |
| age                                      | Age in years                                                                                                            |
| sex                                      | Sex (0 if male, 1 if female)                                                                                            |
| black                                    | Black race (0 if no, 1 if yes)                                                                                          |
| hispanic                                 | Hispanic ethnicity (0 if no, 1 if yes)                                                                                  |
| <b>ACC covariates (7)</b>                |                                                                                                                         |
| total_chol                               | Total cholesterol (mg/dL)                                                                                               |
| hdl                                      | HDL cholesterol (mg/dL)                                                                                                 |
| sbp                                      | Systolic blood pressure (mmHg)                                                                                          |
| dbp                                      | Diastolic blood pressure (mmHg)                                                                                         |
| bpmeds                                   | Number of blood pressure medications                                                                                    |
| dm                                       | Type 2 diabetes (0 if no, 1 if yes)                                                                                     |
| tob                                      | Current smoking (0 if no, 1 if yes)                                                                                     |
| <b>Composite nutrition variables (4)</b> |                                                                                                                         |
| hei                                      | Healthy eating index (0-100)                                                                                            |
| ahei                                     | Alternative healthy eating index (0-110)                                                                                |
| mds                                      | Mediterranean diet score (0-9)                                                                                          |
| dash                                     | DASH diet score (0-80)                                                                                                  |
| <b>24-hour recall variables (103)</b>    |                                                                                                                         |
| milk_g                                   | Milk and milk drinks (g)                                                                                                |
| cream_g                                  | Creams and cream substitutes (g)                                                                                        |
| milk_dessert_g                           | Milk desserts, sauces, gravies (g)                                                                                      |
| cheese_g                                 | Cheeses (g)                                                                                                             |
| meat_ns_g                                | Meat, not specified as to type (g)                                                                                      |
| beef_g                                   | Beef (g)                                                                                                                |
| pork_g                                   | Pork (g)                                                                                                                |
| lamb_g                                   | Lamb, veal, game, other carcass meat (g)                                                                                |
| poultry_g                                | Poultry (g)                                                                                                             |
| organ_meat_g                             | Organ meats, sausages, and lunchmeats, and meat spreads (g)                                                             |
| fish_g                                   | Fish and shellfish (g)                                                                                                  |
| meat_nonmeat_g                           | Meat, poultry, fish with nonmeat items (g)                                                                              |
| protein_frozen_g                         | Protein and shelf-stable plate meals, soups, and gravies with meat, poultry fish base; gelatin and gelatin-based drinks |
| eggs_g                                   | Eggs (g)                                                                                                                |
| egg_mixture_g                            | Egg mixtures (g)                                                                                                        |
| egg_sub_g                                | Egg substitutes (g)                                                                                                     |
| egg_frozen_g                             | Frozen plate meals with egg as major ingredient (g)                                                                     |
| legumes_g                                | Legumes (g)                                                                                                             |
| nuts_g                                   | Nuts, nut butters, and nut mixtures (g)                                                                                 |
| seeds_g                                  | Seeds and seed mixtures (g)                                                                                             |
| carob_g                                  | Carob products (g)                                                                                                      |
| flour_mix_g                              | Flour and dry mixes (g)                                                                                                 |
| bread_yeast_g                            | Yeast breads, rolls (g)                                                                                                 |
| bread_quick_g                            | Quick breads (g)                                                                                                        |
| pastries_g                               | Cakes, cookies, pies, pastries, bars (g)                                                                                |

1  
2  
3  
4  
5  
6  
7  
8  
9  
10  
11  
12  
13  
14  
15  
16  
17  
18  
19  
20  
21  
22  
23  
24  
25  
26  
27  
28  
29  
30  
31  
32  
33  
34  
35  
36  
37  
38  
39  
40  
41  
42  
43  
44  
45  
46  
47  
48  
49  
50  
51  
52  
53  
54  
55  
56  
57  
58  
59  
60

|                  |                                                                                        |
|------------------|----------------------------------------------------------------------------------------|
| crackers_g       | Crackers and salty snacks from grain products (g)                                      |
| pancakes_g       | Pancakes, waffles, French toast, other grain products (g)                              |
| pastas_g         | Pastas, cooked cereals, rice (g)                                                       |
| cereals_g        | Cereals, not cooked or not specified as to cooked (g)                                  |
| grain_mix_g      | Grain mixtures, frozen plate meals, soups (g)                                          |
| meat_sub_g       | Meat substitutes, mainly cereal protein (g)                                            |
| citrus_g         | Citrus fruits, juices (g)                                                              |
| fruit_dried_g    | Dried fruits (g)                                                                       |
| fruit_other_g    | Other fruits (g)                                                                       |
| fruit_juice_g    | Fruit juices and nectars excluding citrus (g)                                          |
| fruit_baby_g     | Fruit and juices baby food (g)                                                         |
| potatoes_g       | White potatoes and Puerto Rican starchy vegetables (g)                                 |
| veg_darkgreen_g  | Dark-green vegetables (g)                                                              |
| veg_deepyellow_g | Deep-yellow vegetables (g)                                                             |
| tomatoes_g       | Tomatoes and tomato mixtures (g)                                                       |
| veg_other_g      | Other vegetables (g)                                                                   |
| veg_baby_g       | Vegetables and mixtures mostly vegetables baby food (g)                                |
| veg_meat_g       | Vegetables with meat, poultry, fish (g)                                                |
| veg_mixture_g    | Mixtures mostly vegetables without meat, poultry, fish (g)                             |
| fats_g           | Fats (g)                                                                               |
| oils_g           | Oils (g)                                                                               |
| salad_dressing_g | Salad dressings (g)                                                                    |
| sweets_g         | Sugars and sweets (g)                                                                  |
| bev_nonalcohol_g | Nonalcoholic beverages (g)                                                             |
| bev_alcohol_g    | Alcoholic beverages (g)                                                                |
| water_g          | Water, noncarbonated (g)                                                               |
| bev_nutrition_g  | Formulated nutrition beverages, energy drinks, sports drinks, functional beverages (g) |
| kcal             | Energy (kcal)                                                                          |
| protein_g        | Protein (g)                                                                            |
| carb_g           | Carbohydrates (g)                                                                      |
| fiber_g          | Fiber (g)                                                                              |
| fat_g            | Fat (g)                                                                                |
| fat_sat_g        | Saturated fats (g)                                                                     |
| fat_mono_g       | Monounsaturated fats (g)                                                               |
| fat_poly_g       | Polyunsaturated fats (g)                                                               |
| cholesterol_mg   | Cholesterol (mg)                                                                       |
| vite_mg          | Vitamin-E as alpha-tocopherol (mg)                                                     |
| vita_mcg         | Vitamin A, RAE (mcg)                                                                   |
| betacar0_mcg     | Beta-carotene (mcg)                                                                    |
| vitb1_mg         | Thiamin (Vitamin B1) (mg)                                                              |
| vitb2_mg         | Riboflavin (Vitamin B2) (mg)                                                           |



1  
2  
3  
4  
5  
6  
7  
8  
9  
10  
11  
12  
13  
14  
15  
16  
17  
18  
19  
20  
21  
22  
23  
24  
25  
26  
27  
28  
29  
30  
31  
32  
33  
34  
35  
36  
37  
38  
39  
40  
41  
42  
43  
44  
45  
46  
47  
48  
49  
50  
51  
52  
53  
54  
55  
56  
57  
58  
59  
60

|                    |                                       |
|--------------------|---------------------------------------|
| niacin_mg          | Niacin (mg)                           |
| vitb6_mg           | Vitamin B6 (mg)                       |
| folate_mcg         | Total folate (mcg)                    |
| vitb12_mcg         | Vitamin B12 (mcg)                     |
| vitc_mg            | Vitamin C (mg)                        |
| calcium_mg         | Calcium (mg)                          |
| phosphorus_mg      | Phosphorus (mg)                       |
| magnesium_mg       | Magnesium (mg)                        |
| iron_mg            | Iron (mg)                             |
| zinc_mg            | Zinc (mg)                             |
| copper_mg          | Copper (mg)                           |
| sodium_mg          | Sodium (mg)                           |
| potassium_mg       | Potassium (mg)                        |
| selenium_mcg       | Selenium (mg)                         |
| caffeine_mg        | Caffeine (mg)                         |
| theobromine_mg     | Theobromine (mg)                      |
| alcohol_gm         | Alcohol (gm)                          |
| sfa_40_gm          | SFA 4:0 (Butanoic) (g)                |
| sfa_60_gm          | SFA 6:0 (Hexanoic) (g)                |
| sfa_80_gm          | SFA 8:0 (Octanoic) (g)                |
| sfa_100_gm         | SFA 10:0 (Decanoic) (g)               |
| sfa_120_gm         | SFA 12:0 (Dodecanoic) (g)             |
| sfa_140_gm         | SFA 14:0 (Tetradecanoic) (g)          |
| sfa_160_gm         | SFA 16:0 (Hexadecanoic) (g)           |
| sfa_180_gm         | SFA 18:0 (Octadecanoic) (g)           |
| mfa_161h_gm        | MFA 16:1 (Hexadecanoic) (g)           |
| mfa_161o_gm        | MFA 16:1 (Octadecanoic) (g)           |
| mfa_201_gm         | MFA 20:1 (Eicosenoic) (g)             |
| mfa_221_gm         | MFA 22:1 (Docosenoic) (g)             |
| pfa_182_gm         | PFA 18:2 (Octadecadienoic) (g)        |
| pfa_183_gm         | PFA 18:3 (Octadecatrienoic) (g)       |
| pfa_184_gm         | PFA 18:4 (Octadecatetraenoic) (g)     |
| pfa_204_gm         | PFA 20:4 (Eicosatetraenoic) (g)       |
| pfa_205_gm         | PFA 20:5 (Eicosapentaenoic) (g)       |
| pfa_225_gm         | PFA 22:5 (Docosapentaenoic) (g)       |
| pfa_226_gm         | PFA 22:6 (Docosahexaenoic) (g)        |
| water_yesterday_gm | Total plain water drank yesterday (g) |

**Supplementary Table B:** Percentage of missing data for variables included in analysis

| <b>Variable</b>  | <b>Percentage missing</b> |
|------------------|---------------------------|
| milk_g           | 10.99                     |
| cream_g          | 10.99                     |
| milk_dessert_g   | 10.99                     |
| cheese_g         | 10.99                     |
| meat_ns_g        | 10.99                     |
| beef_g           | 10.99                     |
| pork_g           | 10.99                     |
| lamb_g           | 10.99                     |
| poultry_g        | 10.99                     |
| organ_meat_g     | 10.99                     |
| fish_g           | 10.99                     |
| meat_nonmeat_g   | 10.99                     |
| protein_frozen_g | 10.99                     |
| eggs_g           | 10.99                     |
| egg_mixture_g    | 10.99                     |
| egg_sub_g        | 10.99                     |
| egg_frozen_g     | 10.99                     |
| legumes_g        | 10.99                     |
| nuts_g           | 10.99                     |
| seeds_g          | 10.99                     |
| carob_g          | 10.99                     |
| flour_mix_g      | 10.99                     |
| bread_yeast_g    | 10.99                     |
| bread_quick_g    | 10.99                     |
| pastries_g       | 10.99                     |
| crackers_g       | 10.99                     |
| pancakes_g       | 10.99                     |
| pastas_g         | 10.99                     |
| cereals_g        | 10.99                     |
| grain_mix_g      | 10.99                     |
| meat_sub_g       | 10.99                     |
| citrus_g         | 10.99                     |
| fruit_dried_g    | 10.99                     |
| fruit_other_g    | 10.99                     |
| fruit_juice_g    | 10.99                     |
| fruit_baby_g     | 10.99                     |
| potatoes_g       | 10.99                     |
| veg_darkgreen_g  | 10.99                     |
| veg_deepyellow_g | 10.99                     |
| tomatoes_g       | 10.99                     |
| veg_other_g      | 10.99                     |
| veg_baby_g       | 10.99                     |
| veg_meat_g       | 10.99                     |
| veg_mixture_g    | 10.99                     |

1  
2  
3  
4  
5  
6  
7  
8  
9  
10  
11  
12  
13  
14  
15  
16  
17  
18  
19  
20  
21  
22  
23  
24  
25  
26  
27  
28  
29  
30  
31  
32  
33  
34  
35  
36  
37  
38  
39  
40  
41  
42  
43  
44  
45  
46  
47  
48  
49  
50  
51  
52  
53  
54  
55  
56  
57  
58  
59  
60

| <b>Variable</b>  | <b>Percentage missing</b> |
|------------------|---------------------------|
| fats_g           | 10.99                     |
| oils_g           | 10.99                     |
| salad_dressing_g | 10.99                     |
| sweets_g         | 10.99                     |
| bev_nonalcohol_g | 10.99                     |
| bev_alcohol_g    | 10.99                     |
| water_g          | 10.99                     |
| bev_nutrition_g  | 10.99                     |
| permth_int       | 0.00                      |
| bpmeds           | 0.00                      |
| kcal             | 10.98                     |
| protein_g        | 10.98                     |
| carb_g           | 10.98                     |
| fiber_g          | 10.98                     |
| fat_g            | 10.98                     |
| fat_sat_g        | 10.98                     |
| fat_mono_g       | 10.98                     |
| fat_poly_g       | 10.98                     |
| cholesterol_mg   | 10.98                     |
| vite_mg          | 10.98                     |
| vita_mg          | 10.98                     |
| betacarot_mcg    | 10.98                     |
| vitb1_mg         | 10.98                     |
| vitb2_mg         | 10.98                     |
| niacin_mg        | 10.98                     |
| vitb6_mg         | 10.98                     |
| folate_mcg       | 10.98                     |
| vitb12_mcg       | 10.98                     |
| vitc_mg          | 10.98                     |
| calcium_mg       | 10.98                     |
| phosphorus_mg    | 10.98                     |
| magnesium_mg     | 10.98                     |
| iron_mg          | 10.98                     |
| zinc_mg          | 10.98                     |
| copper_mg        | 10.98                     |
| sodium_mg        | 10.98                     |
| potassium_mg     | 10.98                     |
| selenium_mcg     | 10.98                     |
| caffeine_mg      | 10.98                     |
| theobromine_mg   | 10.98                     |
| alcohol_gm       | 10.98                     |
| sfa_40_gm        | 10.98                     |
| sfa_60_gm        | 10.98                     |
| sfa_80_gm        | 10.98                     |
| sfa_100_gm       | 10.98                     |

| <b>Variable</b>    | <b>Percentage missing</b> |
|--------------------|---------------------------|
| sfa_120_gm         | 10.98                     |
| sfa_140_gm         | 10.98                     |
| sfa_160_gm         | 10.98                     |
| sfa_180_gm         | 10.98                     |
| mfa_161h_gm        | 10.98                     |
| mfa_161o_gm        | 10.98                     |
| mfa_201_gm         | 10.98                     |
| mfa_221_gm         | 10.98                     |
| pfa_182_gm         | 10.98                     |
| pfa_183_gm         | 10.98                     |
| pfa_184_gm         | 10.98                     |
| pfa_204_gm         | 10.98                     |
| pfa_205_gm         | 10.98                     |
| pfa_225_gm         | 10.98                     |
| pfa_226_gm         | 10.98                     |
| water_yesterday_gm | 10.82                     |
| age                | 0.00                      |
| sex                | 0.00                      |
| black              | 29.66                     |
| hispanic           | 0.00                      |
| sbp                | 10.77                     |
| tob                | 0.00                      |
| hdl                | 12.21                     |
| total_chol         | 12.21                     |
| pov                | 8.96                      |
| dm                 | 47.92                     |
| cvdevent           | 0.00                      |
| hd                 | 0.00                      |
| cereb              | 0.00                      |
| educ2              | 7.35                      |
| hei                | 11.05                     |
| ahei               | 10.99                     |
| mzs                | 11.05                     |
| dash               | 29.76                     |

## Supplementary Table C: TRIPOD checklist

| Title and abstract         |     |                                                                                                                                                                                                       | Page number                            |
|----------------------------|-----|-------------------------------------------------------------------------------------------------------------------------------------------------------------------------------------------------------|----------------------------------------|
| Title                      | 1   | Identify the study as developing and/or validating a multivariable prediction model, the target population, and the outcome to be predicted                                                           | 1                                      |
| Abstract                   | 2   | Provide a summary of objectives, study design, setting, participants, sample size, predictors, outcome, statistical analysis, results, and conclusions                                                | 2                                      |
| Introduction               |     |                                                                                                                                                                                                       |                                        |
| Background and objectives  | 3a  | Explain the medical context (including diagnostic or prognostic) and rationale for developing or validating the multivariable prediction model, including references to existing models               | 4-5                                    |
|                            | 3b  | Specify the objectives, including whether the study describes the development or validation of the model, or both                                                                                     | 4-5                                    |
| Methods                    |     |                                                                                                                                                                                                       |                                        |
| Source of data             | 4a  | Describe the study design or sources of data (e.g., randomized trial, cohort, or registry data), separately for the development and validation data sets, if applicable                               | 5                                      |
|                            | 4b  | Specify the key study dates, including start of accrual; end of accrual; and, if applicable, end of follow-up                                                                                         | 5                                      |
| Participants               | 5a  | Specify key elements of the study setting (e.g., primary care, secondary care, general population) including number and location of centers                                                           | 5                                      |
|                            | 5b  | Describe eligibility criteria for participants                                                                                                                                                        | 6                                      |
|                            | 5c  | Give details of treatments received, if relevant                                                                                                                                                      | N/A                                    |
| Outcome                    | 6a  | Clearly define the outcome that is predicted by the prediction model, including how and when assessed                                                                                                 | 6                                      |
|                            | 6b  | Report any actions to blind assessment of the outcome to be predicted                                                                                                                                 | 6                                      |
| Predictors                 | 7a  | Clearly define all predictors used in developing the multivariable prediction model, including how and when they were measured                                                                        | 6, Supp Table A                        |
|                            | 7b  | Report any actions to blind assessment of predictors for the outcome and other predictors                                                                                                             | 6                                      |
| Sample size                | 8   | Explain how the study size was arrived at                                                                                                                                                             | 7                                      |
| Missing data               | 9   | Describe how missing data were handled (e.g., complete-case analysis, single imputation, multiple imputation) with details of any imputation method                                                   | 7                                      |
| Statistical analysis       | 10a | Describe how predictors were handled in the analysis (D)                                                                                                                                              | 6-7                                    |
|                            | 10b | Specify type of model, all model-building procedures (including any predictor selection), and method for internal validation (D)                                                                      | 7-8                                    |
|                            | 10c | For validation, describe how predictions were calculated (V)                                                                                                                                          | 9                                      |
|                            | 10d | Specify all measures used to assess model performance and, if relevant, to compare multiple models                                                                                                    | 8-9                                    |
|                            | 10e | Describe any model updating (e.g., recalibration) arising from the validation, if done (V)                                                                                                            | 9                                      |
| Risk groups                | 11  | Provide details on how risk groups were created, if done                                                                                                                                              | N/A                                    |
| Development vs. validation | 12  | For validation, identify any differences from the development data in setting, eligibility criteria, outcome, and predictors (V)                                                                      | N/A                                    |
| Results                    |     |                                                                                                                                                                                                       |                                        |
| Participants               | 13a | Describe the flow of participants through the study, including the number of participants with and without the outcome and, if applicable, a summary of the follow-up time. A diagram may be helpful. | 10                                     |
|                            | 13b | Describe the characteristics of the participants (basic demographics, clinical features, available predictors), including number of participants with missing data for predictors and outcome         | 10, Table 1                            |
|                            | 13c | For validation, show a comparison with the development data of the distribution of important variables (demographics, predictors, and outcome) (V)                                                    | 10, Table 1                            |
| Model development          | 14a | Specify the number of participants and outcome events in each analysis (D)                                                                                                                            | 10-11                                  |
|                            | 14b | If done, report the unadjusted association between each candidate predictor and outcome (D)                                                                                                           | 12-13, Supp Table P                    |
| Model specification        | 15a | Present the full prediction model to allow predictions for individuals (i.e., all regression coefficients, and model intercept or baseline survival at a given time point) (D)                        | 12-13, Supp Table P, GitHub repository |
|                            | 15b | Explain how to use the prediction model (D)                                                                                                                                                           | 12-13                                  |
| Model performance          | 16  | Report performance measures (with CIs) for the prediction model                                                                                                                                       | 11-13                                  |
| Model updating             | 17  | If done, report the results from any model updating (i.e., model specification, model performance) (V)                                                                                                | N/A                                    |
| Discussion                 |     |                                                                                                                                                                                                       |                                        |
| Limitations                | 18  | Discuss any limitations of the study (such as non-representative sample, few events per predictor, missing data)                                                                                      | 15                                     |
| Interpretation             | 19a | For validation, discuss the results with reference to performance in the development data, and any other validation data (V)                                                                          | 14-15                                  |
|                            | 19b | Give an overall interpretation of the results, considering objectives, limitations, results from similar studies, and other relevant evidence                                                         | 15-16                                  |
| Implications               | 20  | Discuss the potential clinical use of the model and implications for future research                                                                                                                  | 15-16                                  |
| Other information          |     |                                                                                                                                                                                                       |                                        |
| Supplementary information  | 21  | Provide information about the availability of supplementary resources, such as study protocol, Web calculator, and data sets                                                                          | 10                                     |
| Funding                    | 22  | Give the source of funding and the role of the funders for the present study                                                                                                                          | 16                                     |

**Supplementary Table D:** *Internal validation results from models including demographic and ACC variables only. Criteria is equal to  $(\text{slope}-1)^2 + (\text{C-statistic}-1)^2$ .*

|                     | <b>Intercept</b>              | <b>Slope</b>               | <b>C-Statistic</b>         | <b>Criteria</b> |
|---------------------|-------------------------------|----------------------------|----------------------------|-----------------|
|                     | <b>95% CI</b>                 | <b>95% CI</b>              | <b>95% CI</b>              |                 |
| <b>Cox</b>          | 0.0011<br>-0.0016<br>0.0038   | 0.5144<br>0.4941<br>0.5348 | 0.8607<br>0.8517<br>0.8698 | 0.2552          |
| <b>GBM: 100, 1</b>  | -0.0004<br>-0.0070<br>0.0061  | 0.5415<br>0.4919<br>0.5910 | 0.8761<br>0.8680<br>0.8842 | 0.2256          |
| <b>GBM: 100, 5</b>  | -0.0022<br>-0.0044<br>0.0000  | 0.5550<br>0.5399<br>0.5702 | 0.8990<br>0.8912<br>0.9068 | 0.2082          |
| <b>GBM: 100, 10</b> | -0.0039<br>-0.0106<br>0.0029  | 0.5678<br>0.5237<br>0.6118 | 0.9163<br>0.9088<br>0.9238 | 0.1938          |
| <b>GBM: 300, 1</b>  | 0.0005<br>-0.0070<br>0.0079   | 0.5388<br>0.4847<br>0.5930 | 0.8747<br>0.8664<br>0.8831 | 0.2284          |
| <b>GBM: 300, 5</b>  | -0.0014<br>-0.0050<br>0.0023  | 0.5436<br>0.5186<br>0.5687 | 0.8963<br>0.8884<br>0.9042 | 0.2191          |
| <b>GBM: 300, 10</b> | -0.0038<br>-0.0068<br>-0.0007 | 0.5719<br>0.5514<br>0.5924 | 0.9140<br>0.9065<br>0.9215 | 0.1907          |
| <b>GBM: 500, 1</b>  | -0.0004<br>-0.0070<br>0.0062  | 0.5401<br>0.4908<br>0.5894 | 0.8767<br>0.8685<br>0.8849 | 0.2267          |
| <b>GBM: 500, 5</b>  | -0.0014<br>-0.0042<br>0.0015  | 0.5493<br>0.5295<br>0.5691 | 0.8985<br>0.8907<br>0.9063 | 0.2134          |
| <b>GBM: 500, 10</b> | -0.0020<br>-0.0052<br>0.0012  | 0.5488<br>0.5279<br>0.5696 | 0.9113<br>0.9037<br>0.9189 | 0.2114          |
| <b>RF: 100, 1</b>   | -0.0462<br>-0.0824<br>-0.0101 | 1.3190<br>0.8935<br>1.7445 | 0.9210<br>0.9140<br>0.9279 | 0.1080          |
| <b>RF: 100, 5</b>   | -0.0185<br>-0.0489<br>0.0118  | 0.7434<br>0.5668<br>0.9199 | 0.9728<br>0.9705<br>0.9751 | 0.0666          |
| <b>RF: 100, 10</b>  | -0.0191<br>-0.0526<br>0.0144  | 0.7191<br>0.5421<br>0.8961 | 0.9720<br>0.9696<br>0.9744 | 0.0797          |
| <b>RF: 300, 1</b>   | -0.0442<br>-0.0750<br>-0.0135 | 1.2884<br>0.9315<br>1.6454 | 0.9210<br>0.9140<br>0.9279 | 0.0894          |

|                    |         |        |        |        |
|--------------------|---------|--------|--------|--------|
| <b>RF: 300, 5</b>  | -0.0156 | 0.7380 | 0.9731 | 0.0694 |
|                    | -0.0409 | 0.5808 | 0.9708 |        |
|                    | 0.0096  | 0.8951 | 0.9755 |        |
| <b>RF: 300, 10</b> | -0.0194 | 0.7222 | 0.9724 | 0.0779 |
|                    | -0.0535 | 0.5423 | 0.9701 |        |
|                    | 0.0147  | 0.9021 | 0.9747 |        |
| <b>RF: 500, 1</b>  | -0.0475 | 1.3431 | 0.9272 | 0.1230 |
|                    | -0.0805 | 0.9557 | 0.9206 |        |
|                    | -0.0145 | 1.7304 | 0.9337 |        |
| <b>RF: 500, 5</b>  | -0.0198 | 0.7633 | 0.9763 | 0.0566 |
|                    | -0.0524 | 0.5706 | 0.9741 |        |
|                    | 0.0128  | 0.9560 | 0.9784 |        |
| <b>RF: 500, 10</b> | -0.0219 | 0.7462 | 0.9758 | 0.0650 |
|                    | -0.0610 | 0.5376 | 0.9736 |        |
|                    | 0.0172  | 0.9549 | 0.9780 |        |

**Supplementary Table E:** *Internal validation results from models including demographic, ACC variables, and HEI. Criteria is equal to  $(\text{slope}-1)^2 + (\text{C-statistic}-1)^2$ .*

|                     | <b>Intercept</b> | <b>Slope</b>  | <b>C-Statistic</b> | <b>Criteria</b> |
|---------------------|------------------|---------------|--------------------|-----------------|
|                     | <b>95% CI</b>    | <b>95% CI</b> | <b>95% CI</b>      |                 |
| <b>Cox</b>          | 0.0009           | 0.5165        | 0.8608             | 0.2531          |
|                     | -0.0018          | 0.4962        | 0.8517             |                 |
|                     | 0.0036           | 0.5368        | 0.8699             |                 |
| <b>GBM: 100, 1</b>  | -0.0006          | 0.5595        | 0.8762             | 0.2094          |
|                     | -0.0065          | 0.5159        | 0.8679             |                 |
|                     | 0.0054           | 0.6031        | 0.8845             |                 |
| <b>GBM: 100, 5</b>  | -0.0018          | 0.5513        | 0.8992             | 0.2115          |
|                     | -0.0041          | 0.5348        | 0.8914             |                 |
|                     | 0.0006           | 0.5678        | 0.9070             |                 |
| <b>GBM: 100, 10</b> | -0.0043          | 0.5829        | 0.9107             | 0.1819          |
|                     | -0.0113          | 0.5354        | 0.9027             |                 |
|                     | 0.0028           | 0.6305        | 0.9187             |                 |
| <b>GBM: 300, 1</b>  | -0.0015          | 0.5601        | 0.8752             | 0.2091          |
|                     | -0.0068          | 0.5200        | 0.8668             |                 |
|                     | 0.0037           | 0.6003        | 0.8837             |                 |
| <b>GBM: 300, 5</b>  | -0.0032          | 0.5638        | 0.9027             | 0.1997          |
|                     | -0.0071          | 0.5366        | 0.8950             |                 |
|                     | 0.0008           | 0.5910        | 0.9105             |                 |
| <b>GBM: 300, 10</b> | -0.0049          | 0.5859        | 0.9191             | 0.1780          |
|                     | -0.0106          | 0.5482        | 0.9118             |                 |
|                     | 0.0008           | 0.6236        | 0.9264             |                 |

|                     |         |        |        |        |
|---------------------|---------|--------|--------|--------|
| <b>GBM: 500, 1</b>  | -0.0007 | 0.5485 | 0.8754 | 0.2194 |
|                     | -0.0076 | 0.4959 | 0.8671 |        |
|                     | 0.0062  | 0.6011 | 0.8836 |        |
| <b>GBM: 500, 5</b>  | -0.0030 | 0.5680 | 0.9009 | 0.1964 |
|                     | -0.0063 | 0.5456 | 0.8931 |        |
|                     | 0.0002  | 0.5904 | 0.9088 |        |
| <b>GBM: 500, 10</b> | -0.0035 | 0.5777 | 0.9144 | 0.1857 |
|                     | -0.0086 | 0.5437 | 0.9068 |        |
|                     | 0.0016  | 0.6117 | 0.9219 |        |
| <b>RF: 100, 1</b>   | -0.0463 | 1.3193 | 0.9302 | 0.1068 |
|                     | -0.0772 | 0.9646 | 0.9239 |        |
|                     | -0.0154 | 1.6740 | 0.9365 |        |
| <b>RF: 100, 5</b>   | -0.0193 | 0.7561 | 0.9759 | 0.0601 |
|                     | -0.0512 | 0.5684 | 0.9737 |        |
|                     | 0.0125  | 0.9439 | 0.9782 |        |
| <b>RF: 100, 10</b>  | -0.0207 | 0.7366 | 0.9757 | 0.0700 |
|                     | -0.0575 | 0.5408 | 0.9735 |        |
|                     | 0.0160  | 0.9325 | 0.9779 |        |
| <b>RF: 300, 1</b>   | -0.0448 | 1.2936 | 0.9345 | 0.0905 |
|                     | -0.0793 | 0.9023 | 0.9285 |        |
|                     | -0.0102 | 1.6848 | 0.9405 |        |
| <b>RF: 300, 5</b>   | -0.0199 | 0.7645 | 0.9764 | 0.0560 |
|                     | -0.0523 | 0.5724 | 0.9742 |        |
|                     | 0.0125  | 0.9566 | 0.9785 |        |
| <b>RF: 300, 10</b>  | -0.0213 | 0.7440 | 0.9762 | 0.0661 |
|                     | -0.0591 | 0.5423 | 0.9740 |        |
|                     | 0.0164  | 0.9457 | 0.9783 |        |
| <b>RF: 500, 1</b>   | -0.0454 | 1.3038 | 0.9336 | 0.0967 |
|                     | -0.0815 | 0.8937 | 0.9275 |        |
|                     | -0.0094 | 1.7139 | 0.9397 |        |
| <b>RF: 500, 5</b>   | -0.0174 | 0.7627 | 0.9768 | 0.0568 |
|                     | -0.0459 | 0.5824 | 0.9746 |        |
|                     | 0.0112  | 0.9429 | 0.9789 |        |
| <b>RF: 500, 10</b>  | -0.0182 | 0.7384 | 0.9766 | 0.0690 |
|                     | -0.0500 | 0.5556 | 0.9744 |        |
|                     | 0.0137  | 0.9212 | 0.9787 |        |

**Supplementary Table F:** *Internal* validation results from models including demographic, ACC variables, and AHEI. Criteria is equal to  $(\text{slope}-1)^2 + (\text{C-statistic}-1)^2$ .

|  | <b>Intercept</b> | <b>Slope</b>  | <b>C-Statistic</b> | <b>Criteria</b> |
|--|------------------|---------------|--------------------|-----------------|
|  | <b>95% CI</b>    | <b>95% CI</b> | <b>95% CI</b>      |                 |



|    |                     |         |        |        |        |
|----|---------------------|---------|--------|--------|--------|
| 1  |                     |         |        |        |        |
| 2  |                     |         |        |        |        |
| 3  | <b>Cox</b>          | 0.0011  | 0.5142 | 0.8610 | 0.2553 |
| 4  |                     | -0.0009 | 0.4993 | 0.8520 |        |
| 5  |                     | 0.0031  | 0.5292 | 0.8701 |        |
| 6  | <b>GBM: 100, 1</b>  | -0.0012 | 0.5533 | 0.8761 | 0.2149 |
| 7  |                     | -0.0075 | 0.5057 | 0.8678 |        |
| 8  |                     | 0.0050  | 0.6008 | 0.8844 |        |
| 9  | <b>GBM: 100, 5</b>  | -0.0020 | 0.5502 | 0.8991 | 0.2125 |
| 10 |                     | -0.0060 | 0.5231 | 0.8912 |        |
| 11 |                     | 0.0019  | 0.5773 | 0.9071 |        |
| 12 | <b>GBM: 100, 10</b> | -0.0049 | 0.5887 | 0.9147 | 0.1764 |
| 13 |                     | -0.0116 | 0.5440 | 0.9070 |        |
| 14 |                     | 0.0017  | 0.6334 | 0.9225 |        |
| 15 | <b>GBM: 300, 1</b>  | -0.0004 | 0.5399 | 0.8760 | 0.2271 |
| 16 |                     | -0.0059 | 0.4989 | 0.8677 | 0.2271 |
| 17 |                     | 0.0051  | 0.5808 | 0.8842 | 0.2271 |
| 18 | <b>GBM: 300, 5</b>  | -0.0024 | 0.5586 | 0.8977 | 0.2053 |
| 19 |                     | -0.0050 | 0.5407 | 0.8897 |        |
| 20 |                     | 0.0001  | 0.5764 | 0.9057 |        |
| 21 | <b>GBM: 300, 10</b> | -0.0020 | 0.5685 | 0.9159 | 0.1933 |
| 22 |                     | -0.0066 | 0.5385 | 0.9081 |        |
| 23 |                     | 0.0026  | 0.5985 | 0.9237 |        |
| 24 | <b>GBM: 500, 1</b>  | -0.0005 | 0.5416 | 0.8762 | 0.2255 |
| 25 |                     | -0.0072 | 0.4909 | 0.8679 |        |
| 26 |                     | 0.0063  | 0.5922 | 0.8844 |        |
| 27 | <b>GBM: 500, 5</b>  | -0.0021 | 0.5564 | 0.8993 | 0.2069 |
| 28 |                     | -0.0055 | 0.5328 | 0.8916 |        |
| 29 |                     | 0.0013  | 0.5800 | 0.9071 |        |
| 30 | <b>GBM: 500, 10</b> | -0.0037 | 0.5697 | 0.9165 | 0.1921 |
| 31 |                     | -0.0110 | 0.5227 | 0.9089 |        |
| 32 |                     | 0.0035  | 0.6167 | 0.9242 |        |
| 33 | <b>RF: 100, 1</b>   | -0.0481 | 1.3493 | 0.9317 | 0.1267 |
| 34 |                     | -0.0844 | 0.9270 | 0.9255 |        |
| 35 |                     | -0.0118 | 1.7717 | 0.9379 |        |
| 36 | <b>RF: 100, 5</b>   | -0.0202 | 0.7717 | 0.9770 | 0.0526 |
| 37 |                     | -0.0539 | 0.5712 | 0.9749 |        |
| 38 |                     | 0.0135  | 0.9722 | 0.9791 |        |
| 39 | <b>RF: 100, 10</b>  | -0.0214 | 0.7427 | 0.9760 | 0.0668 |
| 40 |                     | -0.0596 | 0.5396 | 0.9739 |        |
| 41 |                     | 0.0168  | 0.9458 | 0.9782 |        |
| 42 | <b>RF: 300, 1</b>   | -0.0438 | 1.2788 | 0.9327 | 0.0823 |
| 43 |                     | -0.0756 | 0.9201 | 0.9267 |        |
| 44 |                     | -0.0120 | 1.6374 | 0.9387 |        |
| 45 | <b>RF: 300, 5</b>   | -0.0171 | 0.7559 | 0.9766 | 0.0601 |
| 46 |                     | -0.0450 | 0.5808 | 0.9745 |        |
| 47 |                     | 0.0109  | 0.9311 | 0.9788 |        |
| 48 |                     |         |        |        |        |
| 49 |                     |         |        |        |        |
| 50 |                     |         |        |        |        |
| 51 |                     |         |        |        |        |
| 52 |                     |         |        |        |        |
| 53 |                     |         |        |        |        |
| 54 |                     |         |        |        |        |
| 55 |                     |         |        |        |        |
| 56 |                     |         |        |        |        |
| 57 |                     |         |        |        |        |
| 58 |                     |         |        |        |        |
| 59 |                     |         |        |        |        |
| 60 |                     |         |        |        |        |

|                    |         |        |        |        |
|--------------------|---------|--------|--------|--------|
| <b>RF: 300, 10</b> | -0.0220 | 0.7478 | 0.9766 | 0.0642 |
|                    | -0.0613 | 0.5385 | 0.9745 |        |
|                    | 0.0173  | 0.9571 | 0.9787 |        |
| <b>RF: 500, 1</b>  | -0.0498 | 1.3774 | 0.9330 | 0.1469 |
|                    | -0.0862 | 0.9518 | 0.9269 |        |
|                    | -0.0135 | 1.8029 | 0.9391 |        |
| <b>RF: 500, 5</b>  | -0.0176 | 0.7642 | 0.9772 | 0.0561 |
|                    | -0.0467 | 0.5813 | 0.9750 |        |
|                    | 0.0115  | 0.9471 | 0.9793 |        |
| <b>RF: 500, 10</b> | -0.0183 | 0.7369 | 0.9768 | 0.0698 |
|                    | -0.0505 | 0.5538 | 0.9747 |        |
|                    | 0.0138  | 0.9200 | 0.9789 |        |

**Supplementary Table G:** *Internal* validation results from models including demographic, ACC variables, and MDS. Criteria is equal to  $(\text{slope}-1)^2 + (\text{C-statistic}-1)^2$ .

|                     | <b>Intercept</b> | <b>Slope</b>  | <b>C-Statistic</b> | <b>Criteria</b> |
|---------------------|------------------|---------------|--------------------|-----------------|
|                     | <b>95% CI</b>    | <b>95% CI</b> | <b>95% CI</b>      |                 |
| <b>Cox</b>          | 0.0009           | 0.5172        | 0.8609             | 0.2524          |
|                     | -0.0015          | 0.4991        | 0.8518             |                 |
|                     | 0.0033           | 0.5352        | 0.8700             |                 |
| <b>GBM: 100, 1</b>  | -0.0017          | 0.5647        | 0.8763             | 0.2048          |
|                     | -0.0064          | 0.5281        | 0.8680             |                 |
|                     | 0.0031           | 0.6012        | 0.8847             |                 |
| <b>GBM: 100, 5</b>  | -0.0010          | 0.5495        | 0.8973             | 0.2135          |
|                     | -0.0041          | 0.5284        | 0.8891             |                 |
|                     | 0.0020           | 0.5705        | 0.9055             |                 |
| <b>GBM: 100, 10</b> | -0.0043          | 0.5771        | 0.9166             | 0.1858          |
|                     | -0.0079          | 0.5530        | 0.9091             |                 |
|                     | -0.0007          | 0.6011        | 0.9241             |                 |
| <b>GBM: 300, 1</b>  | -0.0006          | 0.5417        | 0.8760             | 0.2254          |
|                     | -0.0075          | 0.4895        | 0.8677             |                 |
|                     | 0.0063           | 0.5939        | 0.8843             |                 |
| <b>GBM: 300, 5</b>  | -0.0020          | 0.5547        | 0.8997             | 0.2084          |
|                     | -0.0046          | 0.5367        | 0.8920             |                 |
|                     | 0.0005           | 0.5727        | 0.9073             |                 |
| <b>GBM: 300, 10</b> | -0.0037          | 0.5752        | 0.9151             | 0.1877          |
|                     | -0.0091          | 0.5395        | 0.9075             |                 |
|                     | 0.0017           | 0.6109        | 0.9227             |                 |
| <b>GBM: 500, 1</b>  | -0.0011          | 0.5551        | 0.8769             | 0.2131          |
|                     | -0.0074          | 0.5072        | 0.8687             |                 |
|                     | 0.0051           | 0.6029        | 0.8851             |                 |
| <b>GBM: 500, 5</b>  | -0.0019          | 0.5575        | 0.8984             | 0.2061          |
|                     | -0.0056          | 0.5317        | 0.8905             |                 |

|  |                     |         |        |        |        |
|--|---------------------|---------|--------|--------|--------|
|  |                     | 0.0018  | 0.5832 | 0.9063 |        |
|  | <b>GBM: 500, 10</b> | -0.0047 | 0.5814 | 0.9167 | 0.1822 |
|  |                     | -0.0115 | 0.5366 | 0.9092 |        |
|  |                     | 0.0021  | 0.6263 | 0.9242 |        |
|  | <b>RF: 100, 1</b>   | -0.0405 | 1.2255 | 0.9238 | 0.0567 |
|  |                     | -0.0689 | 0.9059 | 0.9175 |        |
|  |                     | -0.0121 | 1.5451 | 0.9302 |        |
|  | <b>RF: 100, 5</b>   | -0.0228 | 0.7646 | 0.9724 | 0.0562 |
|  |                     | -0.0598 | 0.5597 | 0.9701 |        |
|  |                     | 0.0142  | 0.9695 | 0.9748 |        |
|  | <b>RF: 100, 10</b>  | -0.0207 | 0.7390 | 0.9731 | 0.0688 |
|  |                     | -0.0569 | 0.5445 | 0.9707 |        |
|  |                     | 0.0155  | 0.9336 | 0.9754 |        |
|  | <b>RF: 300, 1</b>   | -0.0460 | 1.318  | 0.9262 | 0.1066 |
|  |                     | -0.0788 | 0.935  | 0.9197 |        |
|  |                     | -0.0132 | 1.701  | 0.9326 |        |
|  | <b>RF: 300, 5</b>   | -0.0169 | 0.7560 | 0.9733 | 0.0602 |
|  |                     | -0.0442 | 0.5829 | 0.9709 |        |
|  |                     | 0.0105  | 0.9291 | 0.9756 |        |
|  | <b>RF: 300, 10</b>  | -0.0209 | 0.7435 | 0.9734 | 0.0665 |
|  |                     | -0.0568 | 0.5489 | 0.9711 |        |
|  |                     | 0.0151  | 0.9380 | 0.9757 |        |
|  | <b>RF: 500, 1</b>   | -0.0457 | 1.3123 | 0.9274 | 0.1028 |
|  |                     | -0.0790 | 0.9259 | 0.9211 |        |
|  |                     | -0.0125 | 1.6988 | 0.9338 |        |
|  | <b>RF: 500, 5</b>   | -0.0168 | 0.7556 | 0.9734 | 0.0604 |
|  |                     | -0.0440 | 0.5833 | 0.9711 |        |
|  |                     | 0.0104  | 0.9280 | 0.9757 |        |
|  | <b>RF: 500, 10</b>  | -0.0178 | 0.7375 | 0.9737 | 0.0696 |
|  |                     | -0.0484 | 0.5601 | 0.9714 |        |
|  |                     | 0.0128  | 0.9149 | 0.9760 |        |

**Supplementary Table H:** *Internal* validation results from models including demographic, ACC variables, and DASH. Criteria is equal to  $(\text{slope}-1)^2 + (\text{C-statistic}-1)^2$ .

|                    | <b>Intercept</b> | <b>Slope</b>  | <b>C-Statistic</b> | <b>Criteria</b> |
|--------------------|------------------|---------------|--------------------|-----------------|
|                    | <b>95% CI</b>    | <b>95% CI</b> | <b>95% CI</b>      |                 |
| <b>Cox</b>         | 0.0009           | 0.5165        | 0.8615             | 0.2530          |
|                    | -0.0027          | 0.4896        | 0.8525             |                 |
|                    | 0.0045           | 0.5434        | 0.8706             |                 |
| <b>GBM: 100, 1</b> | -0.0006          | 0.5456        | 0.8769             | 0.2216          |
|                    | -0.0073          | 0.4949        | 0.8687             |                 |
|                    | 0.0061           | 0.5964        | 0.8851             |                 |

|    |                     |         |        |        |        |
|----|---------------------|---------|--------|--------|--------|
| 1  |                     |         |        |        |        |
| 2  |                     |         |        |        |        |
| 3  | <b>GBM: 100, 5</b>  | -0.0032 | 0.5684 | 0.9018 | 0.1959 |
| 4  |                     | -0.0074 | 0.5391 | 0.8940 |        |
| 5  |                     | 0.0010  | 0.5977 | 0.9097 |        |
| 6  | <b>GBM: 100, 10</b> | -0.0048 | 0.5825 | 0.9183 | 0.1810 |
| 7  |                     | -0.0099 | 0.5494 | 0.9108 |        |
| 8  |                     | 0.0002  | 0.6157 | 0.9258 |        |
| 9  | <b>GBM: 300, 1</b>  | -0.0006 | 0.5553 | 0.8766 | 0.2130 |
| 10 |                     | -0.0075 | 0.5052 | 0.8683 |        |
| 11 |                     | 0.0063  | 0.6054 | 0.8848 |        |
| 12 | <b>GBM: 300, 5</b>  | -0.0022 | 0.5545 | 0.8990 | 0.2087 |
| 13 |                     | -0.0064 | 0.5255 | 0.8910 |        |
| 14 |                     | 0.0020  | 0.5836 | 0.9069 |        |
| 15 | <b>GBM: 300, 10</b> | -0.0041 | 0.5727 | 0.9172 | 0.1894 |
| 16 |                     | -0.0105 | 0.5307 | 0.9098 |        |
| 17 |                     | 0.0023  | 0.6146 | 0.9245 |        |
| 18 | <b>GBM: 500, 1</b>  | -0.0004 | 0.5423 | 0.8772 | 0.2246 |
| 19 |                     | -0.0076 | 0.4880 | 0.8690 |        |
| 20 |                     | 0.0068  | 0.5965 | 0.8853 |        |
| 21 | <b>GBM: 500, 5</b>  | -0.0033 | 0.5719 | 0.9016 | 0.1930 |
| 22 |                     | -0.0078 | 0.5403 | 0.8938 |        |
| 23 |                     | 0.0013  | 0.6035 | 0.9094 |        |
| 24 | <b>GBM: 500, 10</b> | -0.0029 | 0.5674 | 0.9064 | 0.1959 |
| 25 |                     | -0.0083 | 0.5306 | 0.8986 |        |
| 26 |                     | 0.0025  | 0.6043 | 0.9141 |        |
| 27 | <b>RF: 100, 1</b>   | -0.0475 | 1.3431 | 0.9272 | 0.1230 |
| 28 |                     | -0.0805 | 0.9557 | 0.9206 |        |
| 29 |                     | -0.0145 | 1.7304 | 0.9337 |        |
| 30 | <b>RF: 100, 5</b>   | -0.0198 | 0.7633 | 0.9763 | 0.0566 |
| 31 |                     | -0.0524 | 0.5706 | 0.9741 |        |
| 32 |                     | 0.0128  | 0.9560 | 0.9784 |        |
| 33 | <b>RF: 100, 10</b>  | -0.0219 | 0.7462 | 0.9758 | 0.0650 |
| 34 |                     | -0.0610 | 0.5376 | 0.9736 |        |
| 35 |                     | 0.0172  | 0.9549 | 0.9780 |        |
| 36 | <b>RF: 300, 1</b>   | -0.0469 | 1.3320 | 0.9311 | 0.1150 |
| 37 |                     | -0.0817 | 0.9285 | 0.9249 |        |
| 38 |                     | -0.0121 | 1.7354 | 0.9372 |        |
| 39 | <b>RF: 300, 5</b>   | -0.0171 | 0.7578 | 0.9767 | 0.0592 |
| 40 |                     | -0.0451 | 0.5818 | 0.9746 |        |
| 41 |                     | 0.0108  | 0.9339 | 0.9789 |        |
| 42 | <b>RF: 300, 10</b>  | -0.0225 | 0.7558 | 0.9767 | 0.0602 |
| 43 |                     | -0.0630 | 0.5384 | 0.9746 |        |
| 44 |                     | 0.0179  | 0.9731 | 0.9788 |        |
| 45 | <b>RF: 500, 1</b>   | -0.0439 | 1.2784 | 0.9309 | 0.0823 |
| 46 |                     | -0.0757 | 0.9184 | 0.9247 |        |
| 47 |                     | -0.0121 | 1.6383 | 0.9370 |        |
| 48 |                     |         |        |        |        |
| 49 |                     |         |        |        |        |
| 50 |                     |         |        |        |        |
| 51 |                     |         |        |        |        |
| 52 |                     |         |        |        |        |
| 53 |                     |         |        |        |        |
| 54 |                     |         |        |        |        |
| 55 |                     |         |        |        |        |
| 56 |                     |         |        |        |        |
| 57 |                     |         |        |        |        |
| 58 |                     |         |        |        |        |
| 59 |                     |         |        |        |        |
| 60 |                     |         |        |        |        |

|                    |         |        |        |        |
|--------------------|---------|--------|--------|--------|
| <b>RF: 500, 5</b>  | -0.0176 | 0.7640 | 0.9766 | 0.0562 |
|                    | -0.0467 | 0.5804 | 0.9745 |        |
|                    | 0.0115  | 0.9476 | 0.9788 |        |
| <b>RF: 500, 10</b> | -0.0184 | 0.7408 | 0.9766 | 0.0677 |
|                    | -0.0506 | 0.5556 | 0.9745 |        |
|                    | 0.0138  | 0.9260 | 0.9787 |        |

**Supplementary Table I:** *Internal validation results from models including demographic, ACC variables, and nutrition variables. Criteria is equal to  $(\text{slope}-1)^2 + (\text{C-statistic}-1)^2$ .*

|                     | <b>Intercept</b> | <b>Slope</b>  | <b>C-Statistic</b> | <b>Criteria</b> |
|---------------------|------------------|---------------|--------------------|-----------------|
|                     | <b>95% CI</b>    | <b>95% CI</b> | <b>95% CI</b>      |                 |
| <b>Cox</b>          | 0.0007           | 0.5156        | 0.8750             | 0.2503          |
|                     | -0.0016          | 0.4991        | 0.8661             |                 |
|                     | 0.0031           | 0.5321        | 0.8838             |                 |
| <b>GBM: 100, 1</b>  | -0.0027          | 0.5748        | 0.8811             | 0.1949          |
|                     | -0.0075          | 0.5386        | 0.8729             |                 |
|                     | 0.0021           | 0.6111        | 0.8894             |                 |
| <b>GBM: 100, 5</b>  | -0.0063          | 0.6183        | 0.9169             | 0.1526          |
|                     | -0.0121          | 0.5778        | 0.9092             |                 |
|                     | -0.0004          | 0.6589        | 0.9246             |                 |
| <b>GBM: 100, 10</b> | -0.0088          | 0.6767        | 0.9377             | 0.1084          |
|                     | -0.0203          | 0.5990        | 0.9309             |                 |
|                     | 0.0026           | 0.7545        | 0.9445             |                 |
| <b>GBM: 300, 1</b>  | -0.0024          | 0.5723        | 0.8793             | 0.1975          |
|                     | -0.0071          | 0.5354        | 0.8707             |                 |
|                     | 0.0024           | 0.6091        | 0.8878             |                 |
| <b>GBM: 300, 5</b>  | -0.0066          | 0.6294        | 0.9135             | 0.1448          |
|                     | -0.0140          | 0.5778        | 0.9059             |                 |
|                     | 0.0007           | 0.6811        | 0.9211             |                 |
| <b>GBM: 300, 10</b> | -0.0061          | 0.6427        | 0.9228             | 0.1336          |
|                     | -0.0152          | 0.5795        | 0.9152             |                 |
|                     | 0.0029           | 0.7060        | 0.9303             |                 |
| <b>GBM: 500, 1</b>  | -0.0020          | 0.5616        | 0.8785             | 0.2070          |
|                     | -0.0077          | 0.5188        | 0.8700             |                 |
|                     | 0.0036           | 0.6044        | 0.8870             |                 |
| <b>GBM: 500, 5</b>  | -0.0073          | 0.6395        | 0.9160             | 0.1370          |
|                     | -0.0161          | 0.5770        | 0.9082             |                 |
|                     | 0.0016           | 0.7020        | 0.9239             |                 |
| <b>GBM: 500, 10</b> | -0.0083          | 0.6644        | 0.9314             | 0.1173          |
|                     | -0.0183          | 0.5961        | 0.9242             |                 |
|                     | 0.0016           | 0.7327        | 0.9386             |                 |

|                    |         |        |        |        |
|--------------------|---------|--------|--------|--------|
| <b>RF: 100, 1</b>  | -0.1754 | 3.3994 | 0.9874 | 5.7573 |
|                    | -0.2884 | 1.7584 | 0.9853 |        |
|                    | -0.0624 | 5.0405 | 0.9895 |        |
| <b>RF: 100, 5</b>  | -0.0427 | 1.2353 | 0.9967 | 0.0554 |
|                    | -0.0884 | 0.8154 | 0.9960 |        |
|                    | 0.0029  | 1.6552 | 0.9973 |        |
| <b>RF: 100, 10</b> | -0.0328 | 1.0458 | 0.9942 | 0.0021 |
|                    | -0.0743 | 0.7056 | 0.9932 |        |
|                    | 0.0087  | 1.3860 | 0.9952 |        |
| <b>RF: 300, 1</b>  | -0.1742 | 3.3849 | 0.9919 | 5.6878 |
|                    | -0.2843 | 1.7938 | 0.9903 |        |
|                    | -0.0642 | 4.9760 | 0.9934 |        |
| <b>RF: 300, 5</b>  | -0.0432 | 1.2387 | 0.9969 | 0.0570 |
|                    | -0.0884 | 0.8230 | 0.9963 |        |
|                    | 0.0021  | 1.6544 | 0.9975 |        |
| <b>RF: 300, 10</b> | -0.0333 | 1.0426 | 0.9943 | 0.0018 |
|                    | -0.0739 | 0.7138 | 0.9934 |        |
|                    | 0.0072  | 1.3713 | 0.9953 |        |
| <b>RF: 500, 1</b>  | -0.1813 | 3.4987 | 0.9921 | 6.2436 |
|                    | -0.2962 | 1.8260 | 0.9907 |        |
|                    | -0.0664 | 5.1713 | 0.9935 |        |
| <b>RF: 500, 5</b>  | -0.0436 | 1.2453 | 0.9970 | 0.0602 |
|                    | -0.0885 | 0.8311 | 0.9964 |        |
|                    | 0.0013  | 1.6596 | 0.9976 |        |
| <b>RF: 500, 10</b> | -0.0337 | 1.0453 | 0.9944 | 0.0021 |
|                    | -0.0743 | 0.7155 | 0.9934 |        |
|                    | 0.0069  | 1.3751 | 0.9953 |        |

**Table J:** External validation results from models including demographic and ACC variables only. Criteria is equal to  $(\text{slope}-1)^2 + (\text{C-statistic}-1)^2$ . Best performing GBM and RF are italicized.

|                    | <b>Intercept</b> | <b>Slope</b>  | <b>C-Statistic</b> | <b>Criteria</b> |
|--------------------|------------------|---------------|--------------------|-----------------|
|                    | <b>95% CI</b>    | <b>95% CI</b> | <b>95% CI</b>      |                 |
| <b>Cox</b>         | -0.0004          | 0.5278        | 0.8780             | 0.2379          |
|                    | -0.0038          | 0.5037        | 0.8667             |                 |
|                    | 0.0029           | 0.5520        | 0.8893             |                 |
| <b>GBM: 100, 1</b> | -0.0004          | 0.5276        | 0.8846             | 0.2365          |
|                    | -0.0096          | 0.4621        | 0.8737             |                 |
|                    | 0.0088           | 0.5931        | 0.8956             |                 |
| <b>GBM: 100, 5</b> | 0.0004           | 0.5294        | 0.8948             | 0.2325          |
|                    | -0.0064          | 0.4828        | 0.8840             |                 |
|                    | 0.0072           | 0.5761        | 0.9056             |                 |

1  
2  
3  
4  
5  
6  
7  
8  
9  
10  
11  
12  
13  
14  
15  
16  
17  
18  
19  
20  
21  
22  
23  
24  
25  
26  
27  
28  
29  
30  
31  
32  
33  
34  
35  
36  
37  
38  
39  
40  
41  
42  
43  
44  
45  
46  
47  
48  
49  
50  
51  
52  
53  
54  
55  
56  
57  
58  
59  
60

|                     |         |        |        |        |
|---------------------|---------|--------|--------|--------|
| <b>GBM: 100, 10</b> | 0.0020  | 0.5358 | 0.9020 | 0.2251 |
|                     | -0.0050 | 0.4875 | 0.8914 |        |
|                     | 0.0090  | 0.5841 | 0.9126 |        |
| <b>GBM: 300, 1</b>  | 0.0004  | 0.5250 | 0.8838 | 0.2391 |
|                     | -0.0101 | 0.4532 | 0.8728 |        |
|                     | 0.0108  | 0.5968 | 0.8948 |        |
| <b>GBM: 300, 5</b>  | 0.0017  | 0.5254 | 0.8919 | 0.2369 |
|                     | -0.0063 | 0.4696 | 0.8810 |        |
|                     | 0.0097  | 0.5813 | 0.9027 |        |
| <b>GBM: 300, 10</b> | 0.0004  | 0.5342 | 0.9022 | 0.2265 |
|                     | -0.0058 | 0.4932 | 0.8917 |        |
|                     | 0.0065  | 0.5751 | 0.9128 |        |
| <b>GBM: 500, 1</b>  | 0.0005  | 0.5173 | 0.8843 | 0.2464 |
|                     | -0.0102 | 0.4408 | 0.8733 |        |
|                     | 0.0113  | 0.5939 | 0.8952 |        |
| <b>GBM: 500, 5</b>  | 0.0011  | 0.5306 | 0.8944 | 0.2315 |
|                     | -0.0052 | 0.4869 | 0.8837 |        |
|                     | 0.0074  | 0.5743 | 0.9052 |        |
| <b>GBM: 500, 10</b> | 0.0030  | 0.5608 | 0.9010 | 0.2027 |
|                     | -0.0042 | 0.5091 | 0.8905 |        |
|                     | 0.0102  | 0.6124 | 0.9115 |        |
| <b>RF: 100, 1</b>   | -0.0427 | 1.2546 | 0.9097 | 0.0730 |
|                     | -0.0744 | 0.8887 | 0.8982 |        |
|                     | -0.0109 | 1.6204 | 0.9213 |        |
| <b>RF: 100, 5</b>   | -0.0077 | 0.6025 | 0.9273 | 0.1633 |
|                     | -0.0224 | 0.5196 | 0.9167 |        |
|                     | 0.0070  | 0.6853 | 0.9379 |        |
| <b>RF: 100, 10</b>  | -0.0051 | 0.5591 | 0.9260 | 0.1999 |
|                     | -0.0176 | 0.4954 | 0.9157 |        |
|                     | 0.0075  | 0.6228 | 0.9363 |        |
| <b>RF: 300, 1</b>   | -0.0380 | 1.1824 | 0.9083 | 0.0417 |
|                     | -0.0609 | 0.9215 | 0.8969 |        |
|                     | -0.0150 | 1.4433 | 0.9197 |        |
| <b>RF: 300, 5</b>   | -0.0058 | 0.5959 | 0.9281 | 0.1685 |
|                     | -0.0171 | 0.5279 | 0.9180 |        |
|                     | 0.0055  | 0.6639 | 0.9383 |        |
| <b>RF: 300, 10</b>  | -0.0046 | 0.5559 | 0.9269 | 0.2026 |
|                     | -0.0163 | 0.4970 | 0.9167 |        |
|                     | 0.0070  | 0.6149 | 0.9371 |        |
| <b>RF: 500, 1</b>   | -0.0410 | 1.2346 | 0.9079 | 0.0635 |
|                     | -0.0659 | 0.9484 | 0.8963 |        |
|                     | -0.0162 | 1.5207 | 0.9195 |        |
| <b>RF: 500, 5</b>   | -0.0066 | 0.5966 | 0.9281 | 0.1679 |
|                     | -0.0186 | 0.5278 | 0.9182 |        |
|                     | 0.0053  | 0.6654 | 0.9381 |        |

|                    |         |        |        |        |
|--------------------|---------|--------|--------|--------|
| <b>RF: 500, 10</b> | -0.0060 | 0.5671 | 0.9274 | 0.1927 |
|                    | -0.0201 | 0.4952 | 0.9173 |        |
|                    | 0.0080  | 0.6390 | 0.9375 |        |

**Supplementary Table K:** *External validation results from models including demographic, ACC variables, and HEI. Criteria is equal to (slope-1)<sup>2</sup> + (C-statistic-1)<sup>2</sup>. Best performing GBM and RF are italicized.*

|                     | <b>Intercept</b> | <b>Slope</b>  | <b>C-Statistic</b> | <b>Criteria</b> |
|---------------------|------------------|---------------|--------------------|-----------------|
|                     | <b>95% CI</b>    | <b>95% CI</b> | <b>95% CI</b>      |                 |
| <b>Cox</b>          | -0.0003          | 0.5265        | 0.8781             | 0.2391          |
|                     | -0.0040          | 0.5003        | 0.8667             |                 |
|                     | 0.0033           | 0.5527        | 0.8894             |                 |
| <b>GBM: 100, 1</b>  | 0.0005           | 0.5395        | 0.8846             | 0.2254          |
|                     | -0.0110          | 0.4587        | 0.8734             |                 |
|                     | 0.0120           | 0.6204        | 0.8958             |                 |
| <b>GBM: 100, 5</b>  | 0.0012           | 0.5513        | 0.8943             | 0.2125          |
|                     | -0.0071          | 0.4910        | 0.8834             |                 |
|                     | 0.0096           | 0.6116        | 0.9051             |                 |
| <b>GBM: 100, 10</b> | 0.0020           | 0.5908        | 0.8968             | 0.1781          |
|                     | -0.0048          | 0.5397        | 0.8857             |                 |
|                     | 0.0088           | 0.6419        | 0.9080             |                 |
| <b>GBM: 300, 1</b>  | -0.0006          | 0.5416        | 0.8843             | 0.2235          |
|                     | -0.0110          | 0.4644        | 0.8731             |                 |
|                     | 0.0098           | 0.6187        | 0.8955             |                 |
| <b>GBM: 300, 5</b>  | 0.0007           | 0.5469        | 0.8963             | 0.2161          |
|                     | -0.0062          | 0.4975        | 0.8855             |                 |
|                     | 0.0077           | 0.5963        | 0.9070             |                 |
| <b>GBM: 300, 10</b> | 0.0012           | 0.5769        | 0.9035             | 0.1883          |
|                     | -0.0063          | 0.5229        | 0.8929             |                 |
|                     | 0.0087           | 0.6309        | 0.9142             |                 |
| <b>GBM: 500, 1</b>  | -0.0003          | 0.5362        | 0.8843             | 0.2285          |
|                     | -0.0097          | 0.4677        | 0.8733             |                 |
|                     | 0.0091           | 0.6047        | 0.8954             |                 |
| <b>GBM: 500, 5</b>  | 0.0012           | 0.5594        | 0.8969             | 0.2048          |
|                     | -0.0068          | 0.5011        | 0.8858             |                 |
|                     | 0.0092           | 0.6177        | 0.9081             |                 |
| <b>GBM: 500, 10</b> | 0.0009           | 0.5699        | 0.9047             | 0.1941          |
|                     | -0.0037          | 0.5371        | 0.8942             |                 |
|                     | 0.0056           | 0.6026        | 0.9152             |                 |
| <b>RF: 100, 1</b>   | -0.0395          | 1.2045        | 0.9127             | 0.0494          |
|                     | -0.0619          | 0.9521        | 0.9015             |                 |
|                     | -0.0171          | 1.4570        | 0.9239             |                 |



|  |                          |                |               |               |               |
|--|--------------------------|----------------|---------------|---------------|---------------|
|  | <b>RF: 100, 5</b>        | -0.0076        | 0.6063        | 0.9309        | 0.1598        |
|  |                          | -0.0212        | 0.5282        | 0.9213        |               |
|  |                          | 0.0060         | 0.6844        | 0.9406        |               |
|  | <b>RF: 100, 10</b>       | -0.0078        | 0.5851        | 0.9304        | 0.1770        |
|  |                          | -0.0257        | 0.4934        | 0.9204        |               |
|  |                          | 0.0101         | 0.6768        | 0.9403        |               |
|  | <b>RF: 300, 1</b>        | -0.0378        | 1.1752        | 0.9154        | 0.0379        |
|  |                          | -0.0633        | 0.8938        | 0.9043        |               |
|  |                          | -0.0124        | 1.4566        | 0.9264        |               |
|  | <b>RF: 300, 5</b>        | -0.0084        | 0.6177        | 0.9314        | 0.1509        |
|  |                          | -0.0241        | 0.5266        | 0.9216        |               |
|  |                          | 0.0074         | 0.7088        | 0.9411        |               |
|  | <b>RF: 300, 10</b>       | -0.0078        | 0.5867        | 0.9309        | 0.1756        |
|  |                          | -0.0233        | 0.5065        | 0.9212        |               |
|  |                          | 0.0078         | 0.6669        | 0.9406        |               |
|  | <i><b>RF: 500, 1</b></i> | <i>-0.0377</i> | <i>1.1735</i> | <i>0.9148</i> | <i>0.0374</i> |
|  |                          | <i>-0.0625</i> | <i>0.8969</i> | <i>0.9038</i> |               |
|  |                          | <i>-0.0129</i> | <i>1.4501</i> | <i>0.9258</i> |               |
|  | <b>RF: 500, 5</b>        | -0.0077        | 0.6221        | 0.9318        | 0.1475        |
|  |                          | -0.0222        | 0.5329        | 0.9222        |               |
|  |                          | 0.0068         | 0.7112        | 0.9415        |               |
|  | <b>RF: 500, 10</b>       | -0.0066        | 0.5851        | 0.9308        | 0.1769        |
|  |                          | -0.0209        | 0.5060        | 0.9212        |               |
|  |                          | 0.0078         | 0.6641        | 0.9403        |               |

**Supplementary Table L:** *External validation results from models including demographic, ACC variables, and AHEI. Criteria is equal to  $(\text{slope}-1)^2 + (\text{C-statistic}-1)^2$ . Best performing GBM and RF are italicized.*

|                            | <b>Intercept</b> | <b>Slope</b>  | <b>C-Statistic</b> | <b>Criteria</b> |
|----------------------------|------------------|---------------|--------------------|-----------------|
|                            | <b>95% CI</b>    | <b>95% CI</b> | <b>95% CI</b>      |                 |
| <b>Cox</b>                 | -0.0009          | 0.5347        | 0.8784             | 0.2313          |
|                            | -0.0041          | 0.5115        | 0.8671             |                 |
|                            | 0.0023           | 0.5579        | 0.8897             |                 |
| <b>GBM: 100, 1</b>         | -0.0009          | 0.5326        | 0.8839             | 0.2319          |
|                            | -0.0106          | 0.4627        | 0.8728             |                 |
|                            | 0.0088           | 0.6025        | 0.8951             |                 |
| <b>GBM: 100, 5</b>         | 0.0005           | 0.5312        | 0.8964             | 0.2305          |
|                            | -0.0052          | 0.4924        | 0.8857             |                 |
|                            | 0.0061           | 0.5700        | 0.9071             |                 |
| <i><b>GBM: 100, 10</b></i> | <i>0.0009</i>    | <i>0.5697</i> | <i>0.9025</i>      | <i>0.1947</i>   |
|                            | <i>-0.0044</i>   | <i>0.5315</i> | <i>0.8917</i>      |                 |
|                            | <i>0.0063</i>    | <i>0.6079</i> | <i>0.9133</i>      |                 |
| <b>GBM: 300, 1</b>         | 0.0001           | 0.5197        | 0.8852             | 0.2439          |
|                            | -0.0088          | 0.4561        | 0.8741             |                 |

|  |                     |         |        |        |        |
|--|---------------------|---------|--------|--------|--------|
|  |                     | 0.0089  | 0.5833 | 0.8963 |        |
|  | <b>GBM: 300, 5</b>  | 0.0002  | 0.5223 | 0.8957 | 0.2391 |
|  |                     | -0.0092 | 0.4583 | 0.8852 |        |
|  |                     | 0.0097  | 0.5864 | 0.9062 |        |
|  | <b>GBM: 300, 10</b> | 0.0030  | 0.5638 | 0.9061 | 0.1991 |
|  |                     | -0.0034 | 0.5179 | 0.8954 |        |
|  |                     | 0.0095  | 0.6096 | 0.9168 |        |
|  | <b>GBM: 500, 1</b>  | -0.0004 | 0.5284 | 0.8848 | 0.2357 |
|  |                     | -0.0097 | 0.4612 | 0.8737 |        |
|  |                     | 0.0090  | 0.5955 | 0.8960 |        |
|  | <b>GBM: 500, 5</b>  | 0.0018  | 0.5348 | 0.8942 | 0.2276 |
|  |                     | -0.0063 | 0.4780 | 0.8836 |        |
|  |                     | 0.0098  | 0.5916 | 0.9047 |        |
|  | <b>GBM: 500, 10</b> | 0.0011  | 0.5511 | 0.9054 | 0.2105 |
|  |                     | -0.0038 | 0.5176 | 0.8948 |        |
|  |                     | 0.0060  | 0.5846 | 0.9161 |        |
|  | <b>RF: 100, 1</b>   | -0.0416 | 1.2373 | 0.9141 | 0.0637 |
|  |                     | -0.0695 | 0.9188 | 0.9028 |        |
|  |                     | -0.0137 | 1.5558 | 0.9255 |        |
|  | <b>RF: 100, 5</b>   | -0.0081 | 0.6211 | 0.9296 | 0.1485 |
|  |                     | -0.0243 | 0.5268 | 0.9196 |        |
|  |                     | 0.0080  | 0.7154 | 0.9395 |        |
|  | <b>RF: 100, 10</b>  | -0.0064 | 0.5761 | 0.9288 | 0.1848 |
|  |                     | -0.0200 | 0.5061 | 0.9191 |        |
|  |                     | 0.0071  | 0.6460 | 0.9386 |        |
|  | <b>RF: 300, 1</b>   | -0.0372 | 1.1657 | 0.9147 | 0.0347 |
|  |                     | -0.0610 | 0.9034 | 0.9036 |        |
|  |                     | -0.0134 | 1.4281 | 0.9258 |        |
|  | <b>RF: 300, 5</b>   | -0.0066 | 0.6066 | 0.9309 | 0.1595 |
|  |                     | -0.0184 | 0.5344 | 0.9212 |        |
|  |                     | 0.0053  | 0.6788 | 0.9406 |        |
|  | <b>RF: 300, 10</b>  | -0.0067 | 0.5774 | 0.9299 | 0.1835 |
|  |                     | -0.0206 | 0.5058 | 0.9201 |        |
|  |                     | 0.0073  | 0.6491 | 0.9396 |        |
|  | <b>RF: 500, 1</b>   | -0.0429 | 1.2622 | 0.9137 | 0.0762 |
|  |                     | -0.0699 | 0.9513 | 0.9024 |        |
|  |                     | -0.0159 | 1.5731 | 0.9249 |        |
|  | <b>RF: 500, 5</b>   | -0.0074 | 0.6195 | 0.9307 | 0.1496 |
|  |                     | -0.0215 | 0.5326 | 0.9208 |        |
|  |                     | 0.0068  | 0.7063 | 0.9407 |        |
|  | <b>RF: 500, 10</b>  | -0.0055 | 0.5733 | 0.9295 | 0.1870 |
|  |                     | -0.0175 | 0.5070 | 0.9196 |        |
|  |                     | 0.0066  | 0.6396 | 0.9394 |        |

**Supplementary Table M:** *External validation results from models including demographic, ACC variables, and MDS. Criteria is equal to  $(\text{slope}-1)^2 + (\text{C-statistic}-1)^2$ . Best performing GBM and RF are italicized.*

|                     | <b>Intercept</b> | <b>Slope</b>  | <b>C-Statistic</b> | <b>Criteria</b> |
|---------------------|------------------|---------------|--------------------|-----------------|
|                     | <b>95% CI</b>    | <b>95% CI</b> | <b>95% CI</b>      |                 |
| <b>Cox</b>          | -0.0003          | 0.5268        | 0.8783             | 0.2387          |
|                     | -0.0037          | 0.5020        | 0.8670             |                 |
|                     | 0.0032           | 0.5516        | 0.8896             |                 |
| <b>GBM: 100, 1</b>  | -0.0009          | 0.5401        | 0.8860             | 0.2245          |
|                     | -0.0099          | 0.4738        | 0.8749             |                 |
|                     | 0.0081           | 0.6064        | 0.8972             |                 |
| <b>GBM: 100, 5</b>  | 0.0012           | 0.5358        | 0.8960             | 0.2263          |
|                     | -0.0047          | 0.4945        | 0.8846             |                 |
|                     | 0.0072           | 0.5770        | 0.9075             |                 |
| <b>GBM: 100, 10</b> | <i>0.0015</i>    | <i>0.5480</i> | <i>0.9043</i>      | <i>0.2135</i>   |
|                     | <i>-0.0064</i>   | <i>0.4927</i> | <i>0.8939</i>      |                 |
|                     | <i>0.0094</i>    | <i>0.6034</i> | <i>0.9147</i>      |                 |
| <b>GBM: 300, 1</b>  | -0.0005          | 0.5253        | 0.8853             | 0.2385          |
|                     | -0.0100          | 0.4578        | 0.8743             |                 |
|                     | 0.0090           | 0.5927        | 0.8963             |                 |
| <b>GBM: 300, 5</b>  | 0.0009           | 0.5382        | 0.8930             | 0.2247          |
|                     | -0.0066          | 0.4851        | 0.8823             |                 |
|                     | 0.0084           | 0.5914        | 0.9037             |                 |
| <b>GBM: 300, 10</b> | 0.0024           | 0.5390        | 0.9036             | 0.2218          |
|                     | -0.0053          | 0.4860        | 0.8931             |                 |
|                     | 0.0100           | 0.5919        | 0.9141             |                 |
| <b>GBM: 500, 1</b>  | -0.0003          | 0.5304        | 0.8856             | 0.2336          |
|                     | -0.0110          | 0.4526        | 0.8745             |                 |
|                     | 0.0103           | 0.6083        | 0.8966             |                 |
| <b>GBM: 500, 5</b>  | 0.0011           | 0.5551        | 0.8974             | 0.2085          |
|                     | -0.0067          | 0.4986        | 0.8867             |                 |
|                     | 0.0090           | 0.6116        | 0.9082             |                 |
| <b>GBM: 500, 10</b> | 0.0014           | 0.5220        | 0.9035             | 0.2378          |
|                     | -0.0056          | 0.4750        | 0.8931             |                 |
|                     | 0.0085           | 0.5690        | 0.9139             |                 |
| <b>RF: 100, 1</b>   | <i>-0.0345</i>   | <i>1.1250</i> | <i>0.9055</i>      | <i>0.0246</i>   |
|                     | <i>-0.0557</i>   | <i>0.8905</i> | <i>0.8941</i>      |                 |
|                     | <i>-0.0133</i>   | <i>1.3595</i> | <i>0.9168</i>      |                 |
| <b>RF: 100, 5</b>   | -0.0084          | 0.6085        | 0.9275             | 0.1585          |
|                     | -0.0232          | 0.5282        | 0.9178             |                 |
|                     | 0.0064           | 0.6887        | 0.9371             |                 |
| <b>RF: 100, 10</b>  | -0.0054          | 0.5666        | 0.9249             | 0.1935          |
|                     | -0.0171          | 0.5063        | 0.9148             |                 |
|                     | 0.0062           | 0.6269        | 0.9351             |                 |

|                    |         |        |        |        |
|--------------------|---------|--------|--------|--------|
| <b>RF: 300, 1</b>  | -0.0404 | 1.2231 | 0.9094 | 0.0580 |
|                    | -0.0659 | 0.9316 | 0.8981 |        |
|                    | -0.0150 | 1.5146 | 0.9207 |        |
| <b>RF: 300, 5</b>  | -0.0066 | 0.6099 | 0.9269 | 0.1575 |
|                    | -0.0190 | 0.5332 | 0.9168 |        |
|                    | 0.0058  | 0.6866 | 0.9371 |        |
| <b>RF: 300, 10</b> | -0.0064 | 0.5802 | 0.9254 | 0.1818 |
|                    | -0.0217 | 0.5000 | 0.9154 |        |
|                    | 0.0090  | 0.6605 | 0.9354 |        |
| <b>RF: 500, 1</b>  | -0.0388 | 1.1954 | 0.9094 | 0.0464 |
|                    | -0.0632 | 0.9179 | 0.8983 |        |
|                    | -0.0145 | 1.4728 | 0.9206 |        |
| <b>RF: 500, 5</b>  | -0.0060 | 0.6030 | 0.9275 | 0.1629 |
|                    | -0.0169 | 0.5352 | 0.9177 |        |
|                    | 0.0050  | 0.6708 | 0.9373 |        |
| <b>RF: 500, 10</b> | -0.0052 | 0.5782 | 0.9267 | 0.1833 |
|                    | -0.0171 | 0.5118 | 0.9169 |        |
|                    | 0.0066  | 0.6446 | 0.9364 |        |

**Supplementary Table N:** External validation results from models including demographic, ACC variables, and DASH. Criteria is equal to  $(\text{slope}-1)^2 + (\text{C-statistic}-1)^2$ . Best performing GBM and RF are italicized.

|                     | <b>Intercept</b> | <b>Slope</b>  | <b>C-Statistic</b> | <b>Criteria</b> |
|---------------------|------------------|---------------|--------------------|-----------------|
|                     | <b>95% CI</b>    | <b>95% CI</b> | <b>95% CI</b>      |                 |
| <b>Cox</b>          | -0.0001          | 0.5248        | 0.8775             | 0.2408          |
|                     | -0.0050          | 0.4892        | 0.8662             |                 |
|                     | 0.0048           | 0.5604        | 0.8888             |                 |
| <b>GBM: 100, 1</b>  | -0.0004          | 0.5277        | 0.8847             | 0.2364          |
|                     | -0.0099          | 0.4598        | 0.8735             |                 |
|                     | 0.0091           | 0.5956        | 0.8959             |                 |
| <b>GBM: 100, 5</b>  | 0.0008           | 0.5548        | 0.8959             | 0.2090          |
|                     | -0.0056          | 0.5080        | 0.8851             |                 |
|                     | 0.0073           | 0.6015        | 0.9067             |                 |
| <b>GBM: 100, 10</b> | <i>0.0002</i>    | <i>0.6169</i> | <i>0.9073</i>      | <i>0.1554</i>   |
|                     | <i>-0.0062</i>   | <i>0.5691</i> | <i>0.8970</i>      |                 |
|                     | <i>0.0066</i>    | <i>0.6647</i> | <i>0.9175</i>      |                 |
| <b>GBM: 300, 1</b>  | -0.0003          | 0.5352        | 0.8849             | 0.2293          |
|                     | -0.0109          | 0.4618        | 0.8737             |                 |
|                     | 0.0103           | 0.6085        | 0.8961             |                 |
| <b>GBM: 300, 5</b>  | 0.0010           | 0.5268        | 0.8925             | 0.2355          |
|                     | -0.0059          | 0.4785        | 0.8812             |                 |
|                     | 0.0080           | 0.5750        | 0.9037             |                 |
| <b>GBM: 300, 10</b> | 0.0022           | 0.5366        | 0.9015             | 0.2244          |
|                     | -0.0048          | 0.4889        | 0.8911             |                 |
|                     | 0.0092           | 0.5843        | 0.9120             |                 |

|  |                     |         |        |        |        |
|--|---------------------|---------|--------|--------|--------|
|  | <b>GBM: 500, 1</b>  | -0.0003 | 0.5276 | 0.8853 | 0.2363 |
|  |                     | -0.0101 | 0.4577 | 0.8742 |        |
|  |                     | 0.0094  | 0.5974 | 0.8964 |        |
|  | <b>GBM: 500, 5</b>  | 0.0006  | 0.5344 | 0.8963 | 0.2275 |
|  |                     | -0.0074 | 0.4796 | 0.8851 |        |
|  |                     | 0.0085  | 0.5892 | 0.9074 |        |
|  | <b>GBM: 500, 10</b> | 0.0003  | 0.5544 | 0.8973 | 0.2091 |
|  |                     | -0.0034 | 0.5286 | 0.8860 |        |
|  |                     | 0.0039  | 0.5803 | 0.9086 |        |
|  | <b>RF: 100, 1</b>   | -0.0410 | 1.2346 | 0.9079 | 0.0635 |
|  |                     | -0.0659 | 0.9484 | 0.8963 |        |
|  |                     | -0.0162 | 1.5207 | 0.9195 |        |
|  | <b>RF: 100, 5</b>   | -0.0066 | 0.5966 | 0.9281 | 0.1679 |
|  |                     | -0.0186 | 0.5278 | 0.9182 |        |
|  |                     | 0.0053  | 0.6654 | 0.9381 |        |
|  | <b>RF: 100, 10</b>  | -0.0060 | 0.5671 | 0.9274 | 0.1927 |
|  |                     | -0.0201 | 0.4952 | 0.9173 |        |
|  |                     | 0.0080  | 0.6390 | 0.9375 |        |
|  | <b>RF: 300, 1</b>   | -0.0393 | 1.2049 | 0.9104 | 0.0500 |
|  |                     | -0.0636 | 0.9279 | 0.8988 |        |
|  |                     | -0.0149 | 1.4819 | 0.9219 |        |
|  | <b>RF: 300, 5</b>   | -0.0062 | 0.6025 | 0.9289 | 0.1631 |
|  |                     | -0.0178 | 0.5313 | 0.9189 |        |
|  |                     | 0.0054  | 0.6738 | 0.9389 |        |
|  | <b>RF: 300, 10</b>  | -0.0070 | 0.5789 | 0.9279 | 0.1825 |
|  |                     | -0.0214 | 0.5044 | 0.9179 |        |
|  |                     | 0.0074  | 0.6533 | 0.9379 |        |
|  | <b>RF: 500, 1</b>   | -0.0369 | 1.1604 | 0.9114 | 0.0336 |
|  |                     | -0.0597 | 0.9083 | 0.9000 |        |
|  |                     | -0.0142 | 1.4124 | 0.9227 |        |
|  | <b>RF: 500, 5</b>   | -0.0053 | 0.5905 | 0.9300 | 0.1726 |
|  |                     | -0.0142 | 0.5364 | 0.9205 |        |
|  |                     | 0.0035  | 0.6446 | 0.9396 |        |
|  | <b>RF: 500, 10</b>  | -0.0057 | 0.5756 | 0.9284 | 0.1852 |
|  |                     | -0.0181 | 0.5073 | 0.9185 |        |
|  |                     | 0.0067  | 0.6440 | 0.9383 |        |

**Supplementary Table O:** External validation results from models including demographic, ACC variables, and nutrition variables. Criteria is equal to  $(\text{slope}-1)^2 + (\text{C-statistic}-1)^2$ . Best performing GBM and RF are italicized.

|  | <b>Intercept</b> | <b>Slope</b>  | <b>C-Statistic</b> | <b>Criteria</b> |
|--|------------------|---------------|--------------------|-----------------|
|  | <b>95% CI</b>    | <b>95% CI</b> | <b>95% CI</b>      |                 |

|                     |         |        |        |        |
|---------------------|---------|--------|--------|--------|
| <b>Cox</b>          | 0.0010  | 0.4611 | 0.8830 | 0.3041 |
|                     | -0.0034 | 0.4264 | 0.8698 |        |
|                     | 0.0054  | 0.4959 | 0.8962 |        |
| <b>GBM: 100, 1</b>  | -0.0030 | 0.5674 | 0.8896 | 0.1993 |
|                     | -0.0092 | 0.5227 | 0.8784 |        |
|                     | 0.0031  | 0.6120 | 0.9007 |        |
| <b>GBM: 100, 5</b>  | -0.0016 | 0.5621 | 0.9072 | 0.2004 |
|                     | -0.0073 | 0.5227 | 0.8966 |        |
|                     | 0.0041  | 0.6015 | 0.9178 |        |
| <b>GBM: 100, 10</b> | 0.0027  | 0.6518 | 0.9090 | 0.1295 |
|                     | -0.0049 | 0.5906 | 0.8981 |        |
|                     | 0.0103  | 0.7131 | 0.9200 |        |
| <b>GBM: 300, 1</b>  | -0.0026 | 0.5681 | 0.8886 | 0.1989 |
|                     | -0.0103 | 0.5108 | 0.8772 |        |
|                     | 0.0051  | 0.6254 | 0.9000 |        |
| <b>GBM: 300, 5</b>  | -0.0009 | 0.6548 | 0.9022 | 0.1287 |
|                     | -0.0062 | 0.6121 | 0.8902 |        |
|                     | 0.0044  | 0.6975 | 0.9143 |        |
| <b>GBM: 300, 10</b> | 0.0021  | 0.8318 | 0.9058 | 0.0372 |
|                     | -0.0039 | 0.7710 | 0.8947 |        |
|                     | 0.0081  | 0.8927 | 0.9170 |        |
| <b>GBM: 500, 1</b>  | -0.0026 | 0.5545 | 0.8894 | 0.2107 |
|                     | -0.0101 | 0.5000 | 0.8781 |        |
|                     | 0.0050  | 0.6090 | 0.9008 |        |
| <b>GBM: 500, 5</b>  | -0.0029 | 0.5980 | 0.9030 | 0.1710 |
|                     | -0.0060 | 0.5759 | 0.8912 |        |
|                     | 0.0002  | 0.6202 | 0.9148 |        |
| <b>GBM: 500, 10</b> | 0.0003  | 0.7133 | 0.9098 | 0.0903 |
|                     | -0.0057 | 0.6624 | 0.8990 |        |
|                     | 0.0063  | 0.7642 | 0.9206 |        |
| <b>RF: 100, 1</b>   | -0.1254 | 2.5742 | 0.8937 | 2.4894 |
|                     | -0.1941 | 1.5825 | 0.8781 |        |
|                     | -0.0567 | 3.5659 | 0.9093 |        |
| <b>RF: 100, 5</b>   | -0.0299 | 1.0137 | 0.9320 | 0.0048 |
|                     | -0.0567 | 0.7609 | 0.9208 |        |
|                     | -0.0031 | 1.2666 | 0.9433 |        |
| <b>RF: 100, 10</b>  | -0.0201 | 0.8447 | 0.9336 | 0.0285 |
|                     | -0.0412 | 0.6690 | 0.9226 |        |
|                     | 0.0010  | 1.0204 | 0.9445 |        |
| <b>RF: 300, 1</b>   | -0.1293 | 2.6387 | 0.9059 | 2.6942 |
|                     | -0.1973 | 1.6579 | 0.8914 |        |
|                     | -0.0613 | 3.6195 | 0.9203 |        |
| <b>RF: 300, 5</b>   | -0.0314 | 1.0368 | 0.9371 | 0.0053 |
|                     | -0.0583 | 0.7826 | 0.9262 |        |
|                     | -0.0046 | 1.2909 | 0.9481 |        |

|  |                    |         |        |        |        |
|--|--------------------|---------|--------|--------|--------|
|  | <b>RF: 300, 10</b> | -0.0204 | 0.8343 | 0.9367 | 0.0315 |
|  |                    | -0.0395 | 0.6773 | 0.9263 |        |
|  |                    | -0.0012 | 0.9913 | 0.9470 |        |
|  | <b>RF: 500, 1</b>  | -0.1401 | 2.8162 | 0.9129 | 3.3062 |
|  |                    | -0.2170 | 1.6982 | 0.8993 |        |
|  |                    | -0.0632 | 3.9342 | 0.9266 |        |
|  | <b>RF: 500, 5</b>  | -0.0304 | 1.0242 | 0.9348 | 0.0048 |
|  |                    | -0.0552 | 0.7896 | 0.9238 |        |
|  |                    | -0.0057 | 1.2588 | 0.9459 |        |
|  | <b>RF: 500, 10</b> | -0.0215 | 0.8494 | 0.9379 | 0.0265 |
|  |                    | -0.0419 | 0.6824 | 0.9277 |        |
|  |                    | -0.0012 | 1.0165 | 0.9481 |        |

**Supplementary Table P:** Hazard ratios (95% CIs) from Cox models developed on training data. See Supplementary Table A for variable definitions.

|             | <b>Model 1<br/>(ACC)</b> | <b>Model 2<br/>(+HEI)</b> | <b>Model 3<br/>(+AHEI)</b> | <b>Model 4<br/>(+MDS)</b> | <b>Model 5<br/>(+DASH)</b> | <b>Model 6<br/>(+All)</b> |
|-------------|--------------------------|---------------------------|----------------------------|---------------------------|----------------------------|---------------------------|
| age         | 1.10 (1.09, 1.10)        | 1.10 (1.09, 1.11)         | 1.10 (1.09, 1.11)          | 1.10 (1.09, 1.10)         | 1.10 (1.09, 1.11)          | 1.10 (1.09, 1.10)         |
| sex         | 0.65 (0.57, 0.73)        | 0.65 (0.58, 0.74)         | 0.65 (0.58, 0.73)          | 0.65 (0.57, 0.73)         | 0.65 (0.58, 0.74)          | 0.61 (0.54, 0.70)         |
| black       | 1.14 (0.99, 1.32)        | 1.14 (0.99, 1.32)         | 1.15 (0.99, 1.33)          | 1.14 (0.99, 1.32)         | 1.11 (0.97, 1.29)          | 1.10 (0.99, 1.29)         |
| hispanic    | 0.69 (0.58, 0.81)        | 0.69 (0.58, 0.82)         | 0.69 (0.58, 0.82)          | 0.69 (0.58, 0.82)         | 0.70 (0.59, 0.83)          | 0.64 (0.58, 0.77)         |
| total_chol  | 1.00 (1.00, 1.00)        | 1.00 (1.00, 1.00)         | 1.00 (1.00, 1.00)          | 1.00 (1.00, 1.00)         | 1.00 (1.00, 1.00)          | 1.00 (1.00, 1.00)         |
| hdl         | 1.00 (1.00, 1.00)        | 1.00 (1.00, 1.00)         | 1.00 (1.00, 1.00)          | 1.00 (1.00, 1.00)         | 1.00 (1.00, 1.01)          | 1.00 (1.00, 1.00)         |
| sbp         | 1.00 (1.00, 1.01)        | 1.00 (1.00, 1.01)         | 1.00 (1.00, 1.01)          | 1.00 (1.00, 1.01)         | 1.01 (1.00, 1.01)          | 1.00 (1.00, 1.01)         |
| bpmeds      | 1.19 (1.08, 1.30)        | 1.19 (1.09, 1.30)         | 1.19 (1.09, 1.30)          | 1.19 (1.09, 1.31)         | 1.18 (1.07, 1.29)          | 1.21 (1.09, 1.33)         |
| dm          | 1.46 (1.29, 1.65)        | 1.46 (1.29, 1.65)         | 1.45 (1.29, 1.64)          | 1.46 (1.29, 1.65)         | 1.45 (1.28, 1.63)          | 1.40 (1.29, 1.59)         |
| tob         | 1.91 (1.61, 2.27)        | 1.89 (1.59, 2.25)         | 1.88 (1.59, 2.23)          | 1.91 (1.61, 2.26)         | 1.84 (1.55, 2.18)          | 1.84 (1.59, 2.19)         |
| hei         |                          | 1.00 (0.99, 1.01)         |                            |                           |                            |                           |
| ahei        |                          |                           | 1.00 (0.99, 1.00)          |                           |                            |                           |
| mhs         |                          |                           |                            | 1.05 (1.00, 1.10)         |                            |                           |
| dash        |                          |                           |                            |                           | 0.99 (0.98, 0.99)          |                           |
| milk_g      |                          |                           |                            |                           |                            | 1 (1, 1)                  |
| cream_g     |                          |                           |                            |                           |                            | 1 (0.99, 1)               |
| milk_desse  |                          |                           |                            |                           |                            | 1 (1, 1)                  |
| rt_g        |                          |                           |                            |                           |                            |                           |
| cheese_g    |                          |                           |                            |                           |                            | 1 (1, 1)                  |
| meat_ns_g   |                          |                           |                            |                           |                            | 1 (0.99, 1.01)            |
| beef_g      |                          |                           |                            |                           |                            | 1 (1, 1)                  |
| pork_g      |                          |                           |                            |                           |                            | 1 (1, 1)                  |
| lamb_g      |                          |                           |                            |                           |                            | 1 (1, 1)                  |
| poultry_g   |                          |                           |                            |                           |                            | 1 (1, 1)                  |
| organ_mea   |                          |                           |                            |                           |                            | 1 (1, 1)                  |
| t_g         |                          |                           |                            |                           |                            |                           |
| fish_g      |                          |                           |                            |                           |                            | 1 (0.99, 1)               |
| meat_nonm   |                          |                           |                            |                           |                            | 1 (1, 1)                  |
| eat_g       |                          |                           |                            |                           |                            |                           |
| protein_fro |                          |                           |                            |                           |                            | 1 (1, 1)                  |
| zen_g       |                          |                           |                            |                           |                            |                           |
| eggs_g      |                          |                           |                            |                           |                            | 1 (1, 1)                  |
| egg_mixtur  |                          |                           |                            |                           |                            | 1 (1, 1)                  |
| e_g         |                          |                           |                            |                           |                            |                           |
| egg_sub_g   |                          |                           |                            |                           |                            | 0.99 (0.99, 1)            |
| legumes_g   |                          |                           |                            |                           |                            | 1 (1, 1)                  |
| nuts_g      |                          |                           |                            |                           |                            | 1 (1, 1)                  |
| seeds_g     |                          |                           |                            |                           |                            | 1 (0.99, 1.01)            |
| flour_mix_  |                          |                           |                            |                           |                            | 0.22 (0, ∞)               |
| g           |                          |                           |                            |                           |                            |                           |
| bread_yeas  |                          |                           |                            |                           |                            | 1 (1, 1)                  |
| t_g         |                          |                           |                            |                           |                            |                           |
| bread_quic  |                          |                           |                            |                           |                            | 1 (1, 1)                  |
| k_g         |                          |                           |                            |                           |                            |                           |
| pastries_g  |                          |                           |                            |                           |                            | 1 (1, 1)                  |
| crackers_g  |                          |                           |                            |                           |                            | 1 (1, 1)                  |

|                    | Model 1<br>(ACC) | Model 2<br>(+HEI) | Model 3<br>(+AHEI) | Model 4<br>(+MDS) | Model 5<br>(+DASH) | Model 6<br>(+All) |
|--------------------|------------------|-------------------|--------------------|-------------------|--------------------|-------------------|
| pancakes_g         |                  |                   |                    |                   |                    | 1 (1, 1)          |
| pastas_g           |                  |                   |                    |                   |                    | 1 (1, 1)          |
| cereals_g          |                  |                   |                    |                   |                    | 1 (1, 1)          |
| grain_mix_g        |                  |                   |                    |                   |                    | 1 (1, 1)          |
| meat_sub_g         |                  |                   |                    |                   |                    | 0.78 (0, ∞)       |
| citrus_g           |                  |                   |                    |                   |                    | 1 (1, 1)          |
| fruit_dried_g      |                  |                   |                    |                   |                    | 1 (1, 1.01)       |
| fruit_other_g      |                  |                   |                    |                   |                    | 1 (1, 1)          |
| fruit_juice_g      |                  |                   |                    |                   |                    | 1 (1, 1)          |
| fruit_baby_g       |                  |                   |                    |                   |                    | 0.84 (0, ∞)       |
| potatoes_g         |                  |                   |                    |                   |                    | 1 (1, 1)          |
| veg_darkgreen_g    |                  |                   |                    |                   |                    | 1 (1, 1)          |
| veg_deepyellow_g   |                  |                   |                    |                   |                    | 1 (1, 1.01)       |
| tomatoes_g         |                  |                   |                    |                   |                    | 1 (1, 1)          |
| veg_other_g        |                  |                   |                    |                   |                    | 1 (1, 1)          |
| veg_meat_g         |                  |                   |                    |                   |                    | 1 (1, 1)          |
| veg_mixture_g      |                  |                   |                    |                   |                    | 1 (1, 1)          |
| fats_g             |                  |                   |                    |                   |                    | 1 (1, 1.01)       |
| oils_g             |                  |                   |                    |                   |                    | 1 (0.98, 1.01)    |
| salad_dressing_g   |                  |                   |                    |                   |                    | 1 (1, 1.01)       |
| sweets_g           |                  |                   |                    |                   |                    | 1 (1, 1)          |
| bev_nonalcoholic_g |                  |                   |                    |                   |                    | 1 (1, 1)          |
| bev_alcohol_g      |                  |                   |                    |                   |                    | 1 (1, 1)          |
| water_g            |                  |                   |                    |                   |                    | 1 (1, 1)          |
| kcal               |                  |                   |                    |                   |                    | 1 (1, 1)          |
| protein_g          |                  |                   |                    |                   |                    | 1.01 (1, 1.02)    |
| carb_g             |                  |                   |                    |                   |                    | 1 (1, 1.01)       |
| fiber_g            |                  |                   |                    |                   |                    | 0.96 (0.95, 0.97) |
| fat_g              |                  |                   |                    |                   |                    | 0.99 (0.97, 1.01) |
| fat_sat_g          |                  |                   |                    |                   |                    | 1.19 (1.07, 1.32) |
| fat_mono_g         |                  |                   |                    |                   |                    | 0.96 (0.93, 1)    |
| fat_poly_g         |                  |                   |                    |                   |                    | 0.97 (0.94, 0.99) |
| cholesterol_mg     |                  |                   |                    |                   |                    | 1 (1, 1)          |
| vite_mg            |                  |                   |                    |                   |                    | 0.99 (0.98, 1.01) |
| vita_mg            |                  |                   |                    |                   |                    | 1 (1, 1)          |
| betacarotene_mcg   |                  |                   |                    |                   |                    | 1 (1, 1)          |
| vitb1_mg           |                  |                   |                    |                   |                    | 0.92 (0.78, 1.10) |
| vitb2_mg           |                  |                   |                    |                   |                    | 1.02 (0.87, 1.19) |
| niacin_mg          |                  |                   |                    |                   |                    | 0.98 (0.96, 0.99) |
| vitb6_mg           |                  |                   |                    |                   |                    | 1.11 (0.98, 1.25) |
| folate_mcg         |                  |                   |                    |                   |                    | 1 (1, 1)          |
| vitb12_mcg         |                  |                   |                    |                   |                    | 1 (0.99, 1.02)    |
| vitc_mg            |                  |                   |                    |                   |                    | 1 (1, 1)          |
| calcium_mg         |                  |                   |                    |                   |                    | 1 (1, 1)          |
| phosphorus_mg      |                  |                   |                    |                   |                    | 1 (1, 1)          |
| magnesium_mg       |                  |                   |                    |                   |                    | 1 (1, 1)          |
| iron_mg            |                  |                   |                    |                   |                    | 1.01 (1, 1.03)    |
| zinc_mg            |                  |                   |                    |                   |                    | 1.01 (1, 1.01)    |
| copper_mg          |                  |                   |                    |                   |                    | 0.93 (0.84, 1.03) |
| sodium_mg          |                  |                   |                    |                   |                    | 1 (1, 1)          |
| potassium_mg       |                  |                   |                    |                   |                    | 1 (1, 1)          |
| selenium_mcg       |                  |                   |                    |                   |                    | 1 (0.99, 1)       |
| caffeine_mg        |                  |                   |                    |                   |                    | 1 (1, 1)          |



|             | Model 1<br>(ACC) | Model 2<br>(+HEI) | Model 3<br>(+AHEI) | Model 4<br>(+MDS) | Model 5<br>(+DASH) | Model 6<br>(+All)   |
|-------------|------------------|-------------------|--------------------|-------------------|--------------------|---------------------|
| theobromin  |                  |                   |                    |                   |                    | 1 (1, 1)            |
| e_mg        |                  |                   |                    |                   |                    |                     |
| alcohol_gm  |                  |                   |                    |                   |                    | 1.01 (1, 1.01)      |
| sfa_40_gm   |                  |                   |                    |                   |                    | 1.31 (0.69, 2.47)   |
| sfa_60_gm   |                  |                   |                    |                   |                    | 0.67 (0.24, 1.81)   |
| sfa_80_gm   |                  |                   |                    |                   |                    | 1.17 (0.53, 2.60)   |
| sfa_100_gm  |                  |                   |                    |                   |                    | 0.67 (0.22, 2.05)   |
| sfa_120_gm  |                  |                   |                    |                   |                    | 0.88 (0.77, 1.01)   |
| sfa_140_gm  |                  |                   |                    |                   |                    | 0.76 (0.57, 1.01)   |
| sfa_160_gm  |                  |                   |                    |                   |                    | 0.85 (0.76, 0.94)   |
| sfa_180_gm  |                  |                   |                    |                   |                    | 0.86 (0.75, 0.98)   |
| mfa_161h_gm |                  |                   |                    |                   |                    | 0.85 (0.66, 1.09)   |
| mfa_161o_gm |                  |                   |                    |                   |                    | 1.06 (1.02, 1.10)   |
| mfa_201_gm  |                  |                   |                    |                   |                    | 1.32 (1.03, 1.69)   |
| mfa_221_gm  |                  |                   |                    |                   |                    | 0.34 (0.13, 0.90)   |
| pfa_182_gm  |                  |                   |                    |                   |                    | 1.07 (1.04, 1.11)   |
| pfa_183_gm  |                  |                   |                    |                   |                    | 0.80 (0.68, 0.95)   |
| pfa_184_gm  |                  |                   |                    |                   |                    | 5.67 (0.15, 211.03) |
| pfa_204_gm  |                  |                   |                    |                   |                    | 1.02 (0.29, 3.64)   |
| pfa_205_gm  |                  |                   |                    |                   |                    | 0.99 (0.21, 4.69)   |
| pfa_225_gm  |                  |                   |                    |                   |                    | 0.63 (0.01, 55.24)  |
| pfa_226_gm  |                  |                   |                    |                   |                    | 1.45 (0.40, 5.24)   |
| water_yest  |                  |                   |                    |                   |                    | 1 (1, 1)            |
| erday_gm    |                  |                   |                    |                   |                    |                     |

**Supplementary Table Q:** Relative influences of variables in best performing GBM models in training set from each modeling approach. See Supplementary Table A for variable definitions.

|                | Model 1<br>(ACC) | Model 2<br>(+HEI) | Model 3<br>(+AHEI) | Model 4<br>(+MDS) | Model 5<br>(+DASH) | Model 6<br>(+All) |
|----------------|------------------|-------------------|--------------------|-------------------|--------------------|-------------------|
| age            | 19.89            | 30.33             | 5.59               | 2.93              | 29.70              | 19.25             |
| sex            | 2.26             | 1.81              | 0.28               | 0.50              | 1.43               | 0.17              |
| black          | 2.13             | 0.61              | 0.02               | 0.02              | 0.70               | 0.01              |
| hispanic       | 0.98             | 0.68              | 0.05               | 0.02              | 0.71               | 0.01              |
| total_chol     | 23.61            | 15.16             | 17.43              | 16.56             | 13.43              | 2.14              |
| hdl            | 18.18            | 11.00             | 2.62               | 36.47             | 12.00              | 2.80              |
| sbp            | 24.06            | 20.79             | 23.02              | 41.44             | 19.09              | 2.56              |
| bpmeds         | 3.47             | 3.11              | 3.11               | 0.12              | 3.94               | 0.49              |
| dm             | 2.08             | 1.53              | 0.12               | 0.05              | 1.64               | 0.27              |
| tob            | 3.32             | 0.68              | 45.83              | 0.26              | 0.81               | 0.02              |
| hei            |                  | 14.30             |                    |                   |                    |                   |
| ahei           |                  |                   | 1.92               |                   |                    |                   |
| mhs            |                  |                   |                    | 1.63              |                    |                   |
| dash           |                  |                   |                    |                   | 16.54              |                   |
| iron_mg        |                  |                   |                    |                   |                    | 10.86             |
| legumes_g      |                  |                   |                    |                   |                    | 8.42              |
| sweets_g       |                  |                   |                    |                   |                    | 6.55              |
| pastries_g     |                  |                   |                    |                   |                    | 5.75              |
| pork_g         |                  |                   |                    |                   |                    | 4.33              |
| vita_mg        |                  |                   |                    |                   |                    | 3.86              |
| sfa_80_gm      |                  |                   |                    |                   |                    | 2.99              |
| cholesterol_mg |                  |                   |                    |                   |                    | 1.95              |
| water_yest     |                  |                   |                    |                   |                    | 1.22              |
| erday_gm       |                  |                   |                    |                   |                    |                   |
| copper_mg      |                  |                   |                    |                   |                    | 1.00              |

|                    | Model 1<br>(ACC) | Model 2<br>(+HEI) | Model 3<br>(+AHEI) | Model 4<br>(+MDS) | Model 5<br>(+DASH) | Model 6<br>(+All) |
|--------------------|------------------|-------------------|--------------------|-------------------|--------------------|-------------------|
| fats_g             |                  |                   |                    |                   |                    | 0.97              |
| beef_g             |                  |                   |                    |                   |                    | 0.92              |
| vite_mg            |                  |                   |                    |                   |                    | 0.76              |
| bread_quic         |                  |                   |                    |                   |                    | 0.70              |
| k_g                |                  |                   |                    |                   |                    |                   |
| calcium_m          |                  |                   |                    |                   |                    | 0.67              |
| g                  |                  |                   |                    |                   |                    |                   |
| mfa_201_g          |                  |                   |                    |                   |                    | 0.66              |
| m                  |                  |                   |                    |                   |                    |                   |
| vitb12_mcg         |                  |                   |                    |                   |                    | 0.65              |
| sfa_140_g          |                  |                   |                    |                   |                    | 0.65              |
| m                  |                  |                   |                    |                   |                    |                   |
| betacaro_m         |                  |                   |                    |                   |                    | 0.61              |
| cg                 |                  |                   |                    |                   |                    |                   |
| mfa_161o_g         |                  |                   |                    |                   |                    | 0.56              |
| gm                 |                  |                   |                    |                   |                    |                   |
| carb_g             |                  |                   |                    |                   |                    | 0.54              |
| kcal               |                  |                   |                    |                   |                    | 0.51              |
| mfa_161h_g         |                  |                   |                    |                   |                    | 0.50              |
| gm                 |                  |                   |                    |                   |                    |                   |
| caffeine_m         |                  |                   |                    |                   |                    | 0.47              |
| g                  |                  |                   |                    |                   |                    |                   |
| veg_other_g        |                  |                   |                    |                   |                    | 0.46              |
| g                  |                  |                   |                    |                   |                    |                   |
| selenium_mcg       |                  |                   |                    |                   |                    | 0.45              |
| m                  |                  |                   |                    |                   |                    |                   |
| zinc_mg            |                  |                   |                    |                   |                    | 0.44              |
| vitb1_mg           |                  |                   |                    |                   |                    | 0.43              |
| pfa_183_g          |                  |                   |                    |                   |                    | 0.41              |
| m                  |                  |                   |                    |                   |                    |                   |
| sfa_180_g          |                  |                   |                    |                   |                    | 0.39              |
| m                  |                  |                   |                    |                   |                    |                   |
| sfa_120_g          |                  |                   |                    |                   |                    | 0.39              |
| m                  |                  |                   |                    |                   |                    |                   |
| magnesium_mg       |                  |                   |                    |                   |                    | 0.38              |
| alcohol_gm         |                  |                   |                    |                   |                    | 0.38              |
| nuts_g             |                  |                   |                    |                   |                    | 0.38              |
| vitc_mg            |                  |                   |                    |                   |                    | 0.37              |
| fiber_g            |                  |                   |                    |                   |                    | 0.37              |
| phosphorus_mg      |                  |                   |                    |                   |                    | 0.37              |
| fat_poly_g         |                  |                   |                    |                   |                    | 0.35              |
| potassium_mg       |                  |                   |                    |                   |                    | 0.35              |
| salad_dressing_g   |                  |                   |                    |                   |                    | 0.34              |
| vitb6_mg           |                  |                   |                    |                   |                    | 0.34              |
| fat_g              |                  |                   |                    |                   |                    | 0.33              |
| bev_nonalcoholic_g |                  |                   |                    |                   |                    | 0.33              |
| fruit_other_g      |                  |                   |                    |                   |                    | 0.32              |
| sodium_mg          |                  |                   |                    |                   |                    | 0.32              |
| pancakes_g         |                  |                   |                    |                   |                    | 0.31              |
| protein_g          |                  |                   |                    |                   |                    | 0.30              |
| pfa_205_g          |                  |                   |                    |                   |                    | 0.30              |
| m                  |                  |                   |                    |                   |                    |                   |
| poultry_g          |                  |                   |                    |                   |                    | 0.29              |
| sfa_160_g          |                  |                   |                    |                   |                    | 0.29              |
| m                  |                  |                   |                    |                   |                    |                   |
| pfa_182_g          |                  |                   |                    |                   |                    | 0.28              |
| milk_g             |                  |                   |                    |                   |                    | 0.28              |
| folate_mcg         |                  |                   |                    |                   |                    | 0.28              |
| fat_mono_g         |                  |                   |                    |                   |                    | 0.28              |
| cheese_g           |                  |                   |                    |                   |                    | 0.26              |
| milk_dessert_g     |                  |                   |                    |                   |                    | 0.26              |
| pfa_204_g          |                  |                   |                    |                   |                    | 0.26              |
| m                  |                  |                   |                    |                   |                    |                   |
| niacin_mg          |                  |                   |                    |                   |                    | 0.24              |
| theobromine_mg     |                  |                   |                    |                   |                    | 0.21              |
| pastas_g           |                  |                   |                    |                   |                    | 0.20              |

1  
2  
3  
4  
5  
6  
7  
8  
9  
10  
11  
12  
13  
14  
15  
16  
17  
18  
19  
20  
21  
22  
23  
24  
25  
26  
27  
28  
29  
30  
31  
32  
33  
34  
35  
36  
37  
38  
39  
40  
41  
42  
43  
44  
45  
46  
47  
48  
49  
50  
51  
52  
53  
54  
55  
56  
57  
58  
59  
60

|                  | Model 1<br>(ACC) | Model 2<br>(+HEI) | Model 3<br>(+AHEI) | Model 4<br>(+MDS) | Model 5<br>(+DASH) | Model 6<br>(+All) |
|------------------|------------------|-------------------|--------------------|-------------------|--------------------|-------------------|
| pfa_226_g        |                  |                   |                    |                   |                    | 0.20              |
| m                |                  |                   |                    |                   |                    |                   |
| veg_darkgr       |                  |                   |                    |                   |                    | 0.19              |
| een_g            |                  |                   |                    |                   |                    |                   |
| bev_alcohol_g    |                  |                   |                    |                   |                    | 0.19              |
| tomatoes_g       |                  |                   |                    |                   |                    | 0.18              |
| fat_sat_g        |                  |                   |                    |                   |                    | 0.16              |
| crackers_g       |                  |                   |                    |                   |                    | 0.16              |
| vitb2_mg         |                  |                   |                    |                   |                    | 0.16              |
| sfa_100_g        |                  |                   |                    |                   |                    | 0.15              |
| m                |                  |                   |                    |                   |                    |                   |
| sfa_60_gm        |                  |                   |                    |                   |                    | 0.14              |
| pfa_225_g        |                  |                   |                    |                   |                    | 0.14              |
| m                |                  |                   |                    |                   |                    |                   |
| mfa_221_g        |                  |                   |                    |                   |                    | 0.14              |
| m                |                  |                   |                    |                   |                    |                   |
| egg_mixture_g    |                  |                   |                    |                   |                    | 0.14              |
| fruit_juice_g    |                  |                   |                    |                   |                    | 0.14              |
| citrus_g         |                  |                   |                    |                   |                    | 0.12              |
| veg_deepyellow_g |                  |                   |                    |                   |                    | 0.12              |
| cream_g          |                  |                   |                    |                   |                    | 0.12              |
| organ_meat_g     |                  |                   |                    |                   |                    | 0.11              |
| potatoes_g       |                  |                   |                    |                   |                    | 0.11              |
| cereals_g        |                  |                   |                    |                   |                    | 0.10              |
| meat_nonmeat_g   |                  |                   |                    |                   |                    | 0.09              |
| eat_g            |                  |                   |                    |                   |                    |                   |
| seeds_g          |                  |                   |                    |                   |                    | 0.08              |
| water_g          |                  |                   |                    |                   |                    | 0.06              |
| fish_g           |                  |                   |                    |                   |                    | 0.06              |
| grain_mixture_g  |                  |                   |                    |                   |                    | 0.05              |
| lamb_g           |                  |                   |                    |                   |                    | 0.05              |
| pfa_184_g        |                  |                   |                    |                   |                    | 0.04              |
| m                |                  |                   |                    |                   |                    |                   |
| meat_ns_g        |                  |                   |                    |                   |                    | 0.03              |
| eggs_g           |                  |                   |                    |                   |                    | 0.03              |
| protein_frozen_g |                  |                   |                    |                   |                    | 0.02              |
| oils_g           |                  |                   |                    |                   |                    | 0.02              |
| fruit_dried_g    |                  |                   |                    |                   |                    | 0.02              |
| egg_sub_g        |                  |                   |                    |                   |                    | 0.01              |
| flour_mixture_g  |                  |                   |                    |                   |                    | 0.00              |
| meat_sub_g       |                  |                   |                    |                   |                    | 0.00              |
| fruit_baby_g     |                  |                   |                    |                   |                    | 0.00              |
| veg_meat_g       |                  |                   |                    |                   |                    | 0.00              |
| veg_mixture_g    |                  |                   |                    |                   |                    | 0.00              |

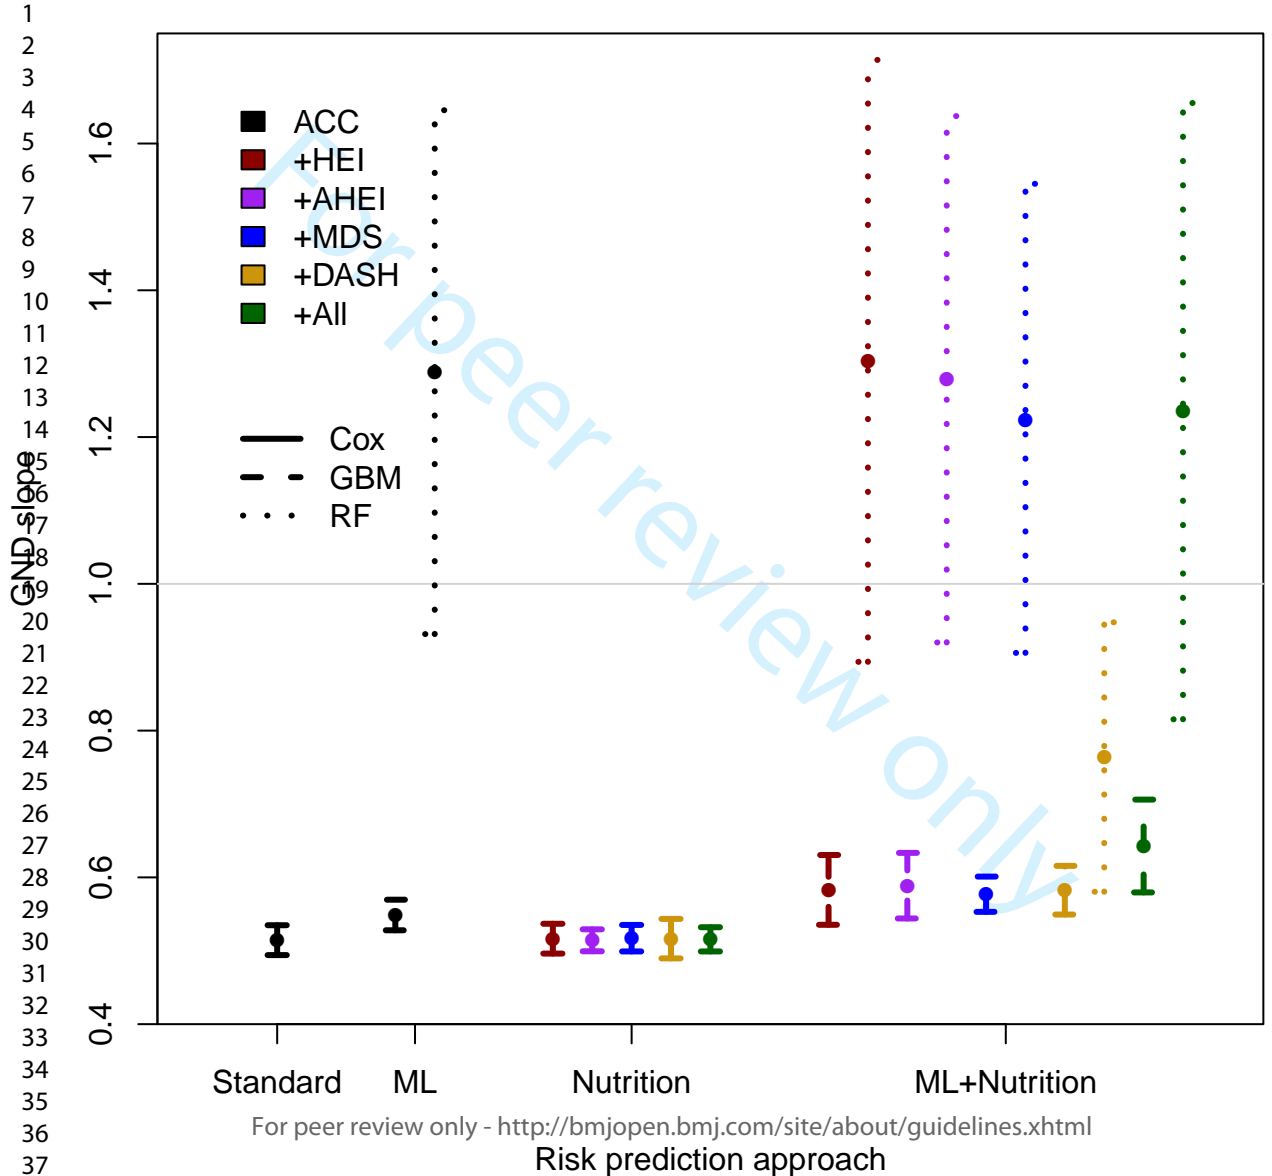

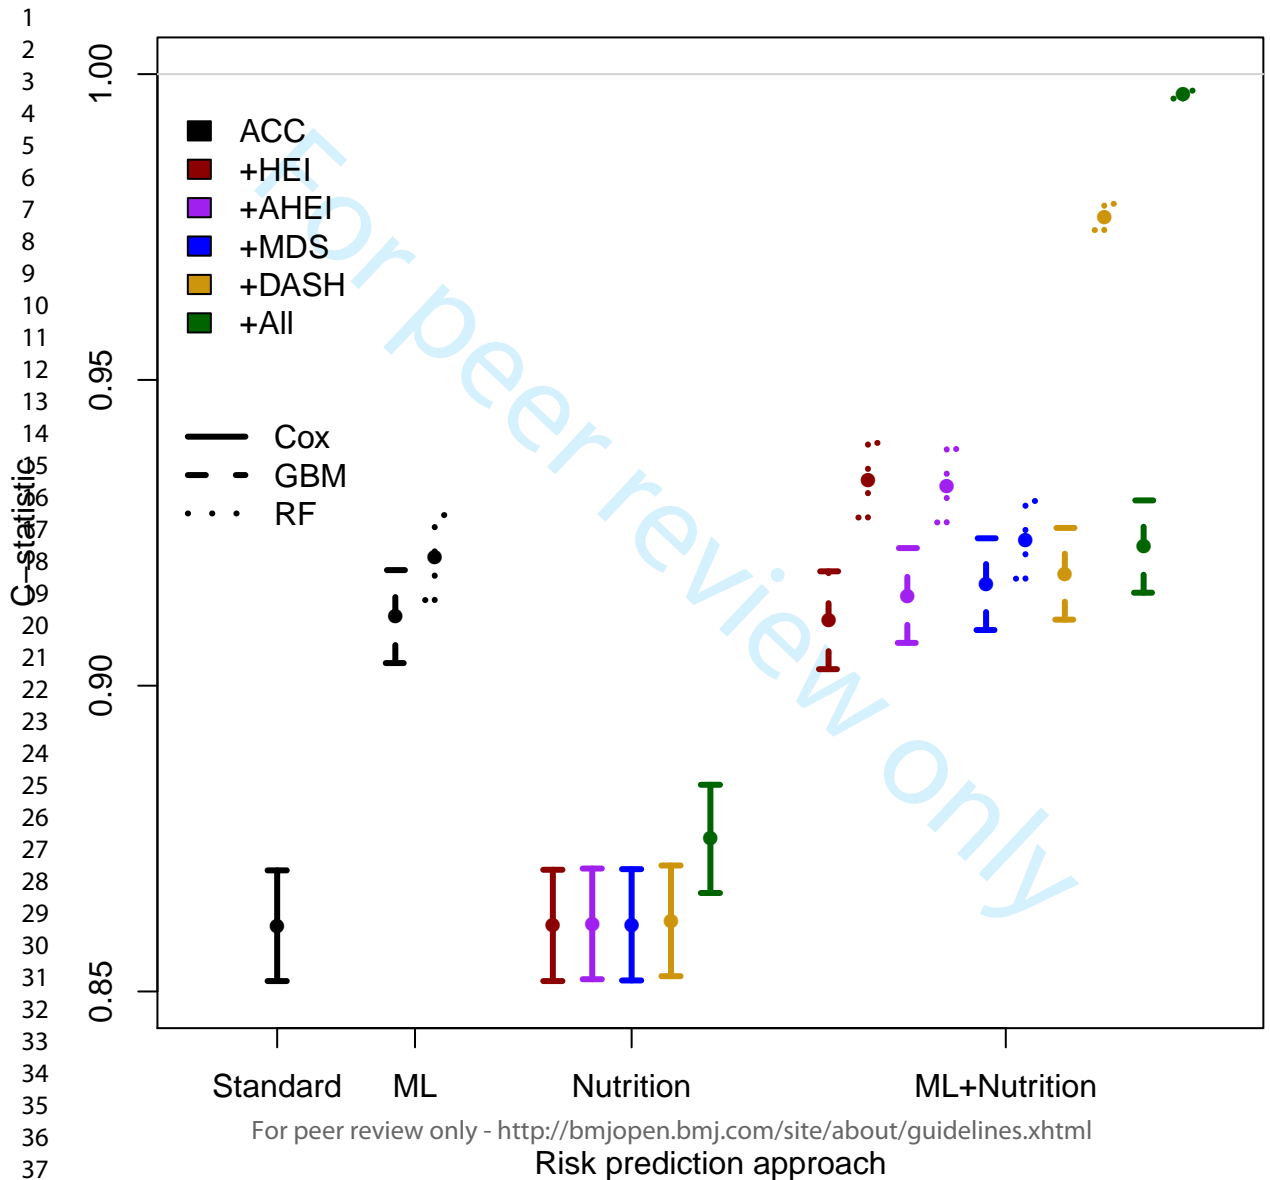

**(a)**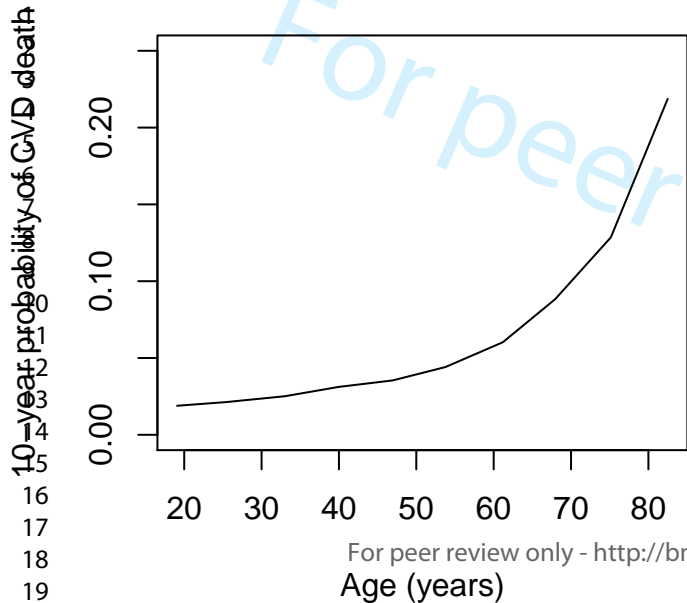**(b)**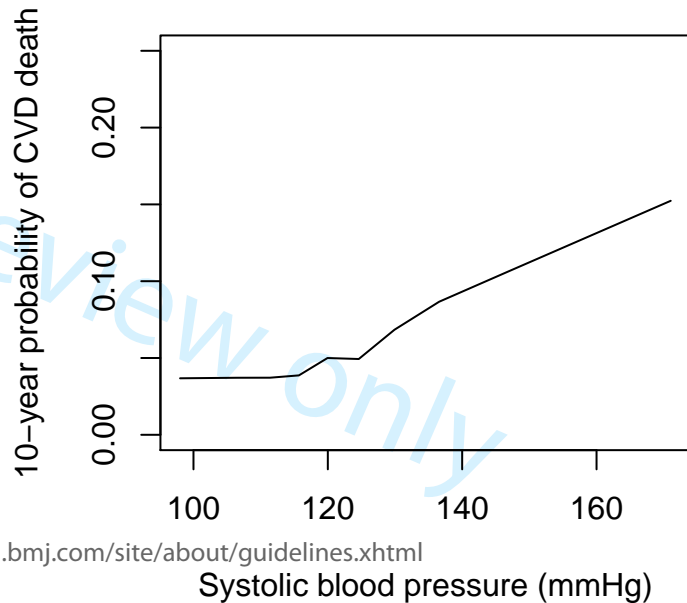

Supplement: bmjopen-2019-032703.draft_revisions.pdf [file bmjopen-2019-032703.draft_revisions.pdf]
